# Supplementary material
Source: bioRxiv or medRxiv preprint supplement (https://www.biorxiv.org/highwire/filestream/93543/field_highwire_adjunct_files/4/304220-5.pdf)
Supplement: Supplementary file [file 304220-5.pdf]

# ABCG2

Strands Chr6:38028366-38028563  
and Chr6:38029833-38030041

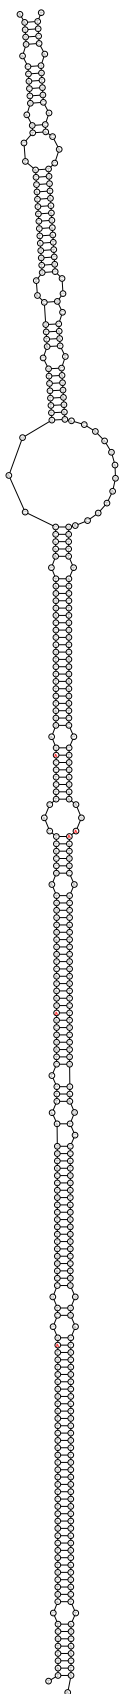

**SHAPE >= 0.85**

1

**0.85 > SHAPE >= 0.4**

**0.4 > SHAPE**

No Data

**ENERGY = -292.6 Chr6:38028366-38028...**

# ACACA

Strands Chr19:13792634-13792705  
and Chr19:13793210-13793273

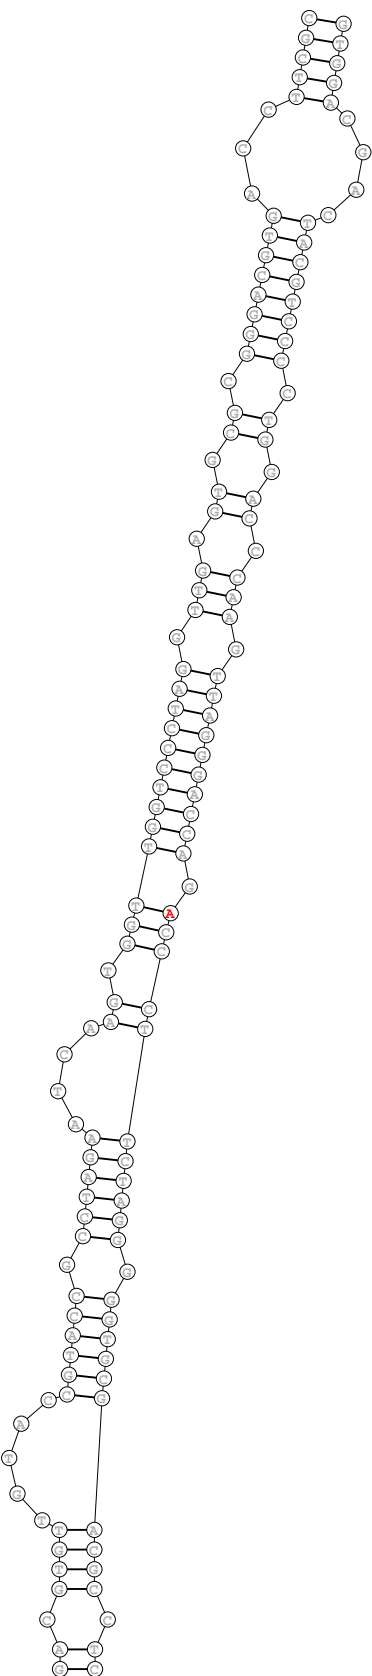

**SHAPE  $\geq$  0.85**

2

**0.85 > SHAPE  $\geq$  0.4**

**0.4 > SHAPE**

No Data

**ENERGY = -70.3 Chr19:13792634-13792...**

# ACADM

Strands Chr3:69347213-69347418  
and Chr3:69348169-69348383

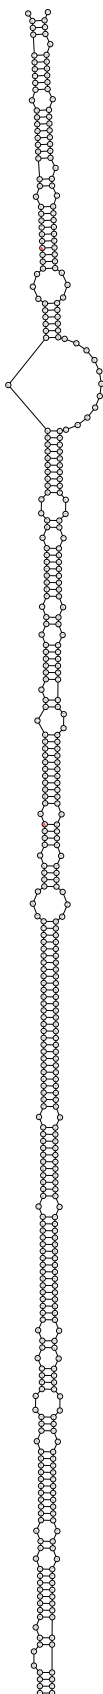

**SHAPE >= 0.85**

3

**0.85 > SHAPE >= 0.4**

**0.4 > SHAPE**

No Data

**ENERGY = -268.0 Chr3:69347213-69347...**

# ACTR3B

Strands Chr4:115928142-115928294  
and Chr4:115929459-115929606

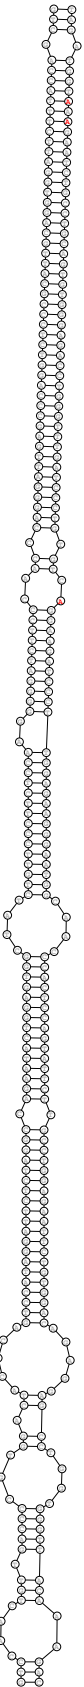

**SHAPE  $\geq$  0.85**

4

**0.85 > SHAPE  $\geq$  0.4**

**0.4 > SHAPE**

No Data

**ENERGY = -217.1 Chr4:115928142-1159...**

# AJUBA

Strands Chr10:21707828-21707864  
and Chr10:21708733-21708768

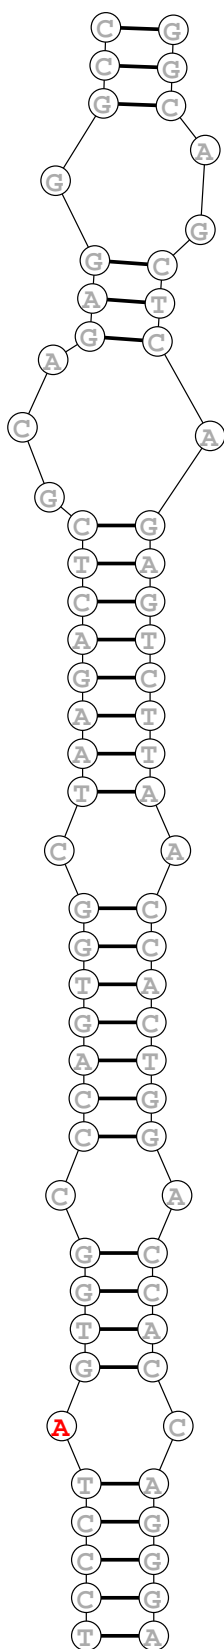

**SHAPE >= 0.85**

5

**0.85 > SHAPE >= 0.4**

**0.4 > SHAPE**

No Data

**ENERGY = -47.5 Chr10:21707828-21707...**

# AKAP13

Strands Chr21:16902923-16902981  
and Chr21:16903443-16903501

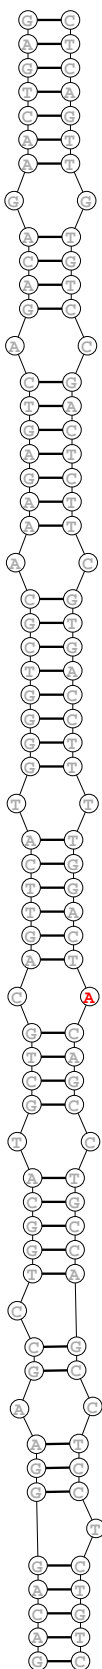

**SHAPE  $\geq$  0.85**

**0.85 > SHAPE  $\geq$  0.4**

**0.4 > SHAPE**

**No Data**

**ENERGY = -79.4 Chr21:16902923-16902...**

# AKAP8L part A

Strands Chr7:8782232-8782376  
and Chr7:8782803-8782949

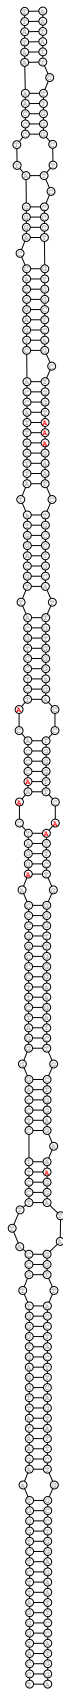

**SHAPE  $\geq 0.85$**

7

**0.85 > SHAPE  $\geq 0.4$**

**0.4 > SHAPE**

No Data

**ENERGY = -207.0 Chr7:8782232-878237...**

# AKAP8L part B

Strands Chr7:8780834-8781045  
and Chr7:8785829-8786066

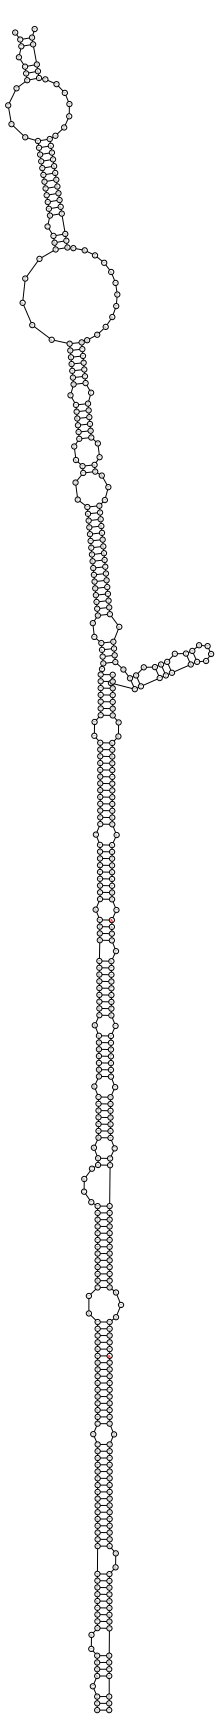

**SHAPE  $\geq$  0.85**

8

**0.85 > SHAPE  $\geq$  0.4**

**0.4 > SHAPE**

No Data

**ENERGY = -279.6 Chr7:8780834-878104...**



# ALDH9A1

Strands Chr3:3274072-3274204  
and Chr3:3275096-3275227

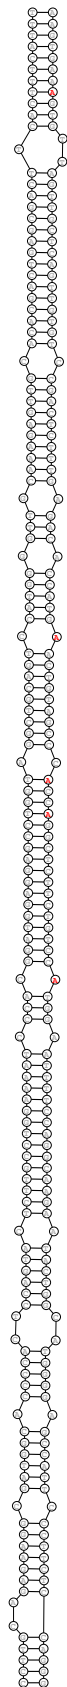

**SHAPE >= 0.85**

9

**0.85 > SHAPE >= 0.4**

**0.4 > SHAPE**

No Data

**ENERGY = -193.2 Chr3:3274072-327420...**

# ALKBH1

Strands Chr10:89894825-89894870  
and Chr10:89895589-89895628

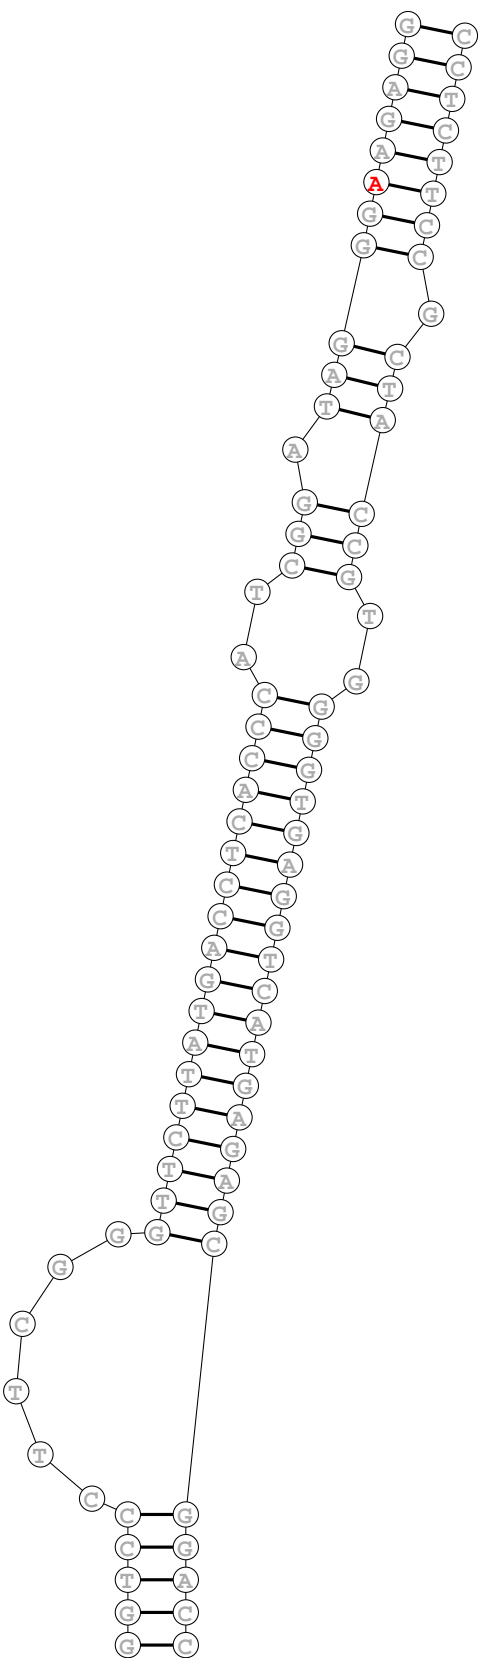

**SHAPE >= 0.85**

10

**0.85 > SHAPE >= 0.4**

**0.4 > SHAPE**

No Data

**ENERGY = -61.7 Chr10:89894825-89894...**

# ARF1

Strands Chr7:2924162-2924286  
and Chr7:2924616-2924740

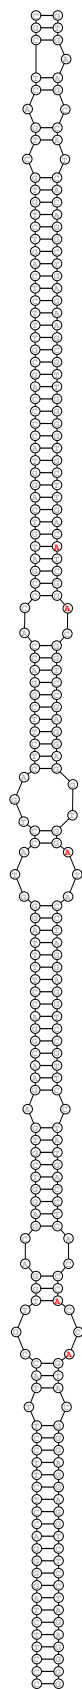

**SHAPE  $\geq 0.85$**

11

**0.85 > SHAPE  $\geq 0.4$**

**0.4 > SHAPE**

No Data

**ENERGY = -192.8 Chr7:2924162-292428...**

# ARHGAP17

Strands Chr25:22844801-22844867  
and Chr25:22847470-22847536

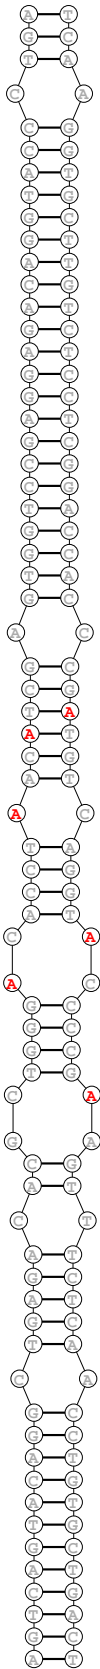

**SHAPE  $\geq 0.85$**

12

**0.85 > SHAPE  $\geq 0.4$**

**0.4 > SHAPE**

No Data

**ENERGY = -99.5 Chr25:22844801-22844...**

# ATF5

Strands Chr18:56727493-56727679  
and Chr18:56728324-56728508

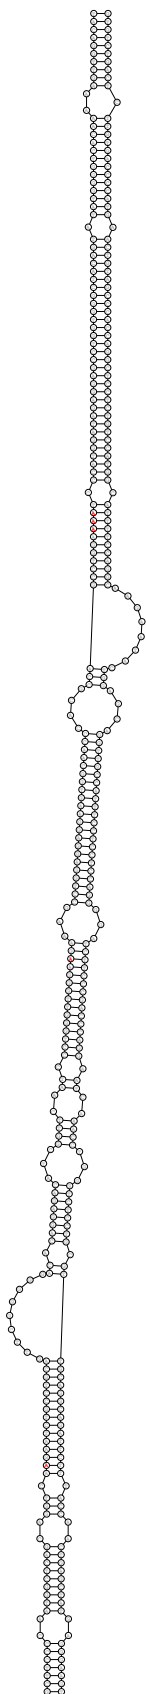

**SHAPE >= 0.85**

13

**0.85 > SHAPE >= 0.4**

**0.4 > SHAPE**

No Data

**ENERGY = -280.4 Chr18:56727493-5672...**

# ATP13A1

Strands Chr7:3604682-3604782  
and Chr7:3605148-3605255

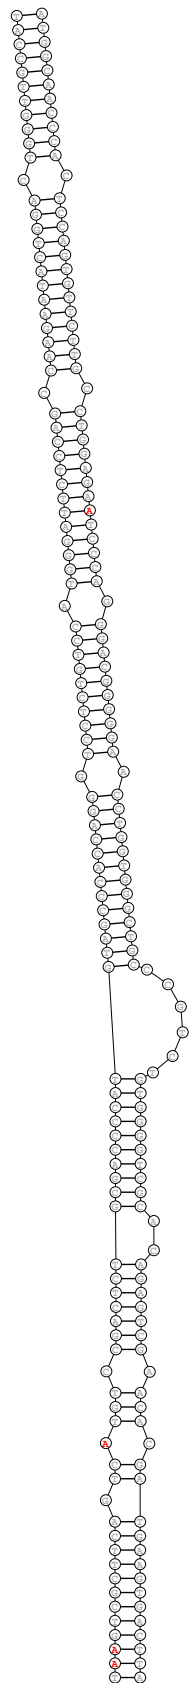

**SHAPE  $\geq 0.85$**

14

**0.85 > SHAPE  $\geq 0.4$**

**0.4 > SHAPE**

No Data

**ENERGY = -166.8 Chr7:3604682-360478...**

# AURKAIP1

Strands Chr16:52399177-52399586  
and Chr16:52399928-52400375

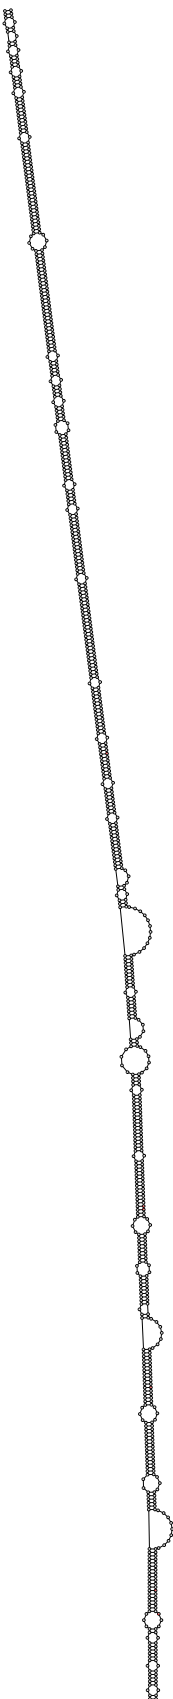

**SHAPE >= 0.85**

15

**0.85 > SHAPE >= 0.4**

**0.4 > SHAPE**

No Data

**ENERGY = -571.3 Chr16:52399177-5239...**

# B4GALT1

Strands Chr8:76183743-76183987  
and Chr8:76189889-76190127

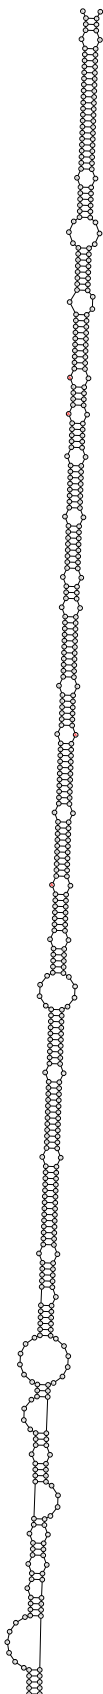

**SHAPE >= 0.85**

16

**0.85 > SHAPE >= 0.4**

**0.4 > SHAPE**

No Data

**ENERGY = -310.0 Chr8:76183743-76183...**



# BAG4

Strands Chr27:33097895-33098010  
and Chr27:33099298-33099414

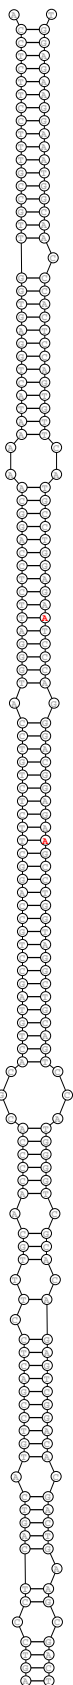

**SHAPE >= 0.85**

17

**0.85 > SHAPE >= 0.4**

**0.4 > SHAPE**

No Data

**ENERGY = -197.1 Chr27:33097895-3309...**

# BLCAP

Strands Chr13:67116360-67116472  
and Chr13:67116925-67117035

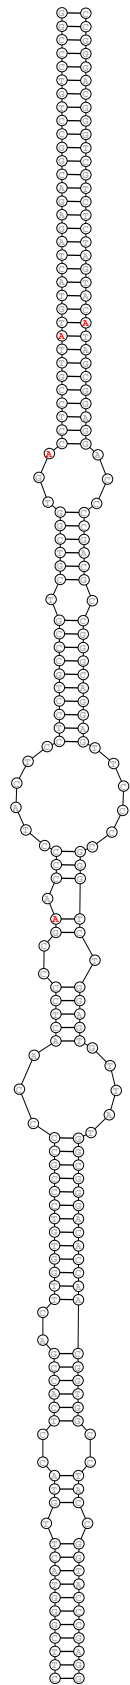

**SHAPE >= 0.85**

18

**0.85 > SHAPE >= 0.4**

**0.4 > SHAPE**

No Data

**ENERGY = -172.0 Chr13:67116360-6711...**

# BSPRY

Strands Chr8:104327767-104327905  
and Chr8:104328420-104328554

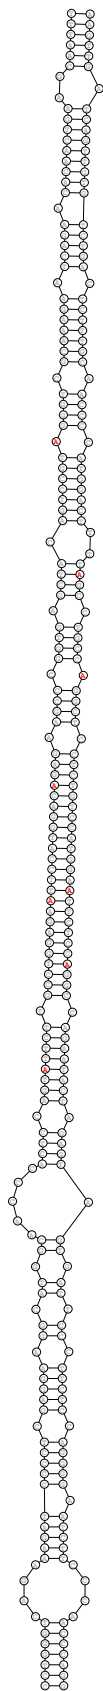

**SHAPE  $\geq$  0.85**

19

**0.85 > SHAPE  $\geq$  0.4**

**0.4 > SHAPE**

No Data

**ENERGY = -170.1 Chr8:104327767-1043...**

C1H21orf59

Strands Chr1:2206485-2206621  
and Chr1:2206981-2207116

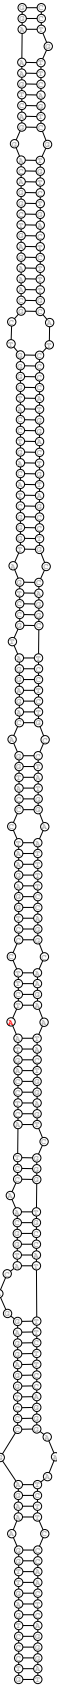

**SHAPE >= 0.85**

20

**0.85 > SHAPE >= 0.4**

**0.4 > SHAPE**

No Data

**ENERGY = -209.1 Chr1:2206485-220662...**

# CALD1 part A

Strands Chr4:99549373-99549541  
and Chr4:99550220-99550388

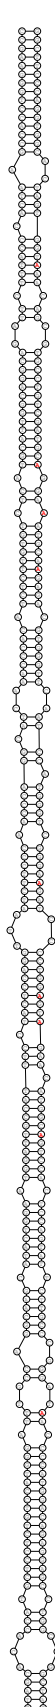

**SHAPE >= 0.85**

21

**0.85 > SHAPE >= 0.4**

**0.4 > SHAPE**

No Data

**ENERGY = -236.4 Chr4:99549373-99549...**

# CALD1 part B

Strands Chr4:99550281-99550390  
and Chr4:99550429-99550532

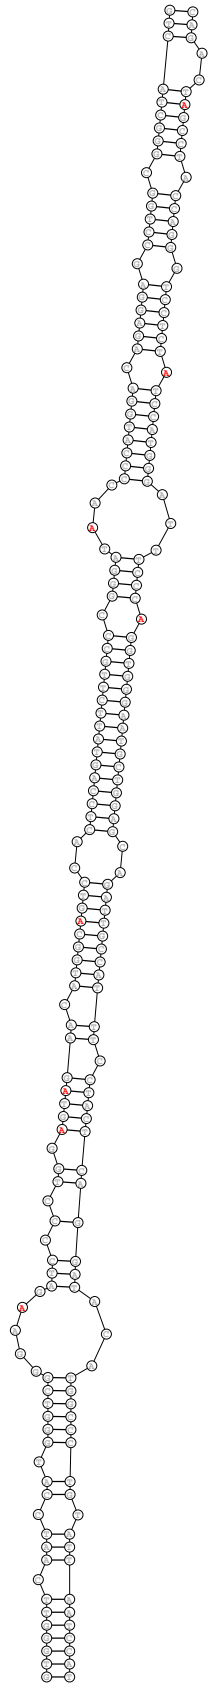

**SHAPE >= 0.85**

22

**0.85 > SHAPE >= 0.4**

**0.4 > SHAPE**

No Data

**ENERGY = -126.2 Chr4:99550281-99550...**

# CAMKK1

Strands Chr19:25118004-25118128  
and Chr19:25119336-25119460

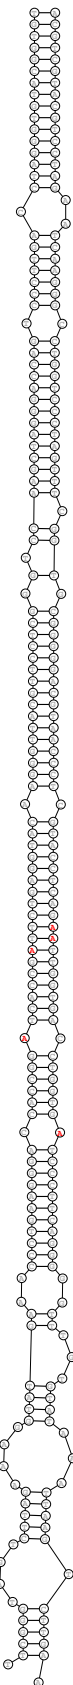

**SHAPE  $\geq$  0.85**

23

**0.85 > SHAPE  $\geq$  0.4**

**0.4 > SHAPE**

No Data

**ENERGY = -164.0 Chr19:25118004-2511...**

# CAMKK2 part A

Strands Chr17:56161529-56161627  
and Chr17:56163303-56163401

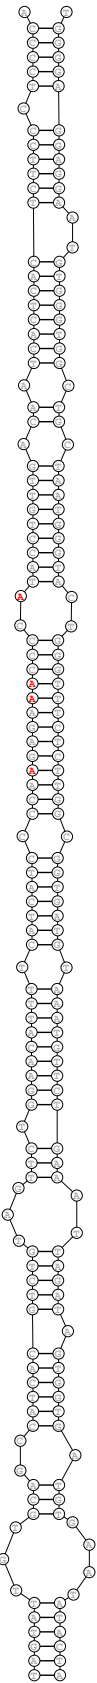

**SHAPE >= 0.85**

24

**0.85 > SHAPE >= 0.4**

**0.4 > SHAPE**

No Data

**ENERGY = -105.1 Chr17:56161529-5616...**



# CAMKK2 part B

Strands Chr17:56161652-56161761  
and Chr17:56163165-56163276

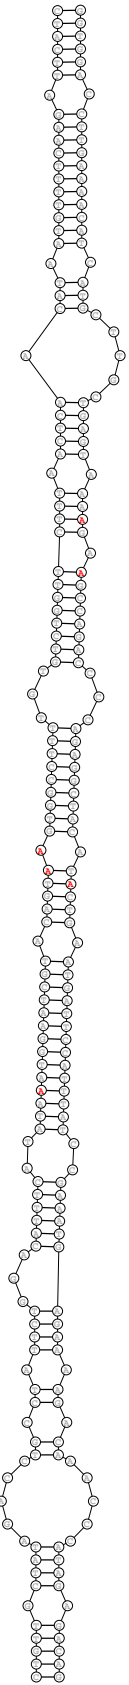

**SHAPE >= 0.85**

25

**0.85 > SHAPE >= 0.4**

**0.4 > SHAPE**

No Data

**ENERGY = -94.3 Chr17:56161652-56161...**

# CATSPERD

Strands Chr7:19780696-19780756  
and Chr7:19780869-19780926

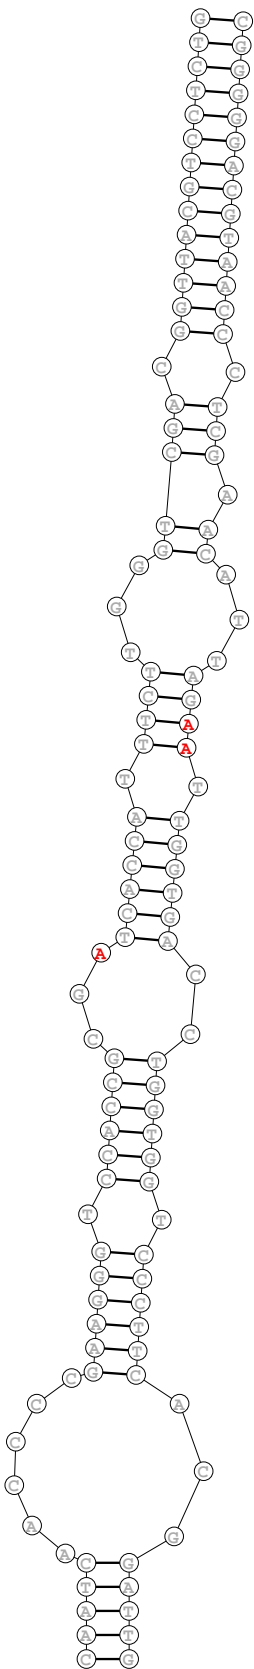

**SHAPE >= 0.85**

**0.85 > SHAPE >= 0.4**

**0.4 > SHAPE**

**No Data**

**ENERGY = -67.0 Chr7:19780696-197807...**

# CATSPERG part A

Strands Chr18:48418071-48418169  
and Chr18:48418603-48418701

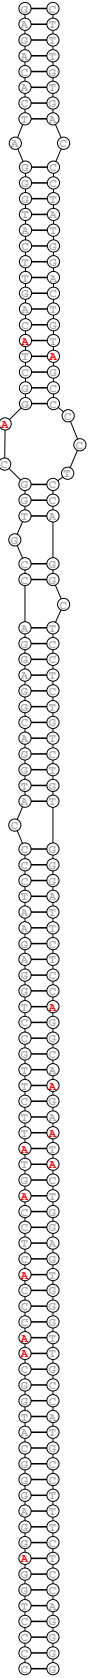

**SHAPE  $\geq 0.85$**

27

**0.85 > SHAPE  $\geq 0.4$**

**0.4 > SHAPE**

No Data

**ENERGY = -182.2 Chr18:48418071-4841...**

# CATSPERG part B

Strands Chr18:48438581-48438671  
and Chr18:48439740-48439830

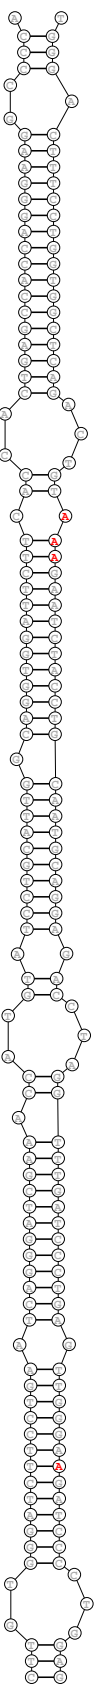

**SHAPE  $\geq$  0.85**

28

**0.85 > SHAPE  $\geq$  0.4**

**0.4 > SHAPE**

No Data

**ENERGY = -125.1 Chr18:48438581-4843...**

# CCDC51

Strands Chr22:51996166-51996203  
and Chr22:51996268-51996305

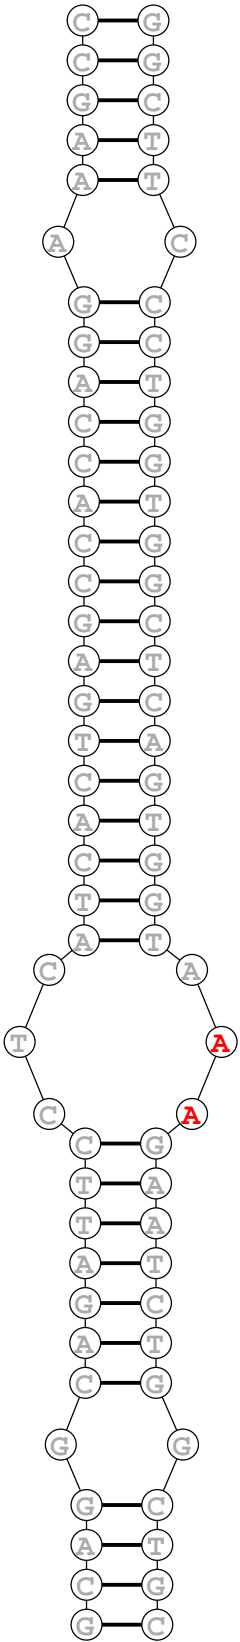

**SHAPE >= 0.85**

**0.85 > SHAPE >= 0.4**

**0.4 > SHAPE**

No Data

**ENERGY = -60.3 Chr22:51996166-51996...**

# CCDC64

Strands Chr17:64704951-64705065  
and Chr17:64705219-64705334

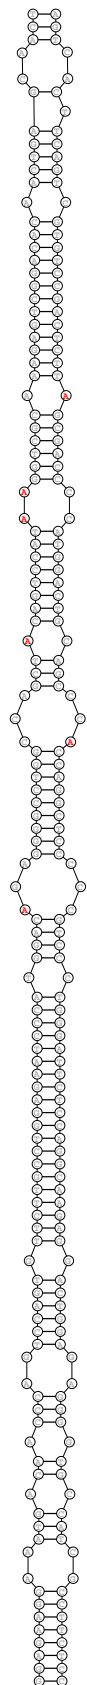

**SHAPE >= 0.85**

30

**0.85 > SHAPE >= 0.4**

**0.4 > SHAPE**

No Data

**ENERGY = -166.6 Chr17:64704951-6470...**

# CCDC82 part A

Strands Chr15:14127953-14128141  
and Chr15:14129583-14129769

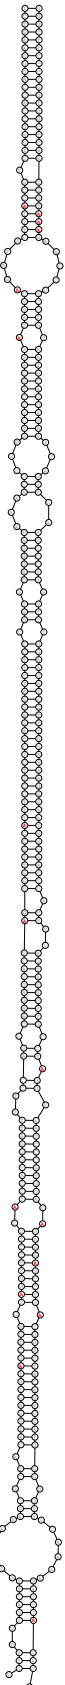

**SHAPE >= 0.85**

31

**0.85 > SHAPE >= 0.4**

**0.4 > SHAPE**

No Data

**ENERGY = -265.3 Chr15:14127953-1412...**

# CCDC82 part B

Strands Chr15:14128168-14128361  
and Chr15:14129591-14129785

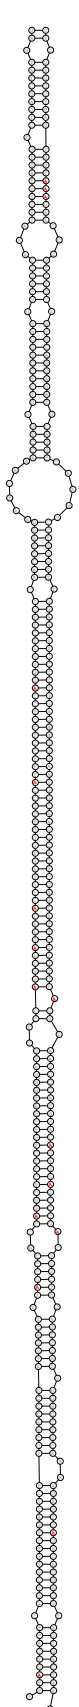

**SHAPE >= 0.85**

32

**0.85 > SHAPE >= 0.4**

**0.4 > SHAPE**

No Data

**ENERGY = -322.4 Chr15:14128168-1412...**



# CCDC84

Strands Chr15:30114185-30114284  
and Chr15:30115171-30115278

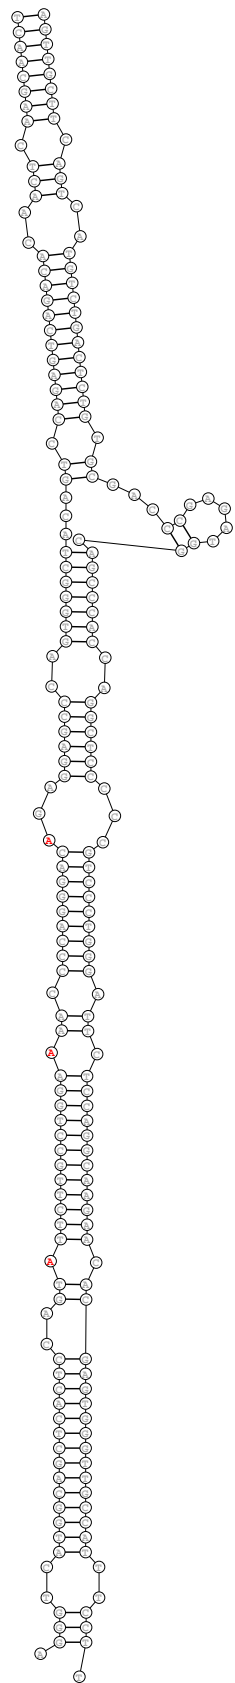

**SHAPE >= 0.85**

33

**0.85 > SHAPE >= 0.4**

**0.4 > SHAPE**

No Data

**ENERGY = -132.8 Chr15:30114185-3011...**



# CCNDBP1 part B

Strands Chr10:38517317-38517399  
and Chr10:38517727-38517821

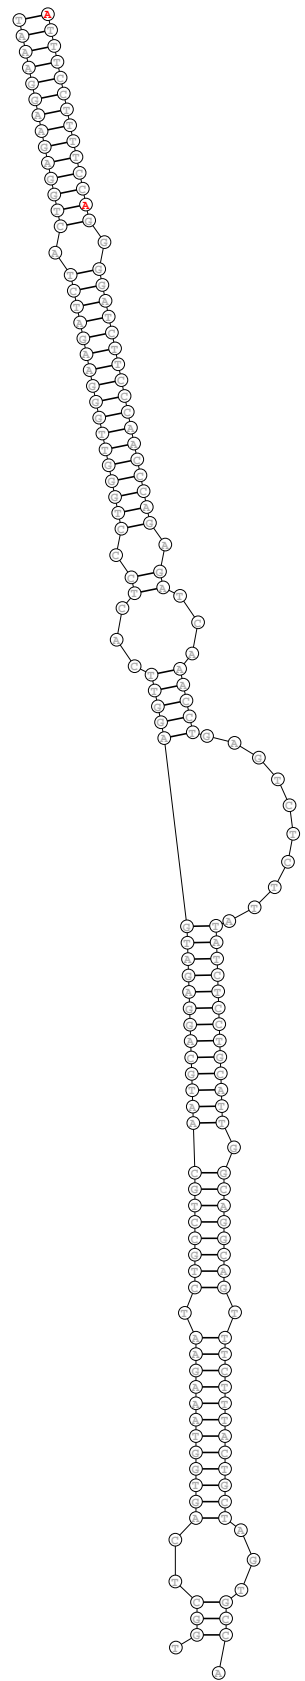

**SHAPE  $\geq$  0.85**

35

**0.85 > SHAPE  $\geq$  0.4**

**0.4 > SHAPE**

No Data

**ENERGY = -117.8 Chr10:38517317-3851...**

CCNI

Strands Chr6:93635566-93635672  
and Chr6:93636451-93636554

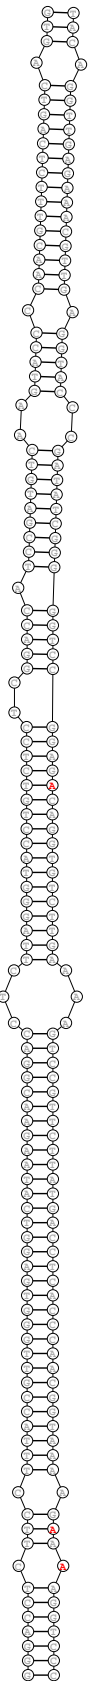

**SHAPE >= 0.85**

36

**0.85 > SHAPE >= 0.4**

**0.4 > SHAPE**

No Data

**ENERGY = -153.7 Chr6:93635566-93635...**

# CCS

Strands Chr29:45284231-45284327  
and Chr29:45285011-45285106

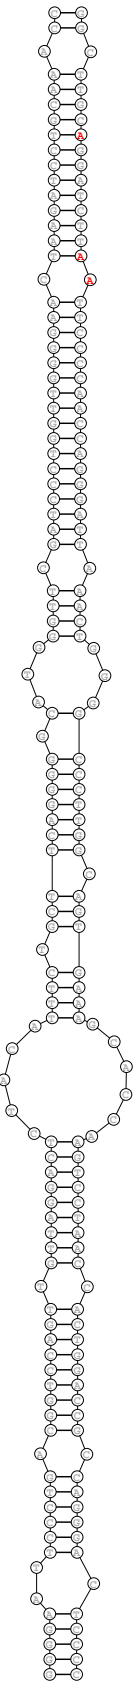

**SHAPE >= 0.85**

37

**0.85 > SHAPE >= 0.4**

**0.4 > SHAPE**

No Data

**ENERGY = -130.2 Chr29:45284231-4528...**

# CD164

Strands Chr9:41252876-41253005  
and Chr9:41254392-41254524

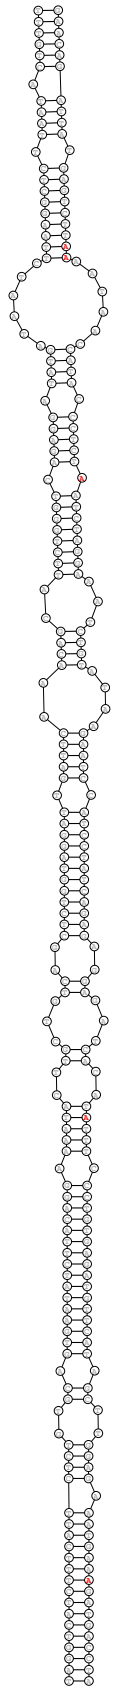

**SHAPE >= 0.85**

38

**0.85 > SHAPE >= 0.4**

**0.4 > SHAPE**

No Data

**ENERGY = -127.8 Chr9:41252876-41253...**

# CD300LG part A

Strands Chr19:44358579-44358659  
and Chr19:44359647-44359737

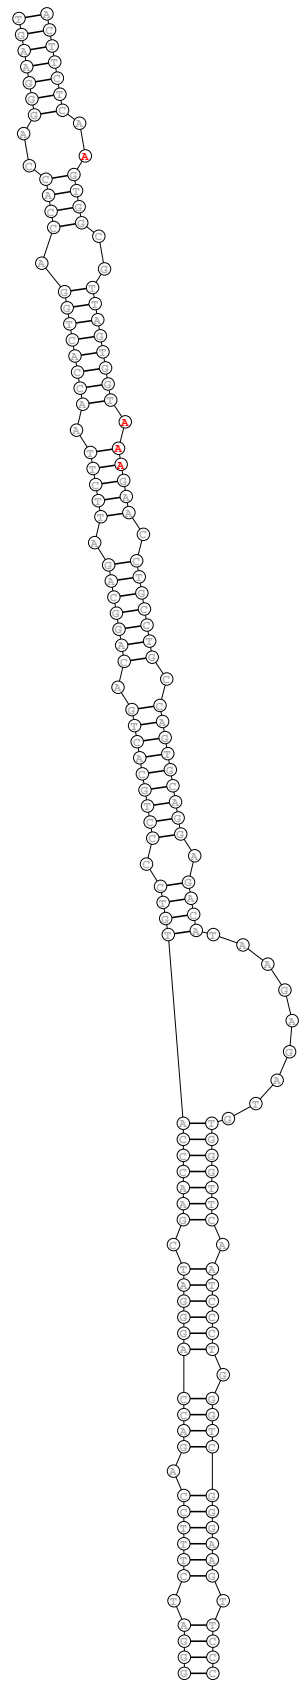

**SHAPE  $\geq$  0.85**

39

**0.85 > SHAPE  $\geq$  0.4**

**0.4 > SHAPE**

No Data

**ENERGY = -109.2 Chr19:44358579-4435...**

# CD300LG part B

Strands Chr19:44362659-44362780  
and Chr19:44363858-44363979

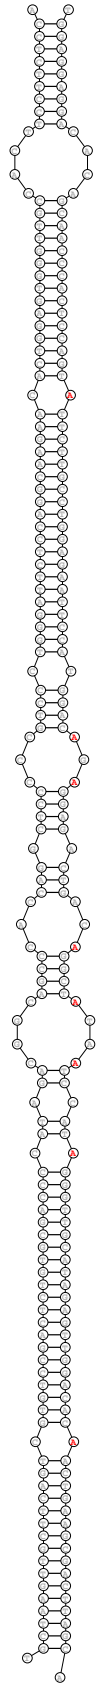

**SHAPE  $\geq$  0.85**

40

**0.85 > SHAPE  $\geq$  0.4**

**0.4 > SHAPE**

No Data

**ENERGY = -178.4 Chr19:44362659-4436...**



# CD36 part A

Strands Chr4:40583187-40583318  
and Chr4:40584424-40584555

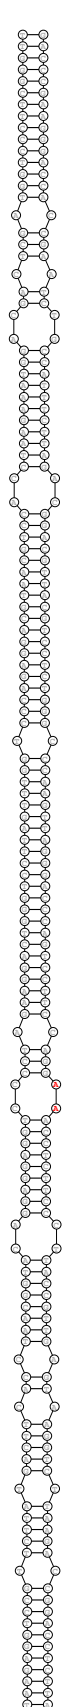

**SHAPE >= 0.85**

41

**0.85 > SHAPE >= 0.4**

**0.4 > SHAPE**

No Data

**ENERGY = -200.1 Chr4:40583187-40583...**

# CD36 part B

Strands Chr4:40591332-40591609  
and Chr4:40592605-40592884

**SHAPE >= 0.85**

42

**0.85 > SHAPE >= 0.4**

**0.4 > SHAPE**

No Data

**ENERGY = -542.8 Chr4:40591332-40591...**

# CD36 part C

Strands Chr4:40621823-40621923  
and Chr4:40622253-40622357

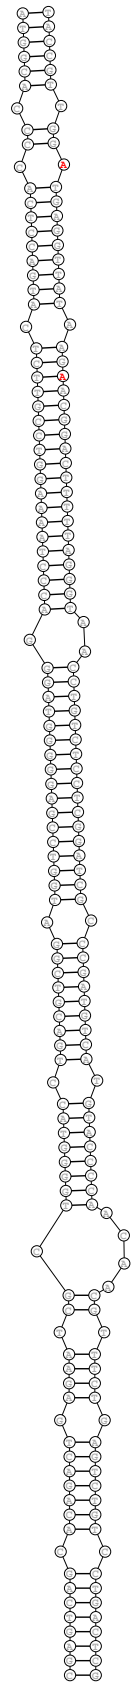

**SHAPE  $\geq 0.85$**

43

**0.85 > SHAPE  $\geq 0.4$**

**0.4 > SHAPE**

No Data

**ENERGY = -149.0 Chr4:40621823-40621...**

# CD46

Strands Chr16:77486552-77486779  
and Chr16:77487529-77487741

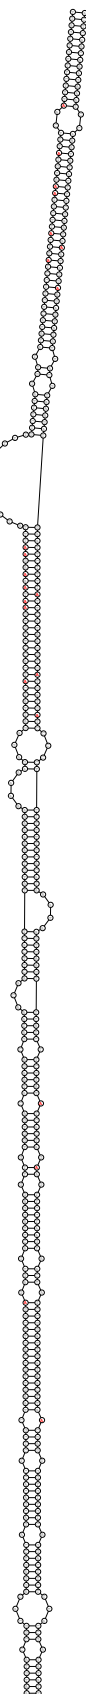

**SHAPE >= 0.85**

44

**0.85 > SHAPE >= 0.4**

**0.4 > SHAPE**

No Data

**ENERGY = -245.0 Chr16:77486552-7748...**

# CD47

Strands Chr1:53113970-53114080  
and Chr1:53114199-53114315

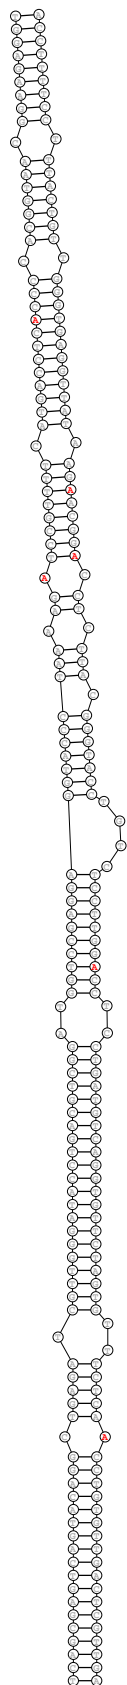

**SHAPE  $\geq 0.85$**

45

**0.85 > SHAPE  $\geq 0.4$**

**0.4 > SHAPE**

No Data

**ENERGY = -155.4 Chr1:53113970-53114...**

# CD9 part A

Strands Chr5:104511283-104511399  
and Chr5:104512161-104512277

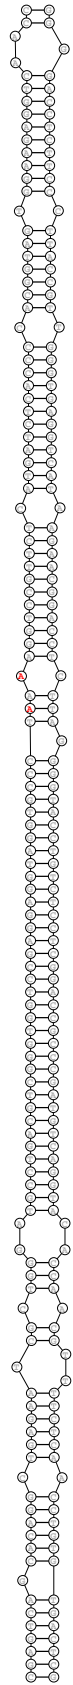

**SHAPE >= 0.85**

46

**0.85 > SHAPE >= 0.4**

**0.4 > SHAPE**

No Data

**ENERGY = -189.0 Chr5:104511283-1045...**

CD9 part B

Strands Chr5:104513692-104513871  
and Chr5:104514476-104514636

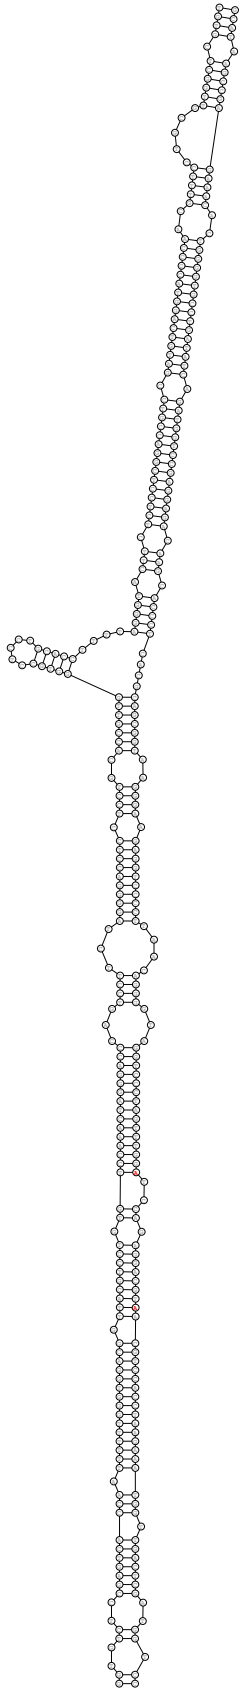

**SHAPE >= 0.85**

47

**0.85 > SHAPE >= 0.4**

**0.4 > SHAPE**

No Data

**ENERGY = -224.6 Chr5:104513692-1045...**

# CDC16

Strands Chr12:91062205-91062406  
and Chr12:91064554-91064750

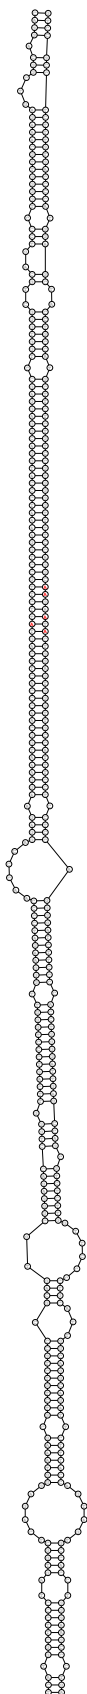

**SHAPE >= 0.85**

48

**0.85 > SHAPE >= 0.4**

**0.4 > SHAPE**

No Data

**ENERGY = -304.0 Chr12:91062205-9106...**



# CDK20

Strands Chr8:91629482-91629626  
and Chr8:91631299-91631446

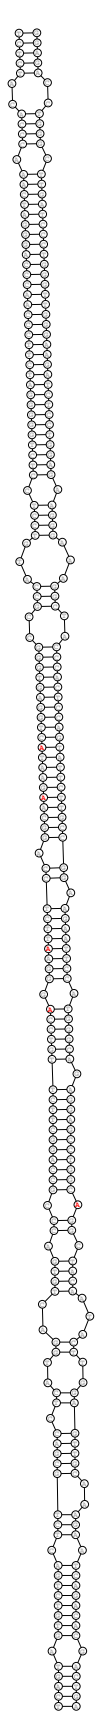

**SHAPE >= 0.85**

49

**0.85 > SHAPE >= 0.4**

**0.4 > SHAPE**

No Data

**ENERGY = -209.1 Chr8:91629482-91629...**

# CEP95

Strands Chr19:49372718-49372784  
and Chr19:49373383-49373453

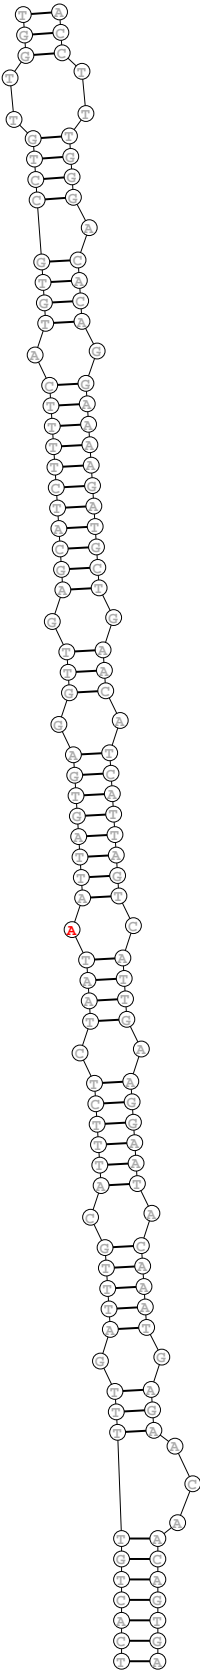

**SHAPE >= 0.85**

50

**0.85 > SHAPE >= 0.4**

**0.4 > SHAPE**

**No Data**

**ENERGY = -60.9 Chr19:49372718-49372...**

# CLN3

Strands Chr25:26311910-26312044  
and Chr25:26312351-26312485

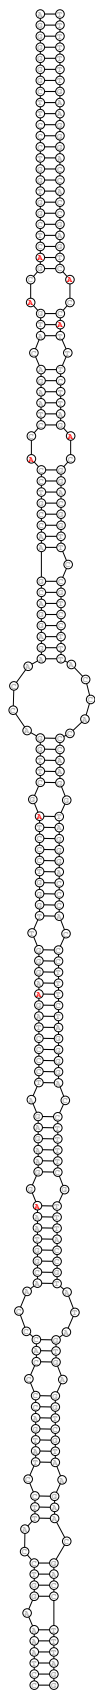

**SHAPE >= 0.85**

51

**0.85 > SHAPE >= 0.4**

**0.4 > SHAPE**

No Data

**ENERGY = -183.5 Chr25:26311910-2631...**

# CMTM7 part A

Strands Chr22:6939010-6939124  
and Chr22:6939290-6939399

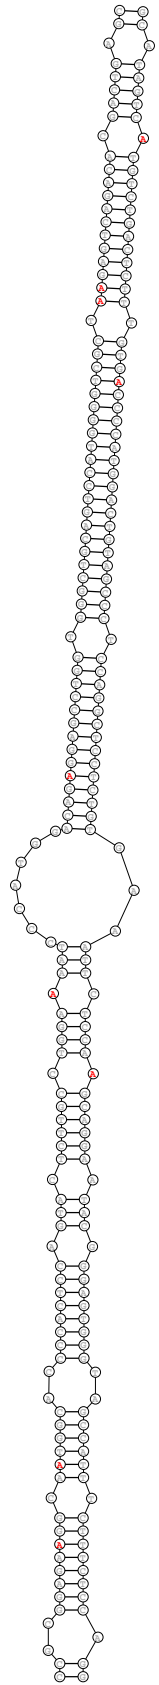

**SHAPE  $\geq 0.85$**

52

**0.85 > SHAPE  $\geq 0.4$**

**0.4 > SHAPE**

No Data

**ENERGY = -167.7 Chr22:6939010-69391...**

CMTM7 part B

Strands Chr22:6939155-6939264  
and Chr22:6939293-6939398

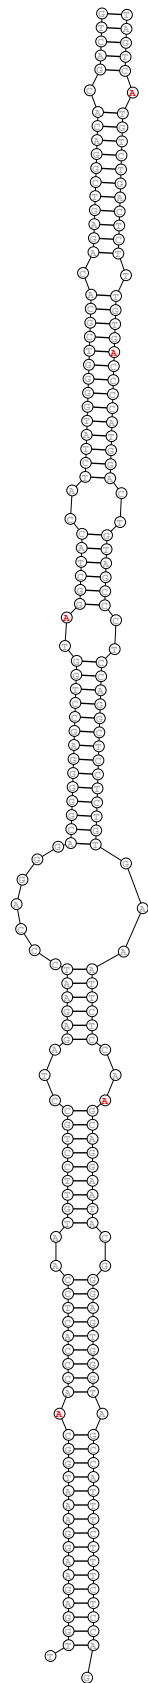

**SHAPE >= 0.85**

53

**0.85 > SHAPE >= 0.4**

**0.4 > SHAPE**

No Data

**ENERGY = -160.2 Chr22:6939155-69392...**

# CMTM8

Strands Chr22:6883561-6883640  
and Chr22:6884080-6884161

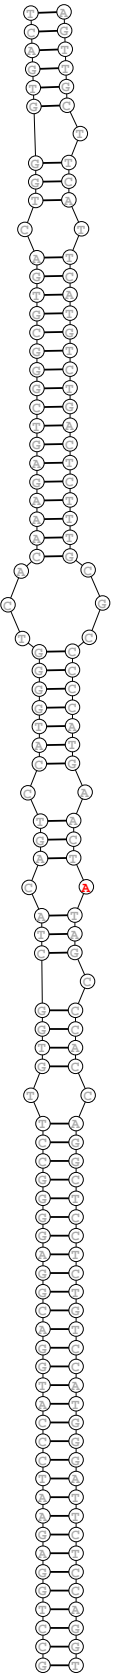

**SHAPE  $\geq$  0.85**

54

**0.85 > SHAPE  $\geq$  0.4**

**0.4 > SHAPE**

No Data

**ENERGY = -126.4 Chr22:6883561-68836...**

# CNOT11

Strands Chr11:6205730-6205819  
and Chr11:6206198-6206288

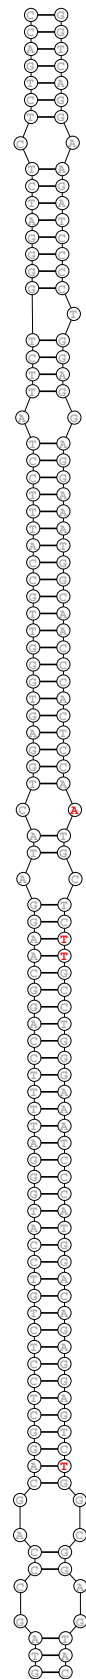

**SHAPE  $\geq 0.85$**

55

**0.85 > SHAPE  $\geq 0.4$**

**0.4 > SHAPE**

No Data

**ENERGY = -149.4 Chr11:6205730-62058...**

# COG5

Strands Chr4:48571952-48572077  
and Chr4:48572763-48572878

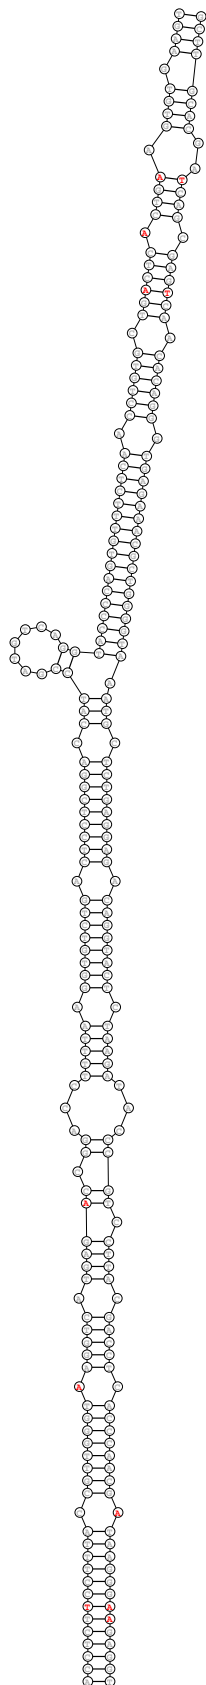

**SHAPE >= 0.85**

56

**0.85 > SHAPE >= 0.4**

**0.4 > SHAPE**

No Data

**ENERGY = -142.9 Chr4:48571952-48572...**



# COL6A2

Strands Chr1:147567935-147568003  
and Chr1:147568549-147568613

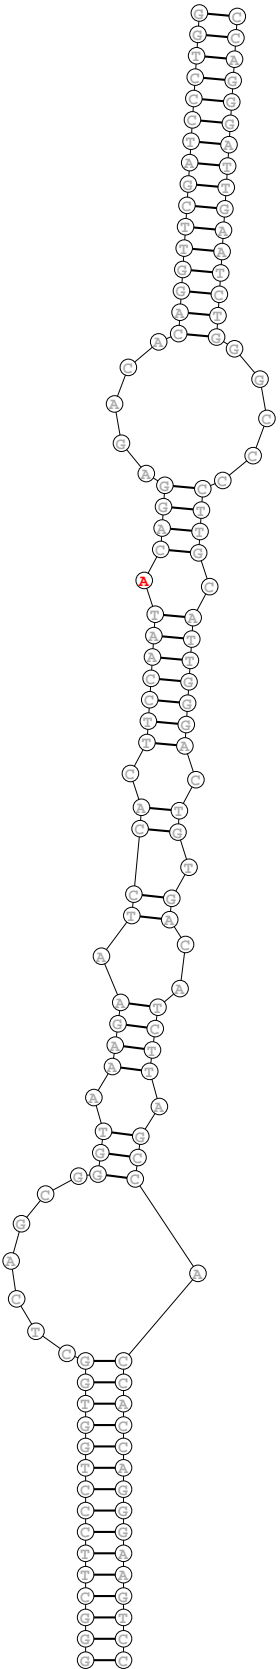

**SHAPE >= 0.85**

57

**0.85 > SHAPE >= 0.4**

**0.4 > SHAPE**

No Data

**ENERGY = -75.7 Chr1:147567935-14756...**

# COPS3 part A

Strands Chr19:35494881-35495004  
and Chr19:35495817-35495941

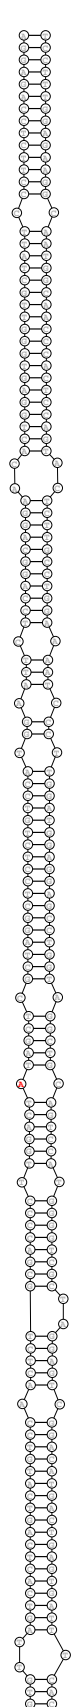

**SHAPE >= 0.85**

58

**0.85 > SHAPE >= 0.4**

**0.4 > SHAPE**

No Data

**ENERGY = -199.6 Chr19:35494881-3549...**

# COPS3 part B

Strands Chr19:35499158-35499223  
and Chr19:35500664-35500730

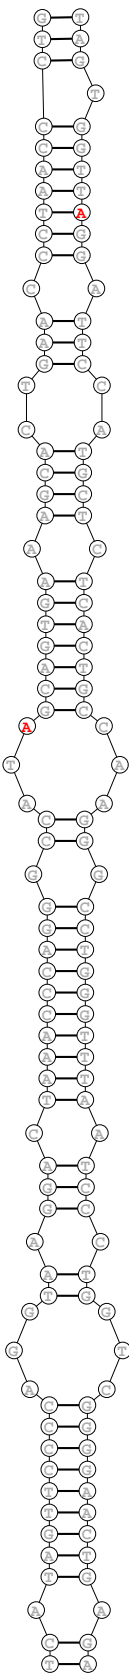

**SHAPE >= 0.85**

59

**0.85 > SHAPE >= 0.4**

**0.4 > SHAPE**

No Data

**ENERGY = -76.1 Chr19:35499158-35499...**

# CRYZL1

Strands Chr1:1216986-1217106  
and Chr1:1217320-1217436

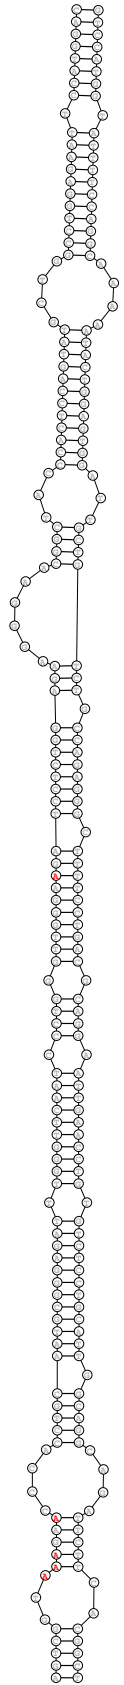

**SHAPE  $\geq$  0.85**

60

**0.85 > SHAPE  $\geq$  0.4**

**0.4 > SHAPE**

No Data

**ENERGY = -149.6 Chr1:1216986-121710...**

# CSF2RB

Strands Chr5:75739061-75739179  
and Chr5:75739512-75739629

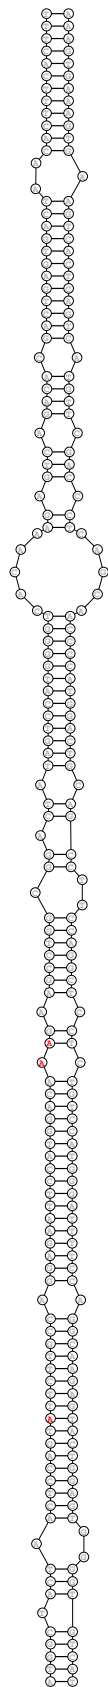

**SHAPE >= 0.85**

61

**0.85 > SHAPE >= 0.4**

**0.4 > SHAPE**

No Data

**ENERGY = -156.3 Chr5:75739061-75739...**

# CSN1S1

Strands Chr6:87151428-87151531  
and Chr6:87151720-87151842

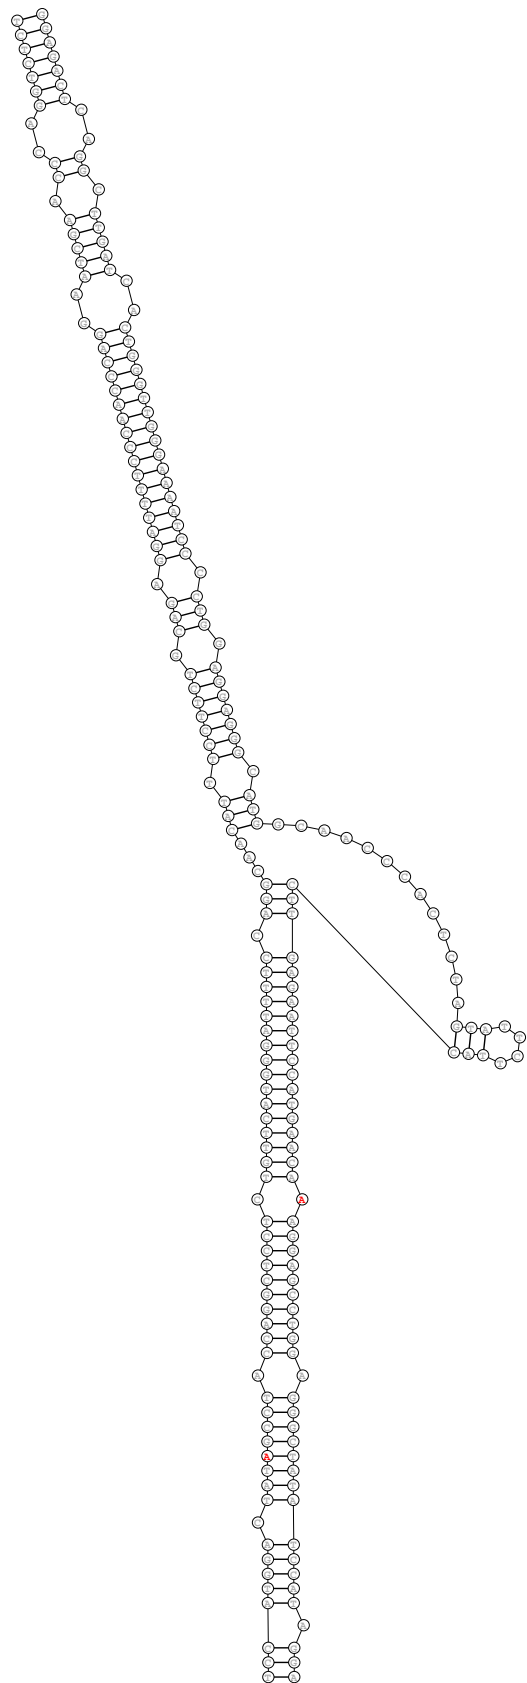

**SHAPE >= 0.85**

62

**0.85 > SHAPE >= 0.4**

**0.4 > SHAPE**

No Data

**ENERGY = -137.3 Chr6:87151428-87151...**

# CSN2

Strands Chr6:87183834-87184101  
and Chr6:87184721-87184987

**SHAPE >= 0.85**

63

**0.85 > SHAPE >= 0.4**

**0.4 > SHAPE**

No Data

**ENERGY = -505.2 Chr6:87183834-87184...**

# CSN3

Strands Chr6:87381295-87381513  
and Chr6:87381709-87381936

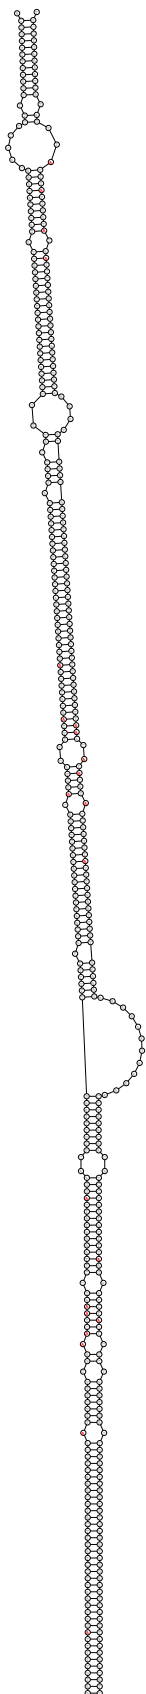

**SHAPE >= 0.85**

64

**0.85 > SHAPE >= 0.4**

**0.4 > SHAPE**

No Data

**ENERGY = -243.7 Chr6:87381295-87381...**



# CYP11A1 part A

Strands Chr21:34729479-34729558  
and Chr21:34730096-34730175

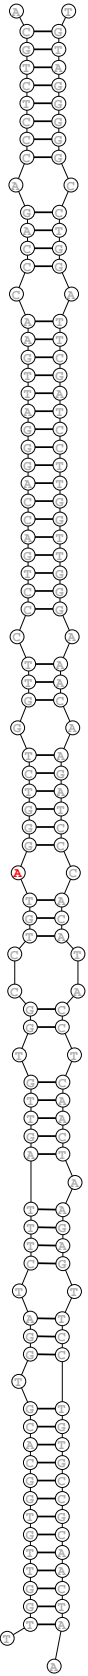

**SHAPE >= 0.85**

65

**0.85 > SHAPE >= 0.4**

**0.4 > SHAPE**

No Data

**ENERGY = -102.4 Chr21:34729479-3472...**

# DCP2

Strands Chr10:930105-930261  
and Chr10:930723-930877

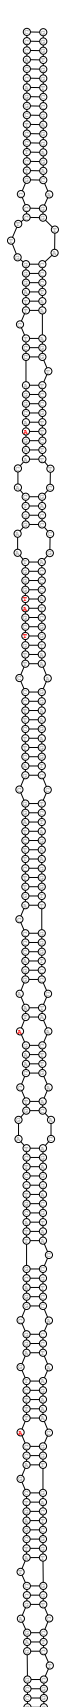

**SHAPE  $\geq$  0.85**

66

**0.85 > SHAPE  $\geq$  0.4**

**0.4 > SHAPE**

No Data

**ENERGY = -213.8 Chr10:930105-930261...**

# DDX31

Strands Chr11:102702651-102702969  
and Chr11:102707660-102707979

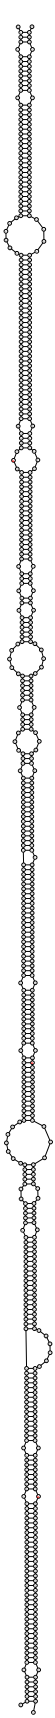

**SHAPE >= 0.85**

67

**0.85 > SHAPE >= 0.4**

**0.4 > SHAPE**

No Data

**ENERGY = -439.0 Chr11:102702651-102...**

# DIABLO part A

Strands Chr17:55411801-55411884  
and Chr17:55414256-55414339

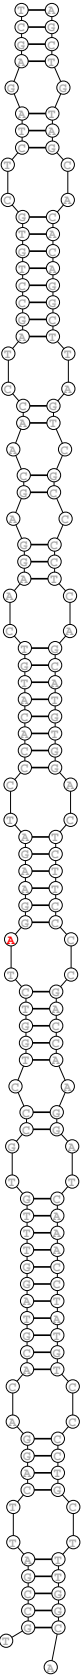

**SHAPE >= 0.85**

68

**0.85 > SHAPE >= 0.4**

**0.4 > SHAPE**

No Data

**ENERGY = -100.0 Chr17:55411801-5541...**

# DIABLO part B

Strands Chr17:55414708-55414788  
and Chr17:55415377-55415458

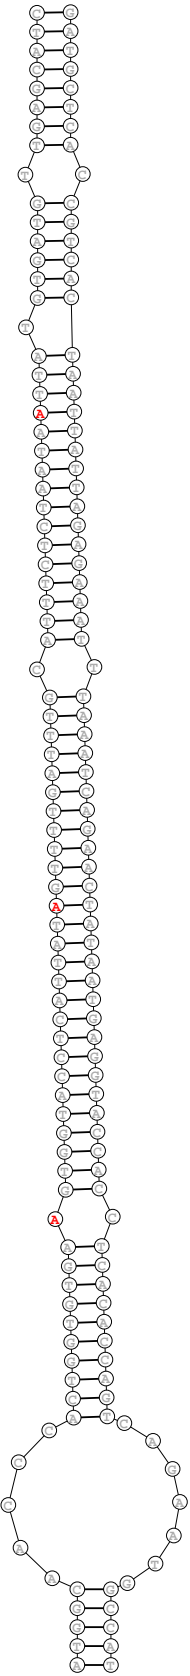

**SHAPE  $\geq 0.85$**

69

**0.85 > SHAPE  $\geq 0.4$**

**0.4 > SHAPE**

No Data

**ENERGY = -106.4 Chr17:55414708-5541...**

# DNAJC12 part A

Strands Chr28:24401530-24401560  
and Chr28:24402205-24402235

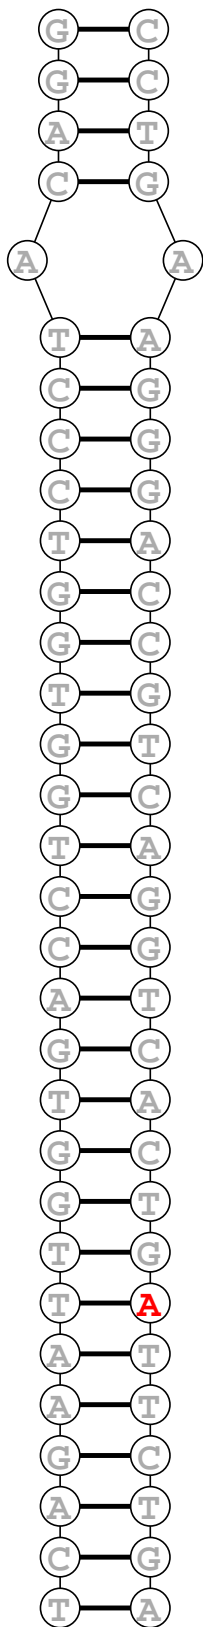

**SHAPE >= 0.85**

70

**0.85 > SHAPE >= 0.4**

**0.4 > SHAPE**

No Data

**ENERGY = -50.4 Chr28:24401530-24401...**



# DNAJC12 part C

Strands Chr28:24414119-24414305  
and Chr28:24414992-24415176

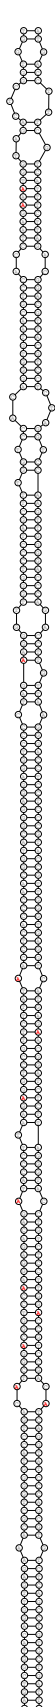

**SHAPE >= 0.85**

72

**0.85 > SHAPE >= 0.4**

**0.4 > SHAPE**

No Data

**ENERGY = -299.6 Chr28:24414119-2441...**



# DNAJC12 part D

Strands Chr28:24414907-24415005  
and Chr28:24415083-24415180

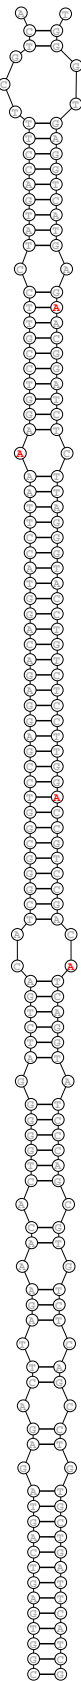

**SHAPE >= 0.85**

73

**0.85 > SHAPE >= 0.4**

**0.4 > SHAPE**

No Data

**ENERGY = -138.6 Chr28:24414907-2441...**

# DONSON

Strands Chr1:1230423-1230635  
and Chr1:1230836-1231049

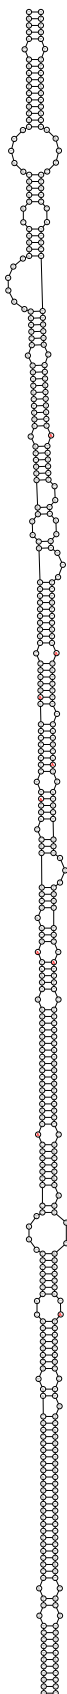

**SHAPE >= 0.85**

74

**0.85 > SHAPE >= 0.4**

**0.4 > SHAPE**

No Data

**ENERGY = -272.9 Chr1:1230423-123063...**

# DTNB

Strands Chr11:73878456-73878573  
and Chr11:73878627-73878728

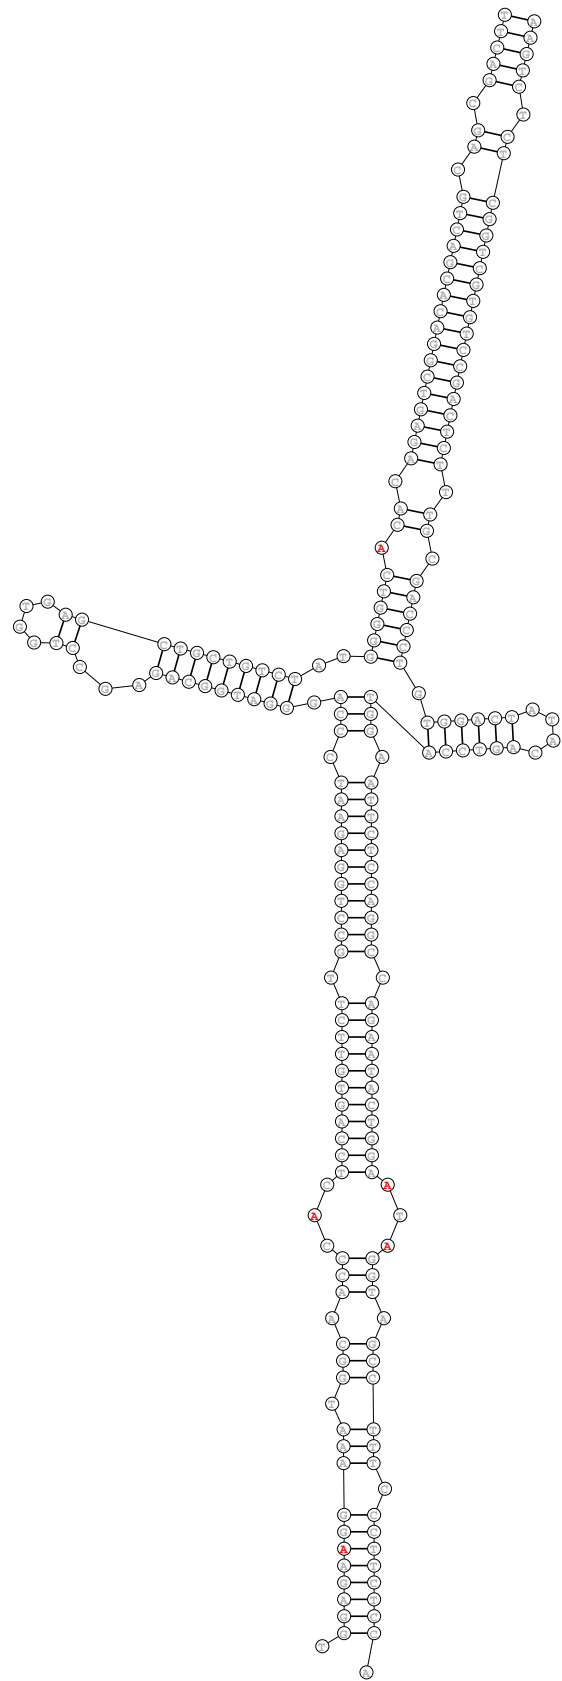

**SHAPE  $\geq$  0.85**

**0.85 > SHAPE  $\geq$  0.4**

**0.4 > SHAPE**

No Data

**ENERGY = -141.2 Chr11:73878456-7387...**

# DUSP19

Strands Chr2:13514106-13514184  
and Chr2:13514309-13514387

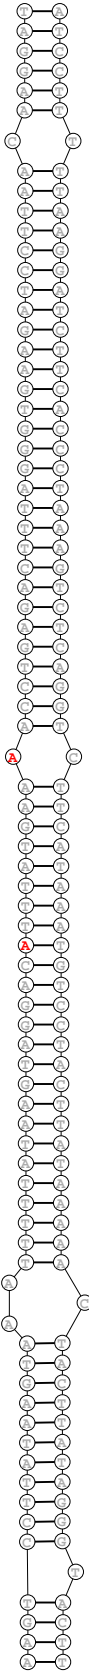

**SHAPE >= 0.85**

76

**0.85 > SHAPE >= 0.4**

**0.4 > SHAPE**

No Data

**ENERGY = -110.6 Chr2:13514106-13514...**

# EAPP

Strands Chr21:45354446-45354571  
and Chr21:45355913-45356037

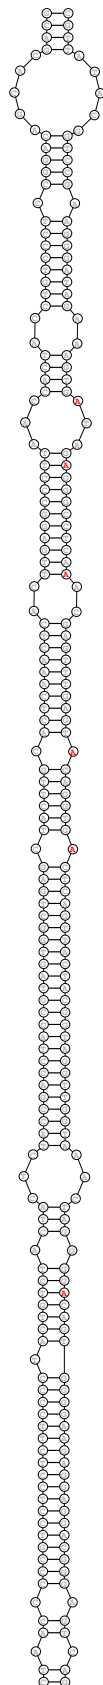

**SHAPE >= 0.85**

77

**0.85 > SHAPE >= 0.4**

**0.4 > SHAPE**

No Data

**ENERGY = -174.5 Chr21:45354446-4535...**

# ECH1

Strands Chr18:48813872-48814068  
and Chr18:48816545-48816730

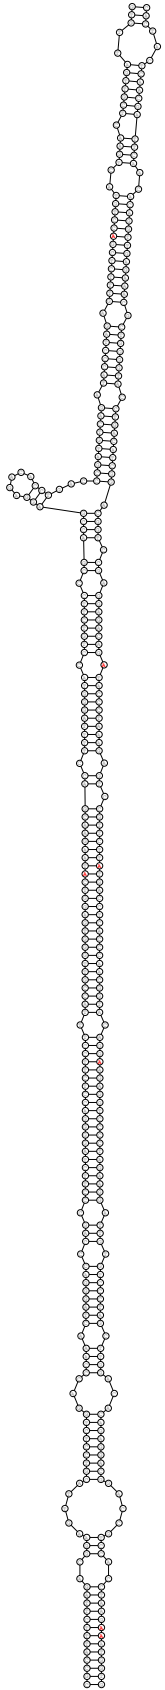

**SHAPE >= 0.85**

78

**0.85 > SHAPE >= 0.4**

**0.4 > SHAPE**

No Data

**ENERGY = -269.9 Chr18:48813872-4881...**

# EIF3M

Strands Chr15:64103595-64103668  
and Chr15:64105025-64105098

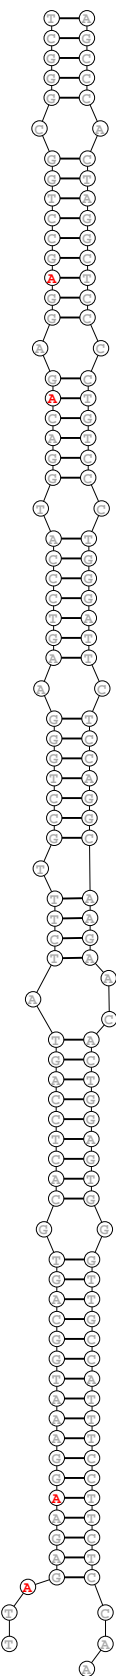

**SHAPE  $\geq 0.85$**

79

**0.85 > SHAPE  $\geq 0.4$**

**0.4 > SHAPE**

No Data

**ENERGY = -115.3 Chr15:64103595-6410...**

# ELF5 part A

Strands Chr15:65829157-65829306  
and Chr15:65834544-65834694

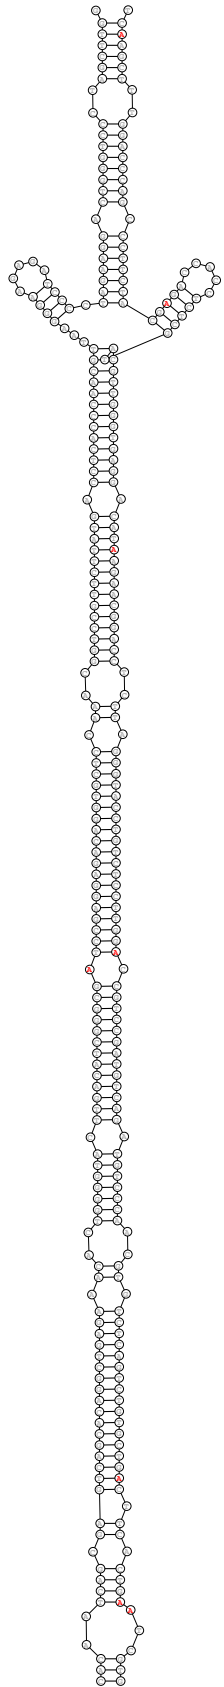

**SHAPE  $\geq 0.85$**

80

**0.85 > SHAPE  $\geq 0.4$**

**0.4 > SHAPE**

No Data

**ENERGY = -209.1 Chr15:65829157-6582...**



# ELF5 part B

Strands Chr15:65834491-65834717  
and Chr15:65836360-65836580

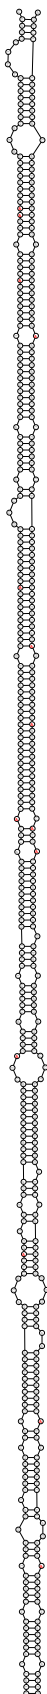

**SHAPE >= 0.85**

81

**0.85 > SHAPE >= 0.4**

**0.4 > SHAPE**

No Data

**ENERGY = -305.7 Chr15:65834491-6583...**

# ELF5 part C

Strands Chr15:65836602-65836698  
and Chr15:65836940-65837051

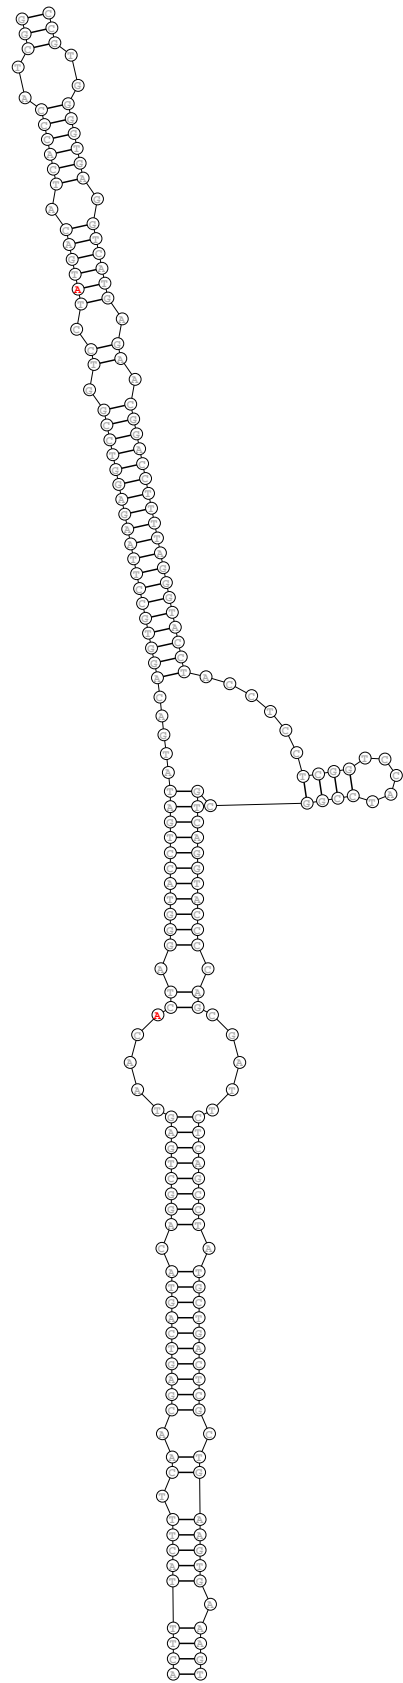

**SHAPE  $\geq$  0.85**

82

**0.85 > SHAPE  $\geq$  0.4**

**0.4 > SHAPE**

No Data

**ENERGY = -122.9 Chr15:65836602-6583...**

ELMOD3 part A

Strands Chr11:49444161-49444359  
and Chr11:49444966-49445128

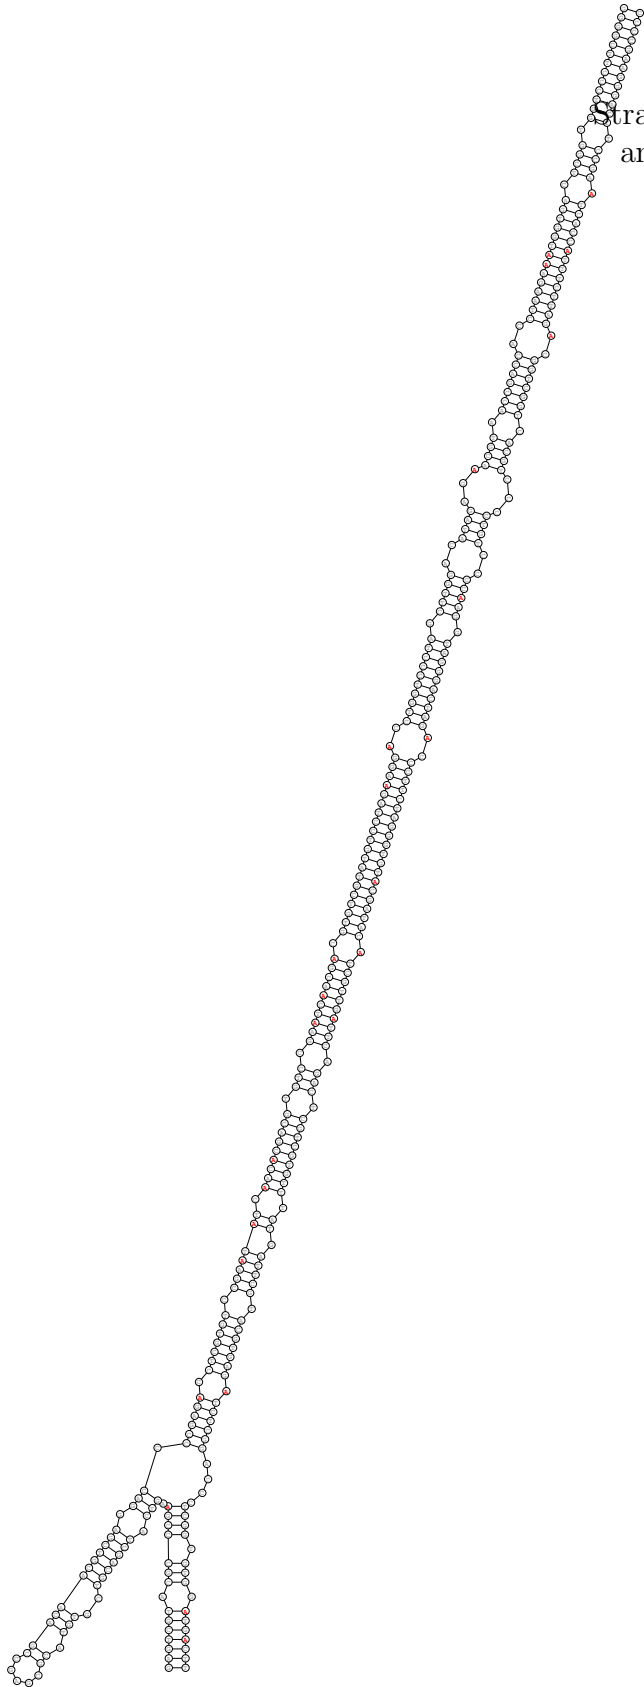

**SHAPE >= 0.85**

83

**0.85 > SHAPE >= 0.4**

**0.4 > SHAPE**

No Data

**ENERGY = -226.5 Chr11:49444161-4944...**

# ELMOD3 part B

Strands Chr11:49445119-49445369  
and Chr11:49445727-49445979

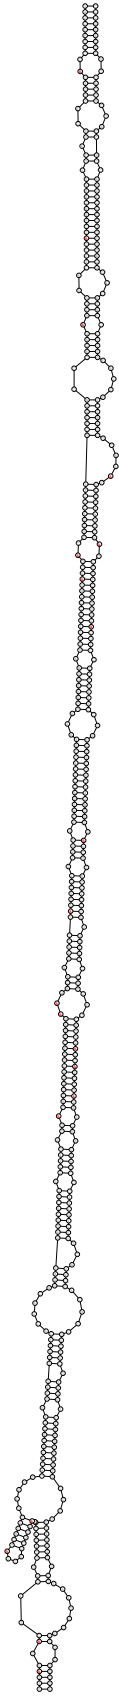

**SHAPE >= 0.85**

84

**0.85 > SHAPE >= 0.4**

**0.4 > SHAPE**

No Data

**ENERGY = -285.0 Chr11:49445119-4944...**

# ELMOD3 part C

Strands Chr11:49445766-49445948  
and Chr11:49448539-49448724

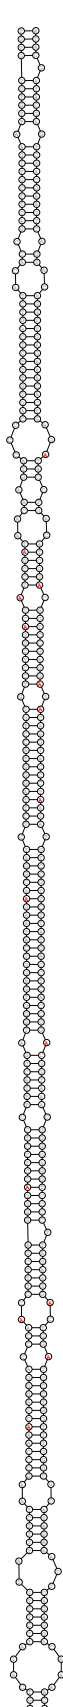

**SHAPE >= 0.85**

85

**0.85 > SHAPE >= 0.4**

**0.4 > SHAPE**

No Data

**ENERGY = -253.8 Chr11:49445766-4944...**

# ELMOD3 part D

Strands Chr11:49445726-49445955  
and Chr11:49449336-49449562

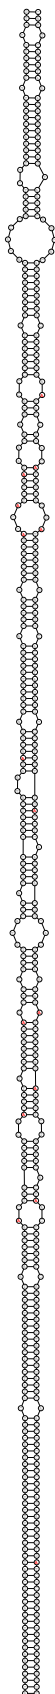

**SHAPE >= 0.85**

86

**0.85 > SHAPE >= 0.4**

**0.4 > SHAPE**

No Data

**ENERGY = -311.7 Chr11:49445726-4944...**

# ELMOD3 part E

Strands Chr11:49450334-49450424  
and Chr11:49450772-49450867

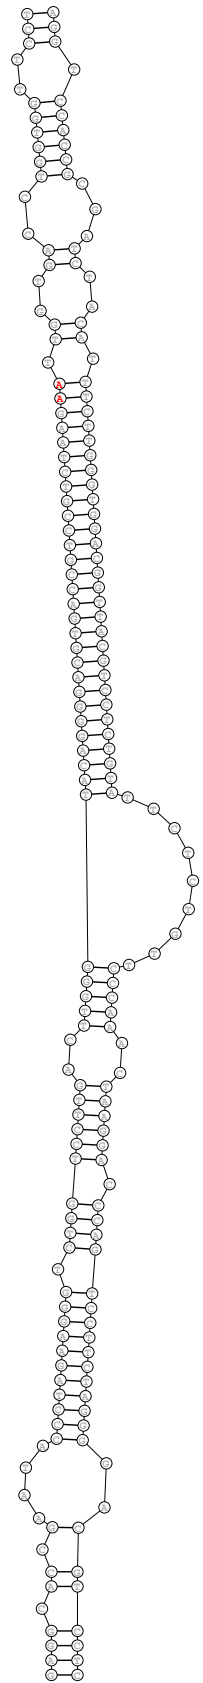

**SHAPE >= 0.85**

87

**0.85 > SHAPE >= 0.4**

**0.4 > SHAPE**

No Data

**ENERGY = -109.1 Chr11:49450334-4945...**

# ELMOD3 part F

Strands Chr11:49449348-49449556  
and Chr11:49450772-49450981

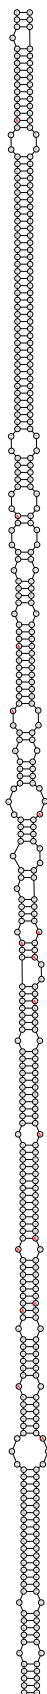

**SHAPE >= 0.85**

88

**0.85 > SHAPE >= 0.4**

**0.4 > SHAPE**

No Data

**ENERGY = -308.6 Chr11:49449348-4944...**



# ELMOD3 part G

Strands Chr11:49444034-49444194  
and Chr11:49445344-49445471

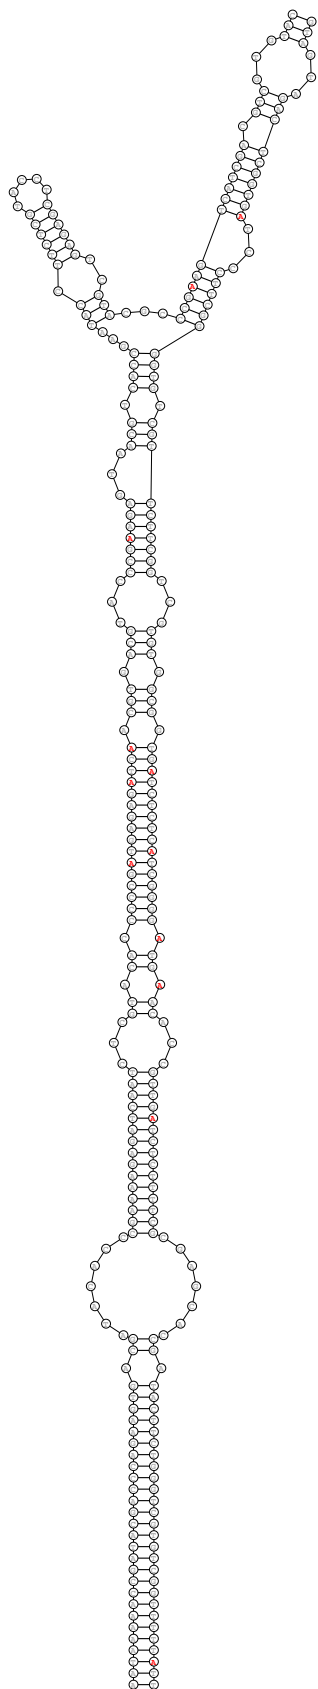

**SHAPE >= 0.85**

89

**0.85 > SHAPE >= 0.4**

**0.4 > SHAPE**

No Data

**ENERGY = -154.6 Chr11:49444034-4944...**

# ELMOD3 part H

Strands Chr11:49448728-49448817  
and Chr11:49450340-49450425

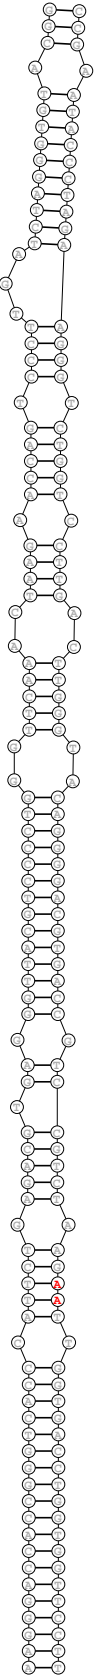

**SHAPE >= 0.85**

90

**0.85 > SHAPE >= 0.4**

**0.4 > SHAPE**

No Data

**ENERGY = -126.4 Chr11:49448728-4944...**

# ENO4

Strands Chr26:37581183-37581222  
and Chr26:37582673-37582712

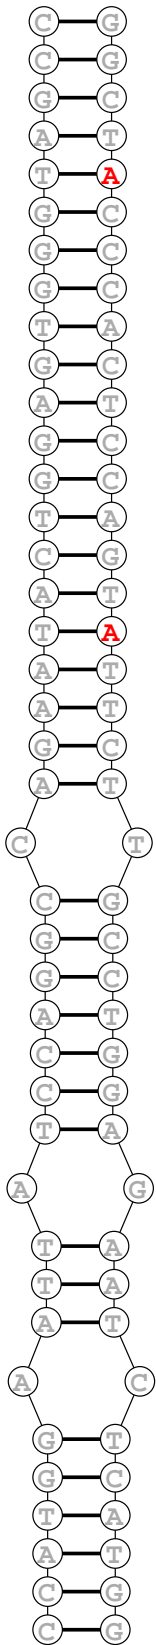

**SHAPE >= 0.85**

91

**0.85 > SHAPE >= 0.4**

**0.4 > SHAPE**

No Data

**ENERGY = -64.8 Chr26:37581183-37581...**

ENSBTAG00000002633

Strands Chr19:55122563-55122658  
and Chr19:55123391-55123485

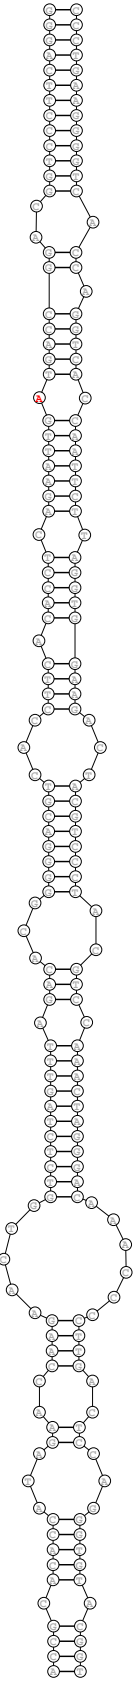

**SHAPE >= 0.85**

92

**0.85 > SHAPE >= 0.4**

**0.4 > SHAPE**

No Data

**ENERGY = -102.7 Chr19:55122563-5512...**

ENSBTAG00000016957

Strands Chr8:112133144-112133249  
and Chr8:112133596-112133702

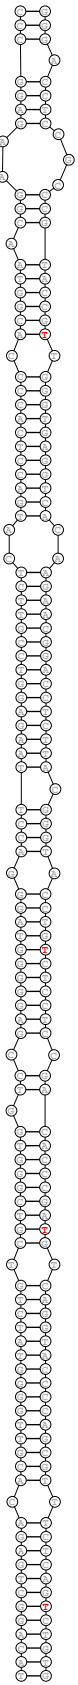

**SHAPE >= 0.85**

93

**0.85 > SHAPE >= 0.4**

**0.4 > SHAPE**

No Data

**ENERGY = -166.7 Chr8:112133144-1121...**

ENSBTAG00000018057

Strands Chr22:13380889-13380975  
and Chr22:13381497-13381578

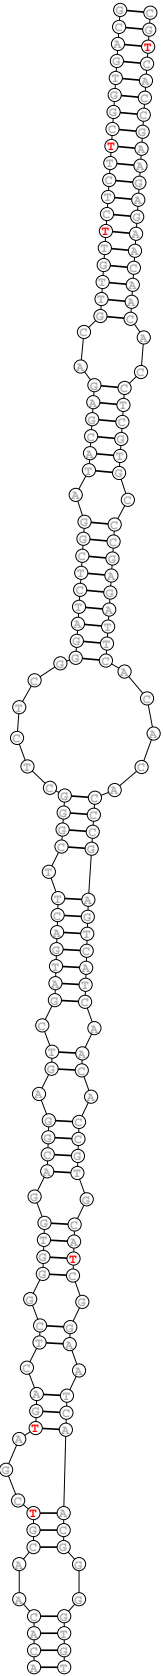

**SHAPE >= 0.85**

94

**0.85 > SHAPE >= 0.4**

**0.4 > SHAPE**

No Data

**ENERGY = -105.1 Chr22:13380889-1338...**

ENSBTAG00000040392 part A

Strands Chr18:61210742-61210935  
and Chr18:61211687-61211880

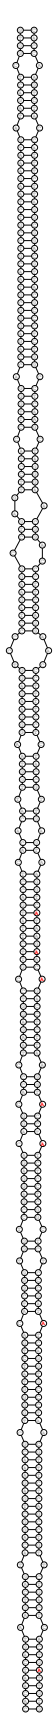

**SHAPE >= 0.85**

95

**0.85 > SHAPE >= 0.4**

**0.4 > SHAPE**

No Data

**ENERGY = -279.8 Chr18:61210742-6121...**

ENSBTAG00000040392 part B

Strands Chr18:61211948-61212101  
and Chr18:61212312-61212475

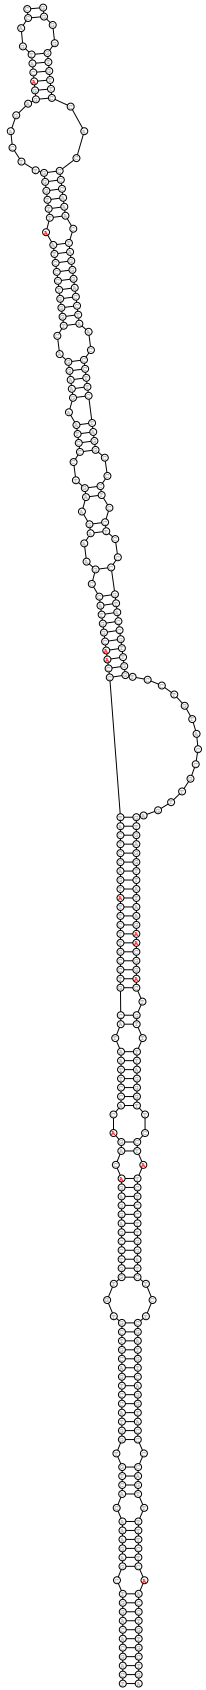

**SHAPE >= 0.85**

96

**0.85 > SHAPE >= 0.4**

**0.4 > SHAPE**

No Data

**ENERGY = -191.5 Chr18:61211948-6121...**



ENSBTAG00000046117

Strands Chr11:63370198-63370298  
and Chr11:63370491-63370591

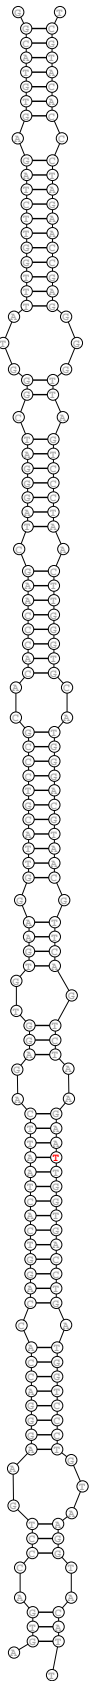

**SHAPE >= 0.85**

97

**0.85 > SHAPE >= 0.4**

**0.4 > SHAPE**

No Data

**ENERGY = -127.5 Chr11:63370198-6337...**

ENSBTAG00000046547

Strands Chr24:43218218-43218341  
and Chr24:43219844-43219967

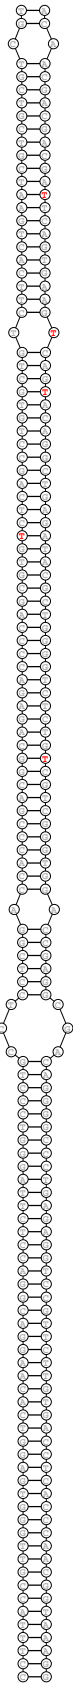

**SHAPE >= 0.85**

98

**0.85 > SHAPE >= 0.4**

**0.4 > SHAPE**

No Data

**ENERGY = -249.6 Chr24:43218218-4321...**

# EXOSC1

Strands Chr26:18527446-18527570  
and Chr26:18528046-18528163

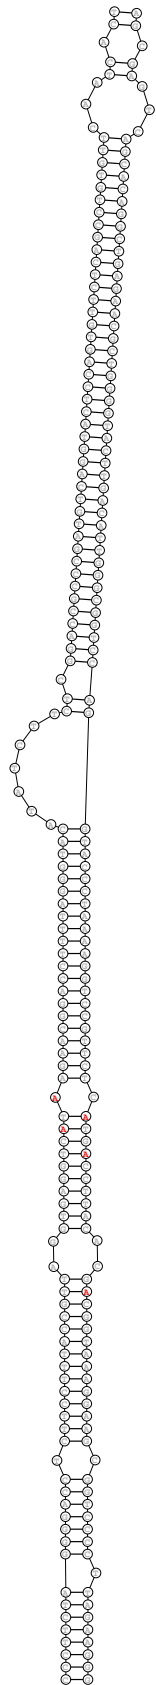

**SHAPE >= 0.85**

99

**0.85 > SHAPE >= 0.4**

**0.4 > SHAPE**

No Data

**ENERGY = -199.5 Chr26:18527446-1852...**

# EXOSC7

Strands Chr22:54829726-54829853  
and Chr22:54830086-54830211

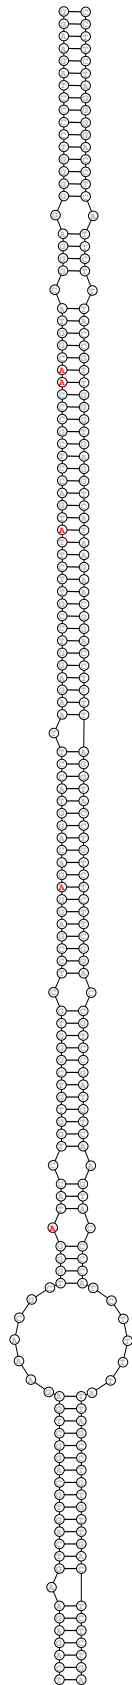

**SHAPE >= 0.85**

100

**0.85 > SHAPE >= 0.4**

**0.4 > SHAPE**

No Data

**ENERGY = -194.5 Chr22:54829726-5482...**

# EXOSC9

Strands Chr6:3420513-3420608  
and Chr6:3421269-3421364

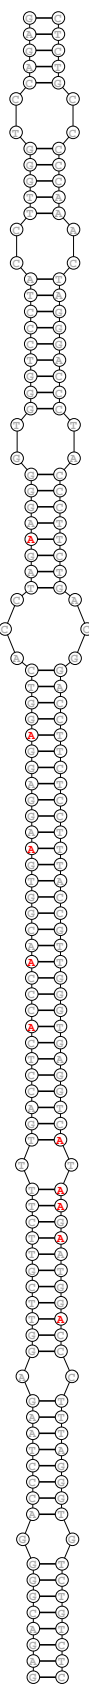

**SHAPE  $\geq$  0.85**

101

**0.85 > SHAPE  $\geq$  0.4**

**0.4 > SHAPE**

No Data

**ENERGY = -152.3 Chr6:3420513-342060...**

# FAM134B

Strands Chr20:56756863-56756945  
and Chr20:56757568-56757649

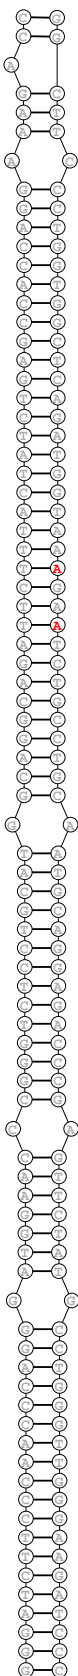

**SHAPE  $\geq 0.85$**

102

**0.85 > SHAPE  $\geq 0.4$**

**0.4 > SHAPE**

No Data

**ENERGY = -156.0 Chr20:56756863-5675...**

FAM73B part A

Strands Chr11:99537149-99537255  
and Chr11:99538003-99538111

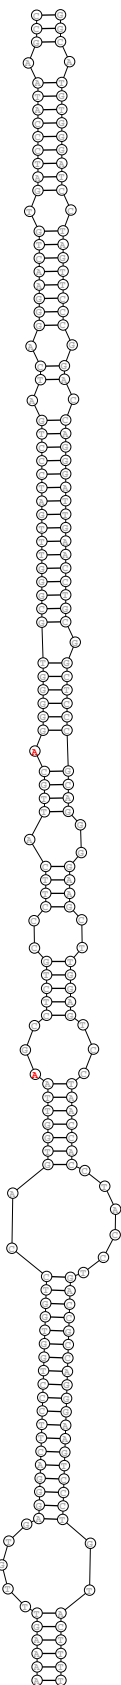

**SHAPE >= 0.85**

103

**0.85 > SHAPE >= 0.4**

**0.4 > SHAPE**

No Data

**ENERGY = -138.0 Chr11:99537149-9953...**

FAM73B part B

Strands Chr11:99536950-99537071  
and Chr11:99538765-99538886

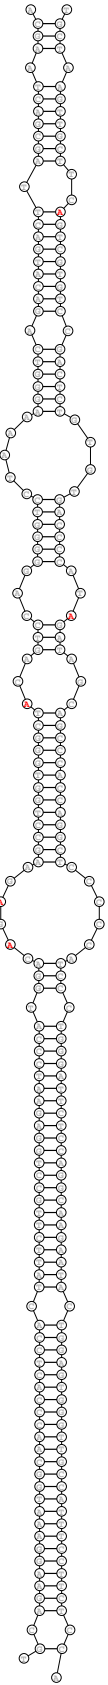

**SHAPE >= 0.85**

104

**0.85 > SHAPE >= 0.4**

**0.4 > SHAPE**

No Data

**ENERGY = -175.3 Chr11:99536950-9953...**



# FAM73B part C

Strands Chr11:99538769-99538885  
and Chr11:99539830-99539930

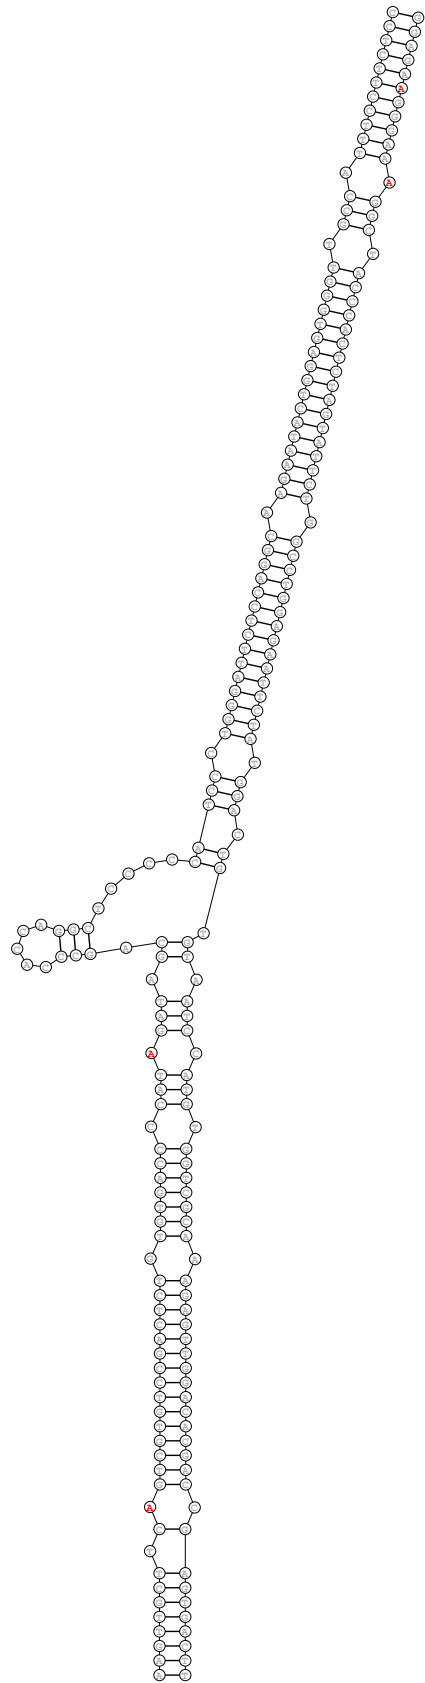

**SHAPE  $\geq$  0.85**

105

**0.85 > SHAPE  $\geq$  0.4**

**0.4 > SHAPE**

No Data

**ENERGY = -141.6 Chr11:99538769-9953...**

# FAM73B part D

Strands Chr11:99539788-99539934  
and Chr11:99540172-99540332

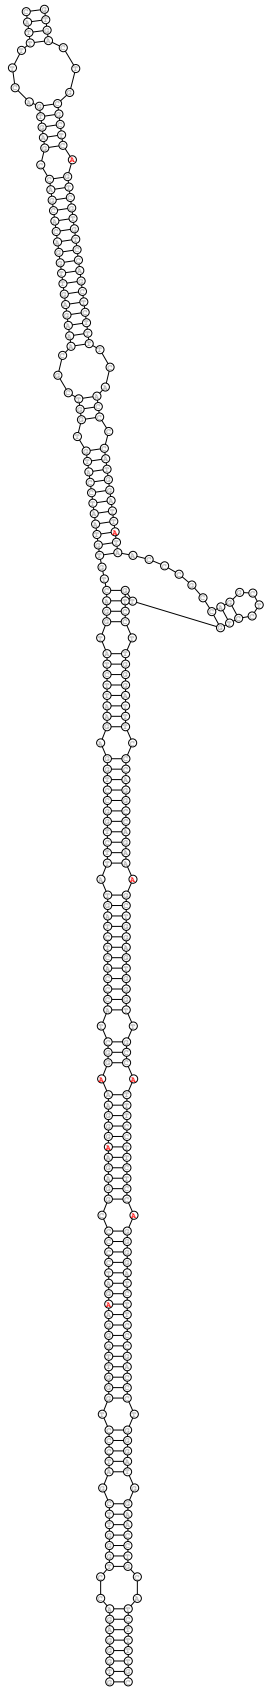

**SHAPE  $\geq 0.85$**

106

**0.85 > SHAPE  $\geq 0.4$**

**0.4 > SHAPE**

No Data

**ENERGY = -207.7 Chr11:99539788-9953...**

# FASTK

Strands Chr4:114454600-114454662  
and Chr4:114454738-114454795

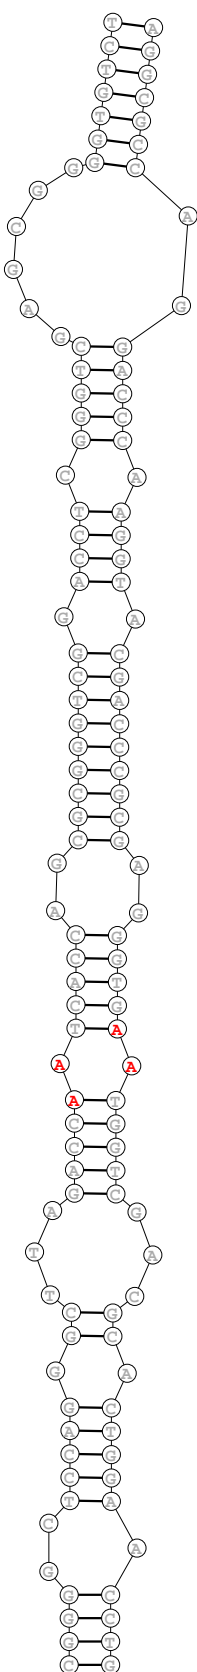

**SHAPE  $\geq$  0.85**

107

**0.85 > SHAPE  $\geq$  0.4**

**0.4 > SHAPE**

No Data

**ENERGY = -79.5 Chr4:114454600-11445...**

# FBXW12

Strands Chr8:91670639-91670727  
and Chr8:91670762-91670847

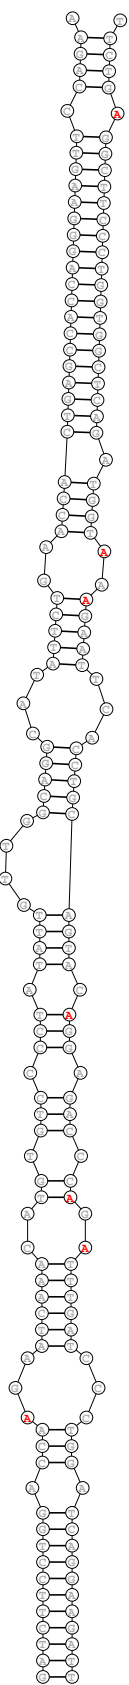

**SHAPE  $\geq 0.85$**

108

**0.85 > SHAPE  $\geq 0.4$**

**0.4 > SHAPE**

No Data

**ENERGY = -97.0 Chr8:91670639-916707...**

# FBXW8

Strands Chr17:60340398-60340485  
and Chr17:60340982-60341066

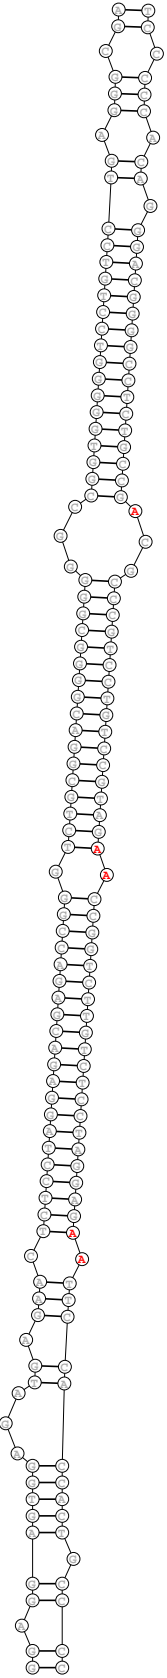

**SHAPE  $\geq 0.85$**

109

**0.85 > SHAPE  $\geq 0.4$**

**0.4 > SHAPE**

No Data

**ENERGY = -135.7 Chr17:60340398-6034...**

# FLNB part A

Strands Chr22:43703664-43703770  
and Chr22:43704005-43704108

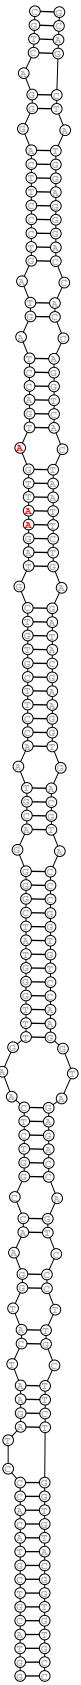

**SHAPE  $\geq 0.85$**

110

**0.85 > SHAPE  $\geq 0.4$**

**0.4 > SHAPE**

No Data

**ENERGY = -128.1 Chr22:43703664-4370...**

# FUT11 part A

Strands Chr28:29839014-29839065  
and Chr28:29839101-29839151

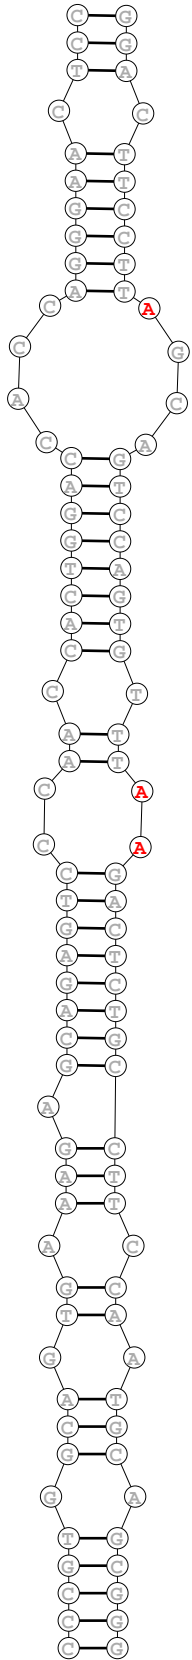

**SHAPE >= 0.85**

111

**0.85 > SHAPE >= 0.4**

**0.4 > SHAPE**

No Data

**ENERGY = -54.2 Chr28:29839014-29839...**

# FUT11 part B

Strands Chr28:29838972-29838990  
and Chr28:29839181-29839199

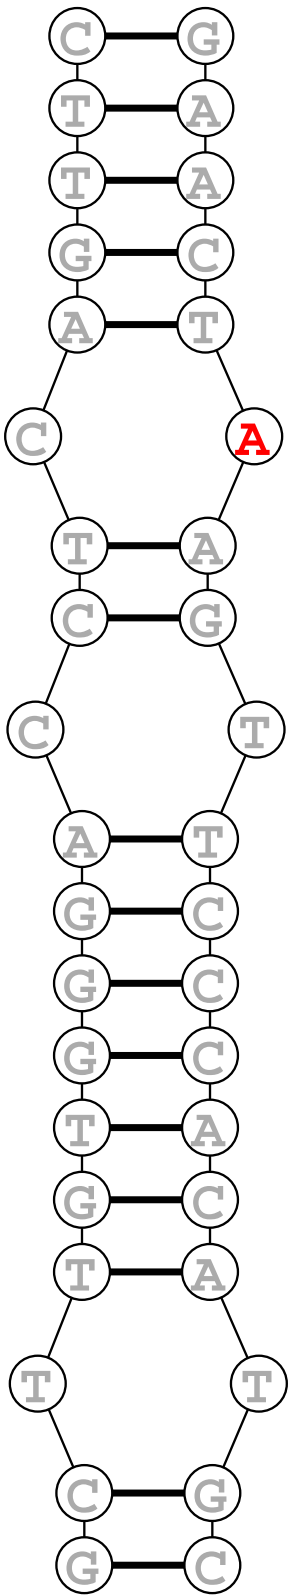

**SHAPE >= 0.85**

112

**0.85 > SHAPE >= 0.4**

**0.4 > SHAPE**

No Data

**ENERGY = -20.5 Chr28:29838972-29838...**



# GGT1 part A

Strands Chr17:73443267-73443463  
and Chr17:73444301-73444515

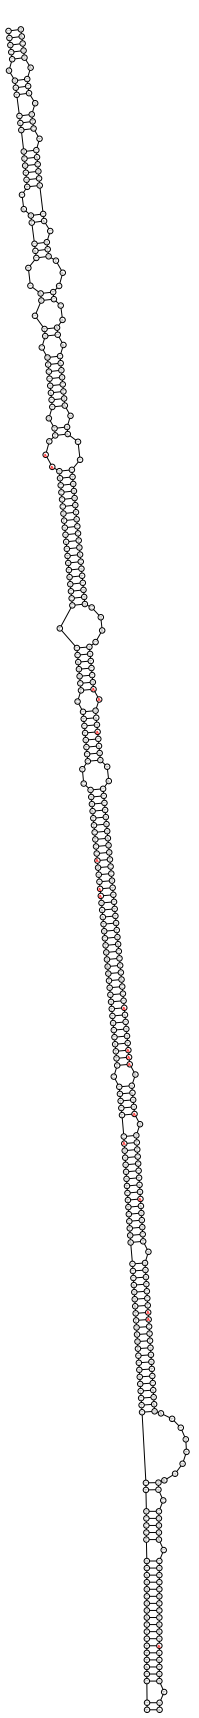

**SHAPE >= 0.85**

113

**0.85 > SHAPE >= 0.4**

**0.4 > SHAPE**

No Data

**ENERGY = -318.6 Chr17:73443267-7344...**

# GGT1 part B

Strands Chr17:73443267-73443454  
and Chr17:73445603-73445787

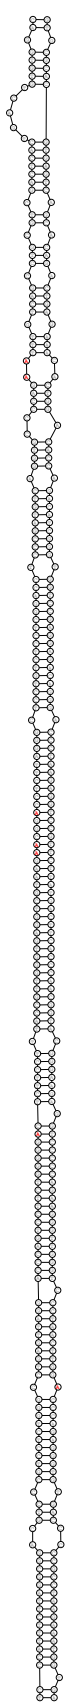

**SHAPE >= 0.85**

114

**0.85 > SHAPE >= 0.4**

**0.4 > SHAPE**

No Data

**ENERGY = -298.0 Chr17:73443267-7344...**

# GPAM

Strands Chr26:32977076-32977251  
and Chr26:32977800-32977990

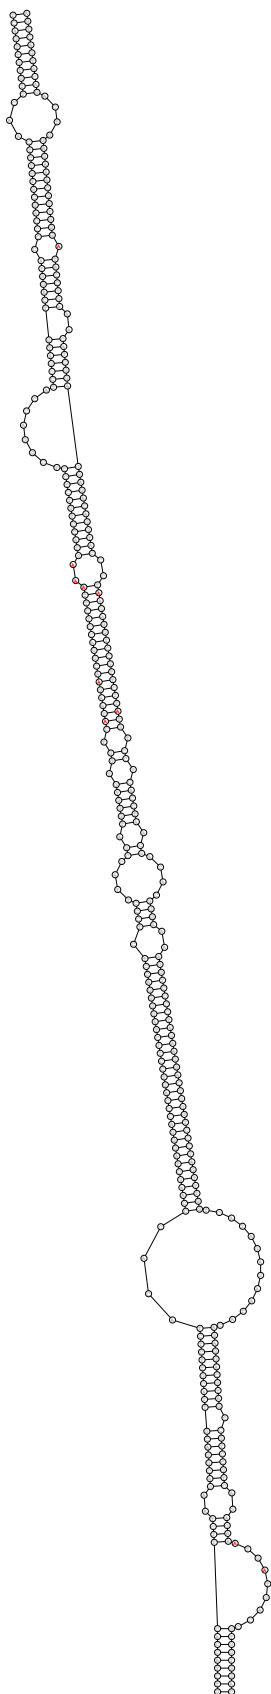

**SHAPE  $\geq$  0.85**

115

**0.85 > SHAPE  $\geq$  0.4**

**0.4 > SHAPE**

No Data

**ENERGY = -248.2 Chr26:32977076-3297...**

# GPBP1L1

Strands Chr3:101046391-101046477  
and Chr3:101047403-101047489

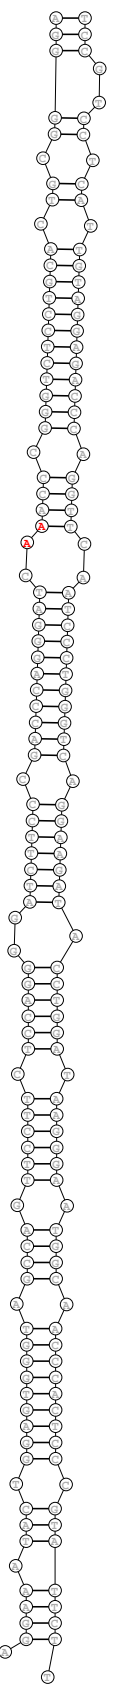

**SHAPE  $\geq$  0.85**

116

**0.85 > SHAPE  $\geq$  0.4**

**0.4 > SHAPE**

No Data

**ENERGY = -121.3 Chr3:101046391-1010...**

# GPRC5C

Strands Chr19:57649872-57649984  
and Chr19:57653168-57653282

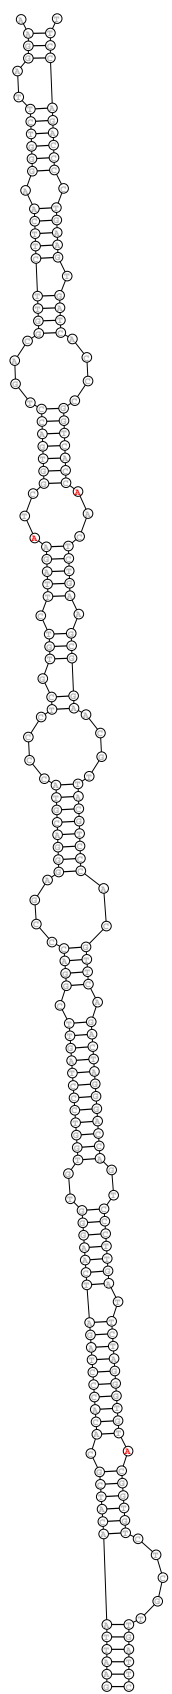

**SHAPE  $\geq 0.85$**

117

**0.85 > SHAPE  $\geq 0.4$**

**0.4 > SHAPE**

No Data

**ENERGY = -122.0 Chr19:57649872-5764...**

# GTF2H5

Strands Chr9:96165890-96166017  
and Chr9:96167397-96167526

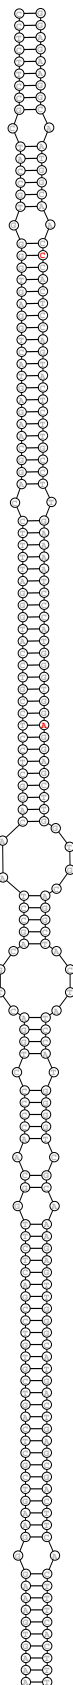

**SHAPE >= 0.85**

118

**0.85 > SHAPE >= 0.4**

**0.4 > SHAPE**

No Data

**ENERGY = -211.6 Chr9:96165890-96166...**

# HAPLN3 part A

Strands Chr21:20881003-20881180  
and Chr21:20881565-20881738

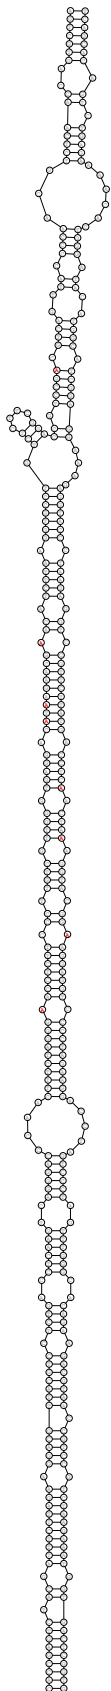

**SHAPE >= 0.85**

119

**0.85 > SHAPE >= 0.4**

**0.4 > SHAPE**

No Data

**ENERGY = -181.2 Chr21:20881003-2088...**

# HAPLN3 part B

Strands Chr21:20881055-20881172  
and Chr21:20882476-20882596

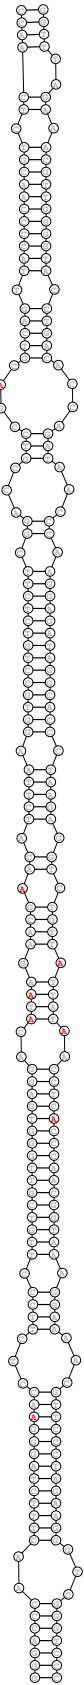

**SHAPE  $\geq$  0.85**

120

**0.85 > SHAPE  $\geq$  0.4**

**0.4 > SHAPE**

No Data

**ENERGY = -139.1 Chr21:20881055-2088...**



# HAPLN3 part C

Strands Chr21:20881683-20881749  
and Chr21:20882189-20882255

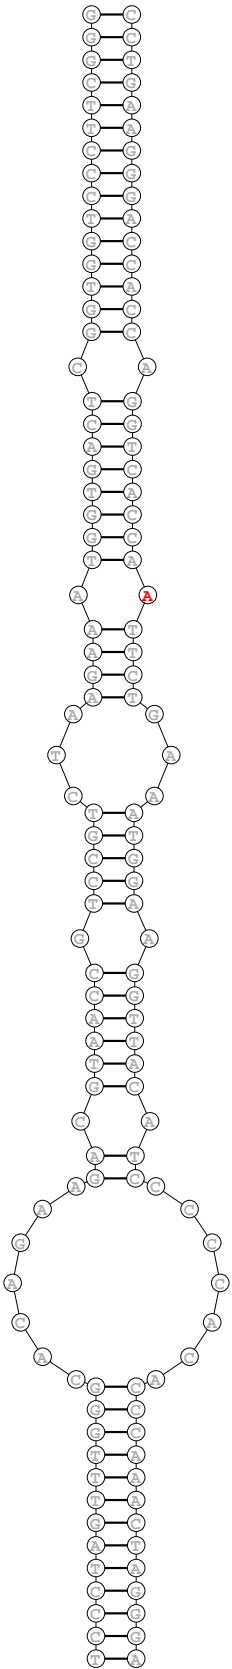

**SHAPE >= 0.85**

121

**0.85 > SHAPE >= 0.4**

**0.4 > SHAPE**

No Data

**ENERGY = -88.6 Chr21:20881683-20881...**

# HAPLN3 part D

Strands Chr21:20882474-20882656  
and Chr21:20883428-20883619

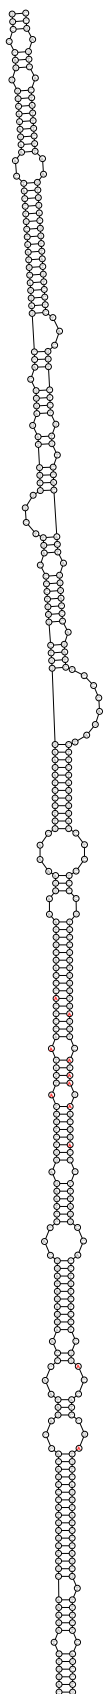

**SHAPE >= 0.85**

122

**0.85 > SHAPE >= 0.4**

**0.4 > SHAPE**

No Data

**ENERGY = -228.7 Chr21:20882474-2088...**

# HBP1

Strands Chr4:48571946-48572071  
and Chr4:48572768-48572884

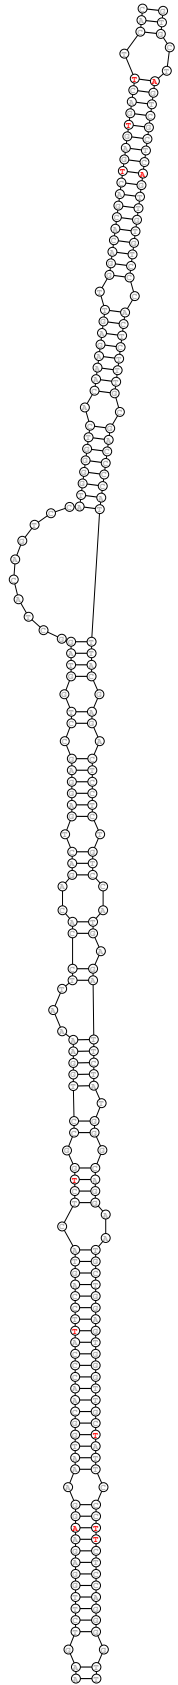

**SHAPE >= 0.85**

123

**0.85 > SHAPE >= 0.4**

**0.4 > SHAPE**

No Data

**ENERGY = -152.6 Chr4:48571946-48572...**

# HERPUD2

Strands Chr4:61842415-61842506  
and Chr4:61842800-61842893

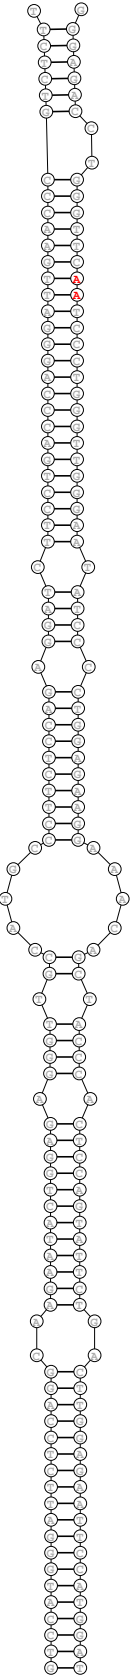

**SHAPE >= 0.85**

124

**0.85 > SHAPE >= 0.4**

**0.4 > SHAPE**

No Data

**ENERGY = -141.5 Chr4:61842415-61842...**

# HHIPL2 part A

Strands Chr16:26717543-26717683  
and Chr16:26718487-26718611

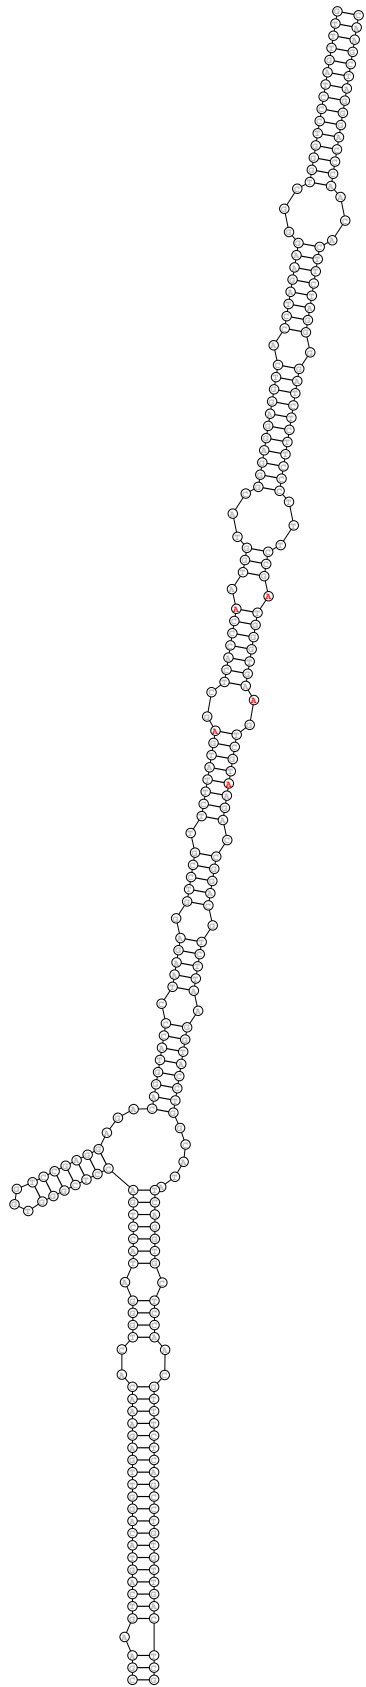

**SHAPE  $\geq$  0.85**

125

**0.85 > SHAPE  $\geq$  0.4**

**0.4 > SHAPE**

No Data

**ENERGY = -180.5 Chr16:26717543-2671...**

# HHIPL2 part B

Strands Chr16:26718460-26718613  
and Chr16:26719823-26719993

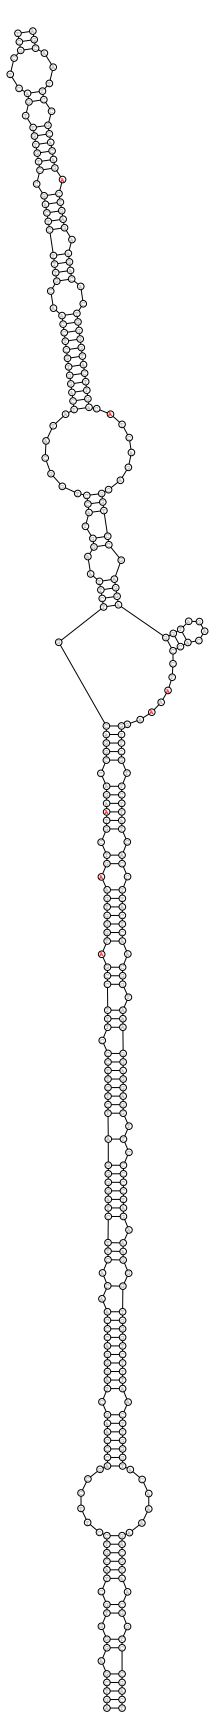

**SHAPE >= 0.85**

126

**0.85 > SHAPE >= 0.4**

**0.4 > SHAPE**

No Data

**ENERGY = -150.5 Chr16:26718460-2671...**

# HMGN3 part A

Strands Chr9:19002391-19002551  
and Chr9:19002575-19002746

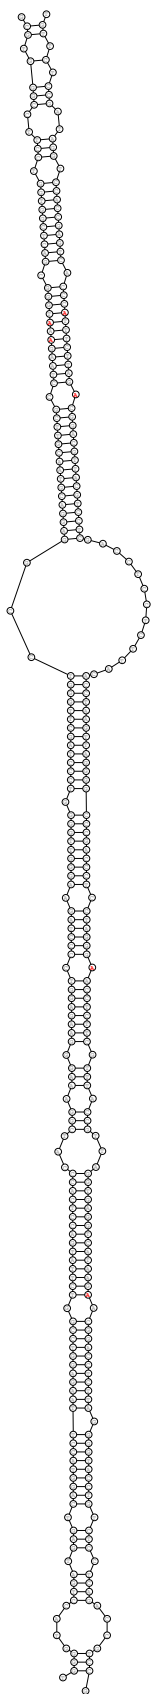

**SHAPE  $\geq$  0.85**

127

**0.85 > SHAPE  $\geq$  0.4**

**0.4 > SHAPE**

No Data

**ENERGY = -237.1 Chr9:19002391-19002...**

# HMGN3 part B

Strands Chr9:19002926-19003017  
and Chr9:19003149-19003240

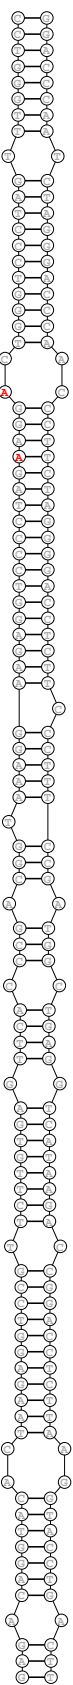

**SHAPE  $\geq$  0.85**

128

**0.85 > SHAPE  $\geq$  0.4**

**0.4 > SHAPE**

No Data

**ENERGY = -142.7 Chr9:19002926-19003...**



# HOOK3

Strands Chr27:37355456-37355530  
and Chr27:37356243-37356316

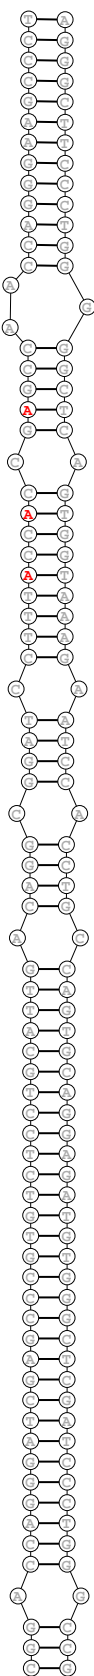

**SHAPE  $\geq 0.85$**

129

**0.85 > SHAPE  $\geq 0.4$**

**0.4 > SHAPE**

No Data

**ENERGY = -131.9 Chr27:37355456-3735...**

# HPSE

Strands Chr6:99861985-99862122  
and Chr6:99862360-99862496

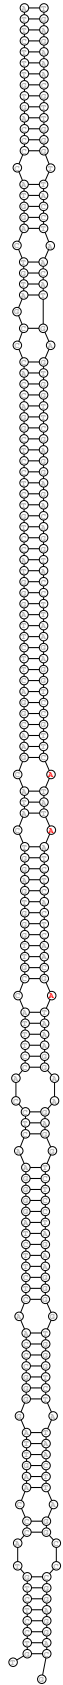

**SHAPE >= 0.85**

130

**0.85 > SHAPE >= 0.4**

**0.4 > SHAPE**

No Data

**ENERGY = -194.2 Chr6:99861985-99862...**

# HSTN

Strands Chr6:87195332-87195432  
and Chr6:87195888-87195988

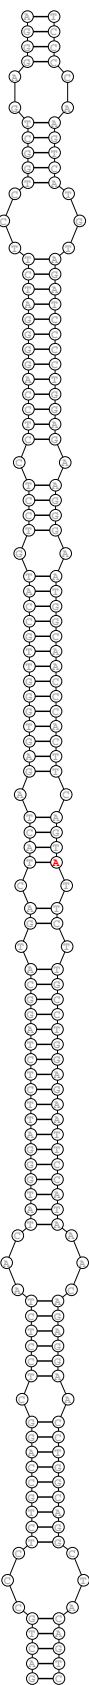

**SHAPE >= 0.85**

131

**0.85 > SHAPE >= 0.4**

**0.4 > SHAPE**

No Data

**ENERGY = -142.6 Chr6:87195332-87195...**

# HTATIP2

Strands Chr29:24809615-24809803  
and Chr29:24810971-24811156

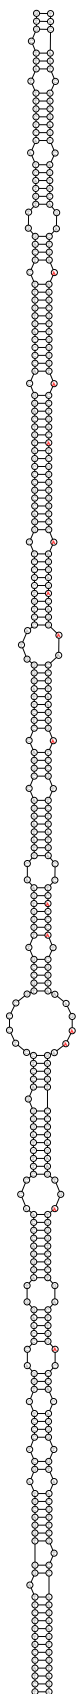

**SHAPE >= 0.85**

132

**0.85 > SHAPE >= 0.4**

**0.4 > SHAPE**

No Data

**ENERGY = -249.2 Chr29:24809615-2480...**

# IAH1 part A

Strands Chr11:87948531-87948671  
and Chr11:87949481-87949622

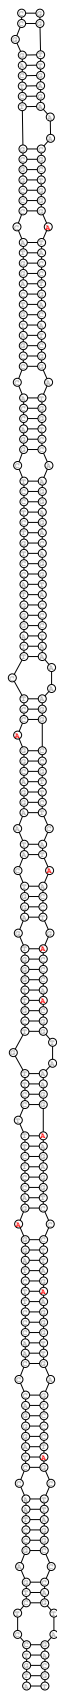

**SHAPE >= 0.85**

133

**0.85 > SHAPE >= 0.4**

**0.4 > SHAPE**

No Data

**ENERGY = -211.8 Chr11:87948531-8794...**

# IAH1 part B

Strands Chr11:87949470-87949664  
and Chr11:87949748-87949925

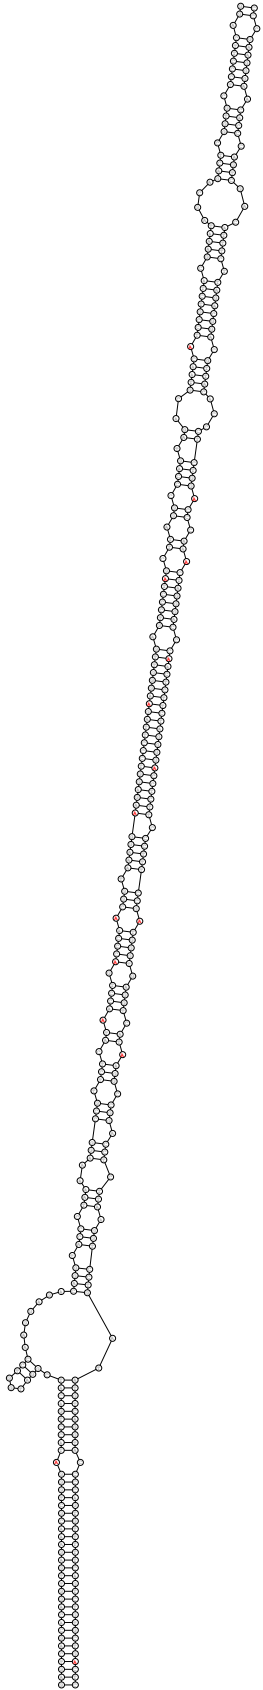

**SHAPE  $\geq$  0.85**

134

**0.85 > SHAPE  $\geq$  0.4**

**0.4 > SHAPE**

No Data

**ENERGY = -228.0 Chr11:87949470-8794...**

# IAH1 part C

Strands Chr11:87949572-87949633  
and Chr11:87949662-87949722

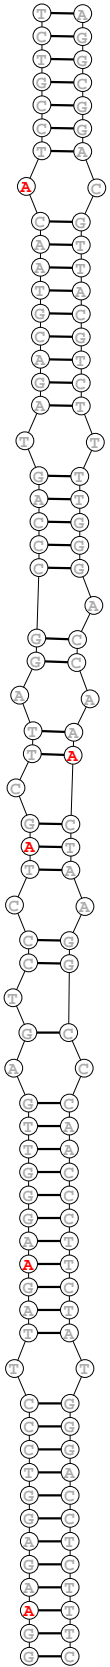

**SHAPE >= 0.85**

135

**0.85 > SHAPE >= 0.4**

**0.4 > SHAPE**

No Data

**ENERGY = -82.2 Chr11:87949572-87949...**

# IFNGR2 part A

Strands Chr1:1377597-1377826  
and Chr1:1378428-1378652

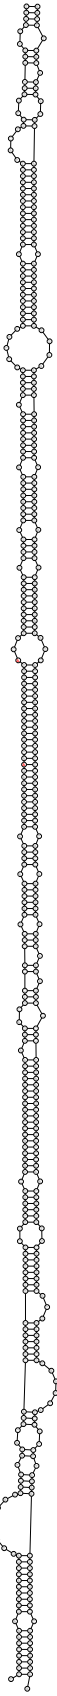

**SHAPE >= 0.85**

136

**0.85 > SHAPE >= 0.4**

**0.4 > SHAPE**

No Data

**ENERGY = -282.3 Chr1:1377597-137782...**



# IFNGR2 part B

Strands Chr1:1378446-1378566  
and Chr1:1380021-1380142

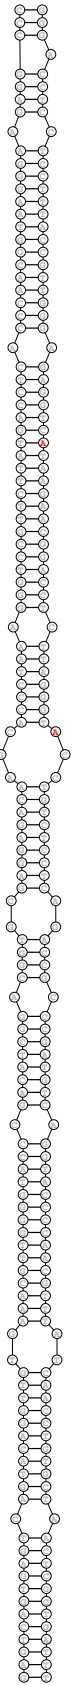

**SHAPE >= 0.85**

137

**0.85 > SHAPE >= 0.4**

**0.4 > SHAPE**

No Data

**ENERGY = -196.9 Chr1:1378446-137856...**

# IFNGR2 part C

Strands Chr1:1380579-1380673  
and Chr1:1383184-1383276

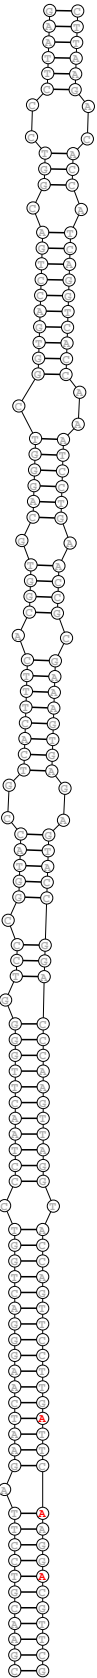

**SHAPE  $\geq 0.85$**

138

**$0.85 > \text{SHAPE} \geq 0.4$**

**$0.4 > \text{SHAPE}$**

No Data

**ENERGY = -138.8 Chr1:1380579-138067...**

# IFNGR2 part D

Strands Chr1:1378524-1378613  
and Chr1:1384463-1384551

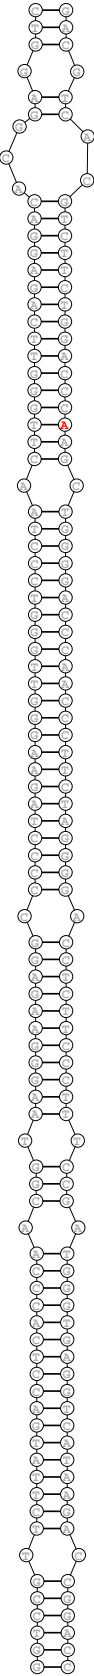

**SHAPE >= 0.85**

139

**0.85 > SHAPE >= 0.4**

**0.4 > SHAPE**

No Data

**ENERGY = -158.4 Chr1:1378524-137861...**

# IFNGR2 part E

Strands Chr1:1383238-1383280  
and Chr1:1385270-1385310

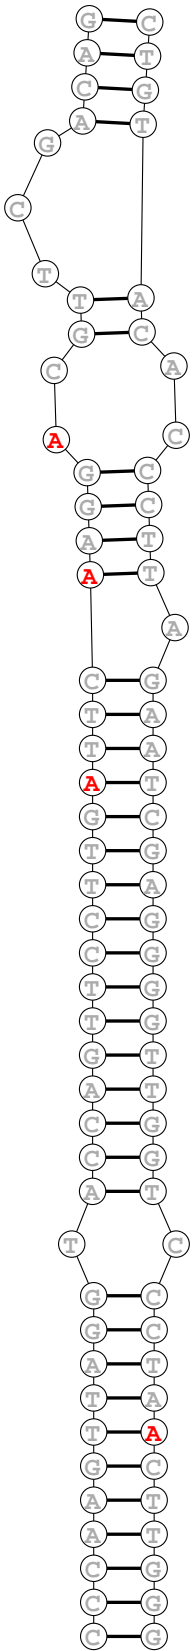

**SHAPE >= 0.85**

140

**0.85 > SHAPE >= 0.4**

**0.4 > SHAPE**

No Data

**ENERGY = -48.5 Chr1:1383238-1383280...**

# INPP5B

Strands Chr3:108646631-108646723  
and Chr3:108647495-108647584

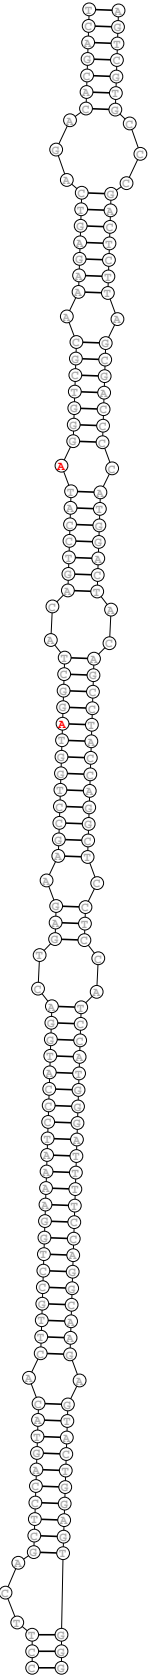

**SHAPE  $\geq$  0.85**

141

**0.85 > SHAPE  $\geq$  0.4**

**0.4 > SHAPE**

No Data

**ENERGY = -142.1 Chr3:108646631-1086...**

# KANK3

Strands Chr7:18202289-18202391  
and Chr7:18202772-18202867

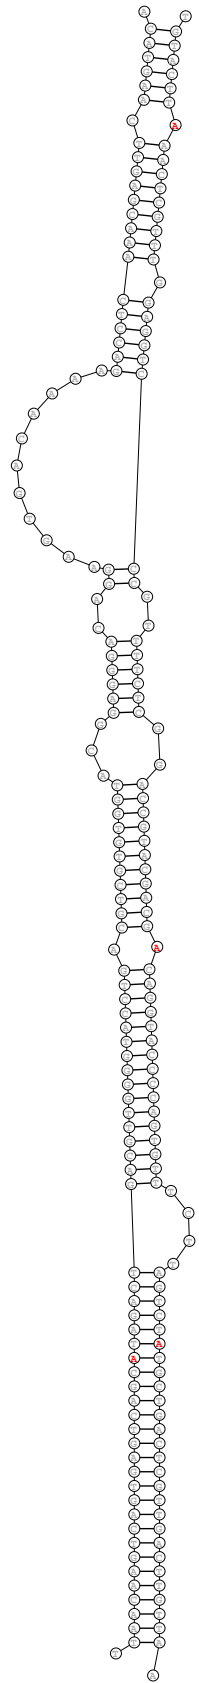

**SHAPE  $\geq$  0.85**

142

**0.85 > SHAPE  $\geq$  0.4**

**0.4 > SHAPE**

No Data

**ENERGY = -121.7 Chr7:18202289-18202...**

# KBTBD5

Strands Chr22:15453954-15454018  
and Chr22:15454097-15454158

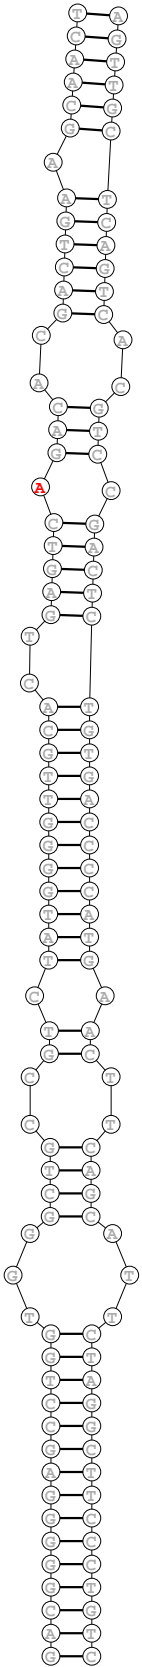

**SHAPE >= 0.85**

143

**0.85 > SHAPE >= 0.4**

**0.4 > SHAPE**

No Data

**ENERGY = -83.4 Chr22:15453954-15454...**

# KIAA1161

Strands Chr8:77084137-77084349  
and Chr8:77086034-77086244

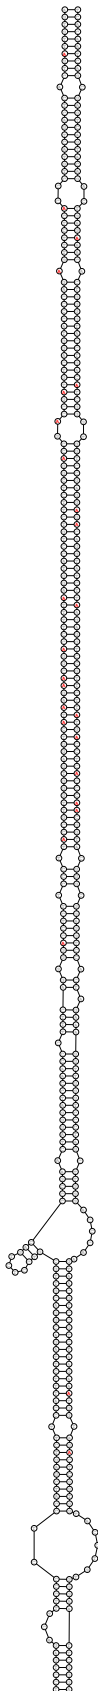

**SHAPE >= 0.85**

144

**0.85 > SHAPE >= 0.4**

**0.4 > SHAPE**

No Data

**ENERGY = -338.7 Chr8:77084137-77084...**



# KIN part A

Strands Chr13:16208706-16208914  
and Chr13:16208991-16209205

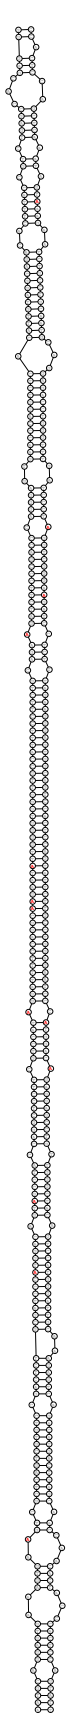

**SHAPE >= 0.85**

145

**0.85 > SHAPE >= 0.4**

**0.4 > SHAPE**

No Data

**ENERGY = -311.4 Chr13:16208706-1620...**

# KIN part B

Strands Chr13:16208664-16208694  
and Chr13:16208892-16208923

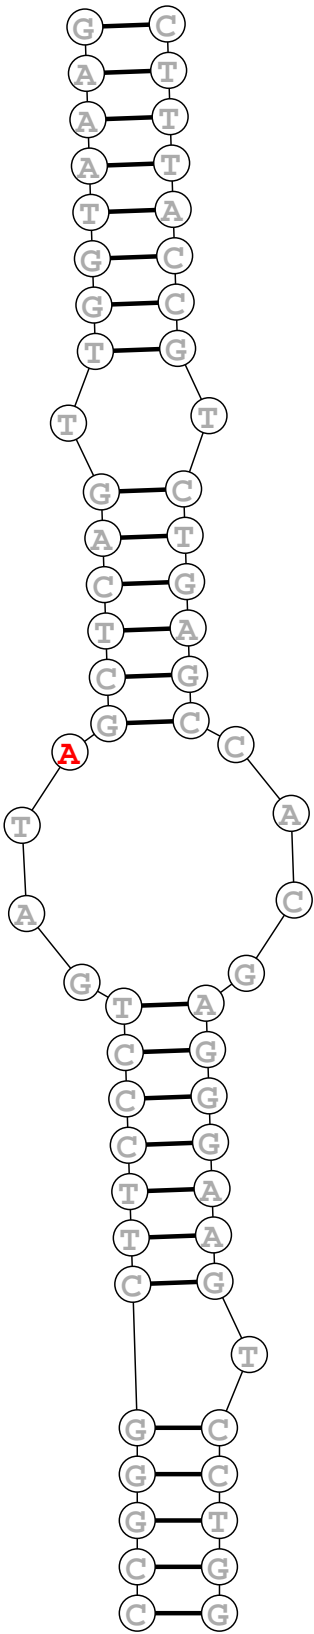

**SHAPE >= 0.85**

**0.85 > SHAPE >= 0.4**

**0.4 > SHAPE**

No Data

**ENERGY = -40.4 Chr13:16208664-16208...**

# KIN part C

Strands Chr13:16208811-16208860  
and Chr13:16208950-16208999

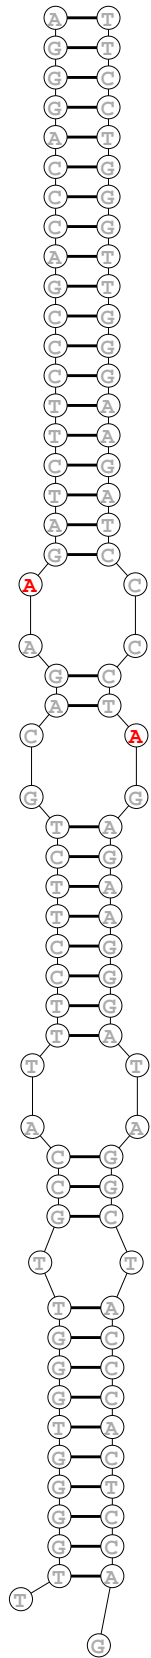

**SHAPE >= 0.85**

147

**0.85 > SHAPE >= 0.4**

**0.4 > SHAPE**

No Data

**ENERGY = -75.1 Chr13:16208811-16208...**

# KIN part D

Strands Chr13:16208738-16208920  
and Chr13:16209209-16209373

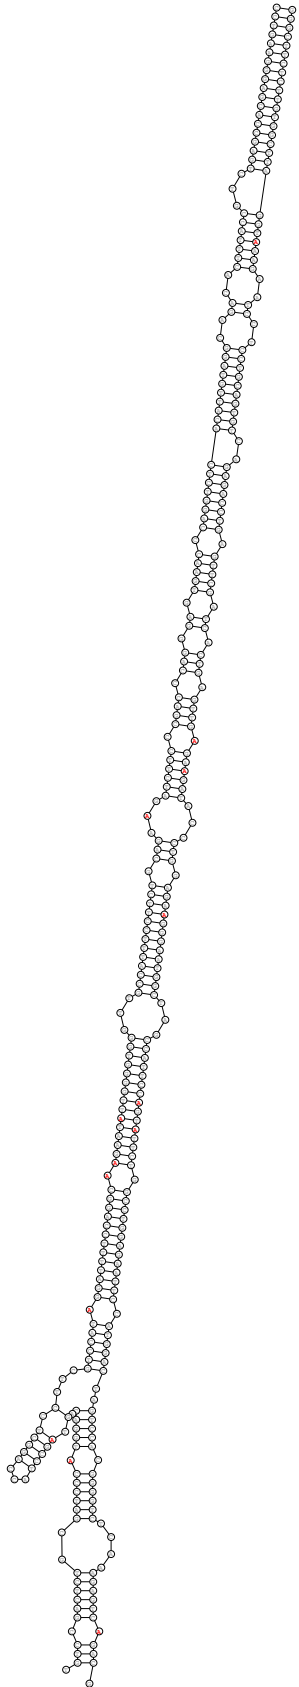

**SHAPE  $\geq$  0.85**

148

**0.85 > SHAPE  $\geq$  0.4**

**0.4 > SHAPE**

No Data

**ENERGY = -213.3 Chr13:16208738-1620...**

# KRT15

Strands Chr19:42357325-42357441  
and Chr19:42357449-42357573

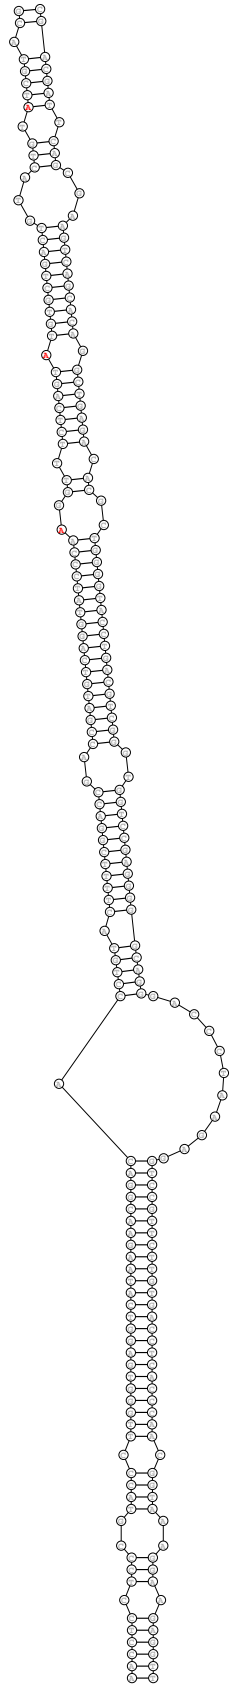

**SHAPE  $\geq$  0.85**

149

**0.85 > SHAPE  $\geq$  0.4**

**0.4 > SHAPE**

No Data

**ENERGY = -167.5 Chr19:42357325-4235...**

# LMAN2L part A

Strands Chr11:2647272-2647479  
and Chr11:2649888-2650095

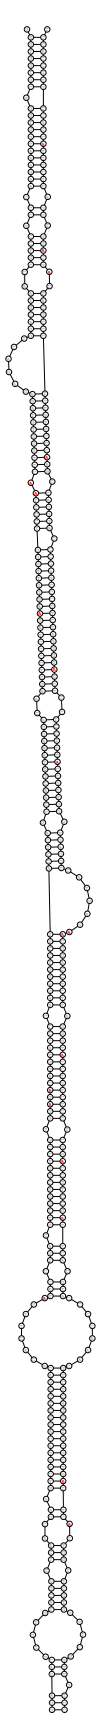

**SHAPE >= 0.85**

150

**0.85 > SHAPE >= 0.4**

**0.4 > SHAPE**

No Data

**ENERGY = -291.8 Chr11:2647272-26474...**

# LMAN2L part B

Strands Chr11:2649887-2650088  
and Chr11:2650718-2650914

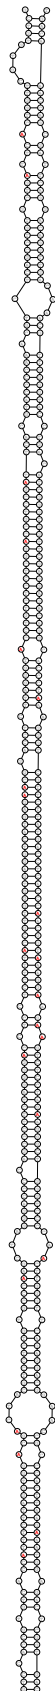

**SHAPE >= 0.85**

151

**0.85 > SHAPE >= 0.4**

**0.4 > SHAPE**

No Data

**ENERGY = -306.0 Chr11:2649887-26500...**

LOC515042

Strands Chr2:131413149-131413195  
and Chr2:131413620-131413666

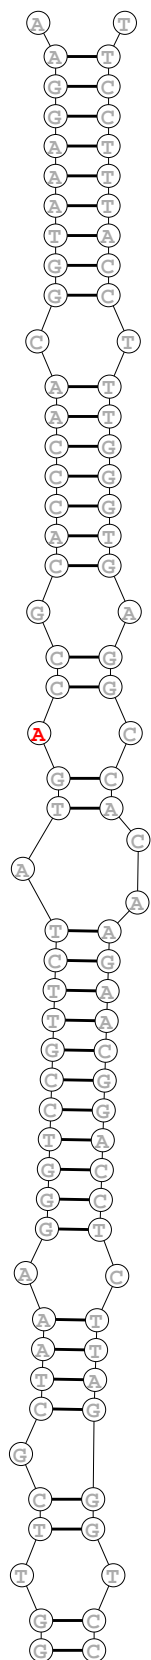

**SHAPE >= 0.85**

152

**0.85 > SHAPE >= 0.4**

**0.4 > SHAPE**

No Data

**ENERGY = -55.3 Chr2:131413149-13141...**



# LPL

Strands Chr8:67506972-67507079  
and Chr8:67508343-67508450

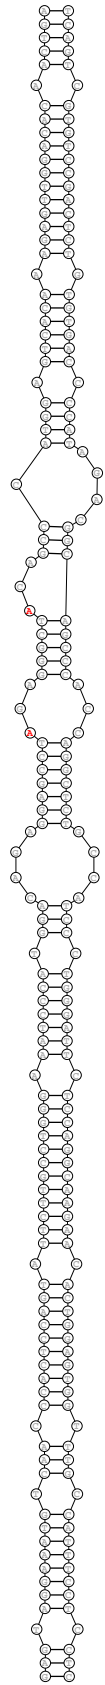

**SHAPE >= 0.85**

153

**0.85 > SHAPE >= 0.4**

**0.4 > SHAPE**

No Data

**ENERGY = -139.7 Chr8:67506972-67507...**

# LPO part A

Strands Chr19:9442989-9443209  
and Chr19:9446268-9446496

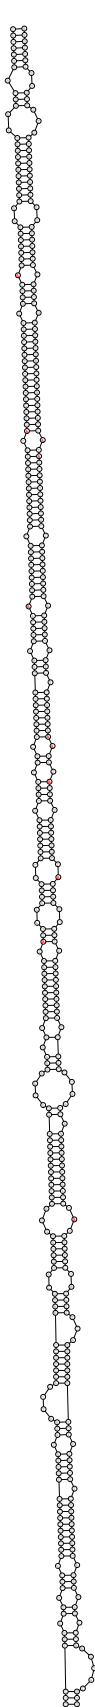

**SHAPE >= 0.85**

154

**0.85 > SHAPE >= 0.4**

**0.4 > SHAPE**

No Data

**ENERGY = -297.1 Chr19:9442989-94432...**

LPO part B

Strands Chr19:9444332-9444553  
and Chr19:9446286-9446496

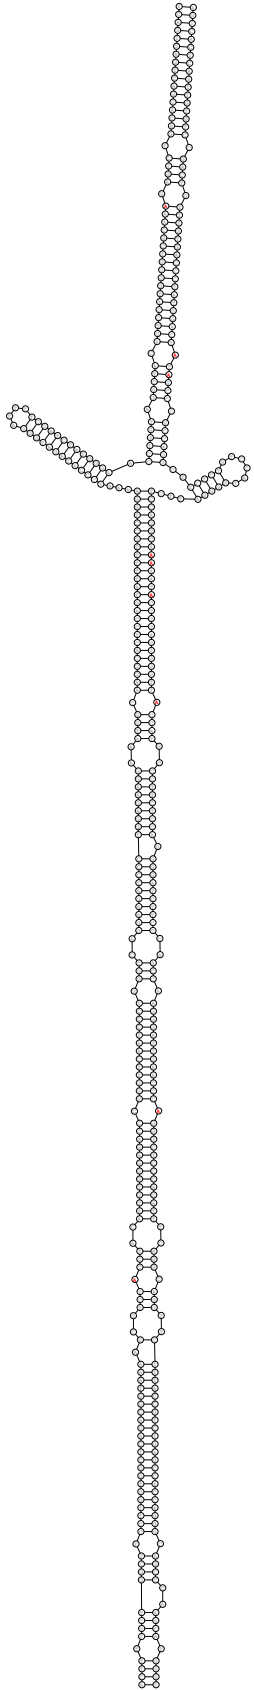

**SHAPE >= 0.85**

155

**0.85 > SHAPE >= 0.4**

**0.4 > SHAPE**

No Data

**ENERGY = -330.7 Chr19:9444332-94445...**

# LPO part C

Strands Chr19:9446280-9446456  
and Chr19:9446519-9446699

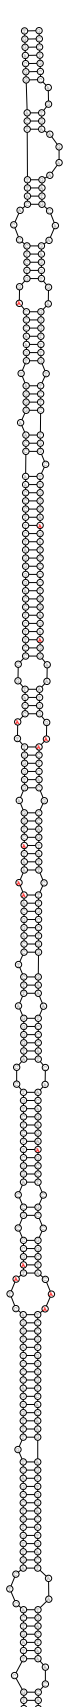

**SHAPE >= 0.85**

156

**0.85 > SHAPE >= 0.4**

**0.4 > SHAPE**

No Data

**ENERGY = -232.8 Chr19:9446280-94464...**

# LRRFIP1

Strands Chr3:117862976-117863051  
and Chr3:117863814-117863890

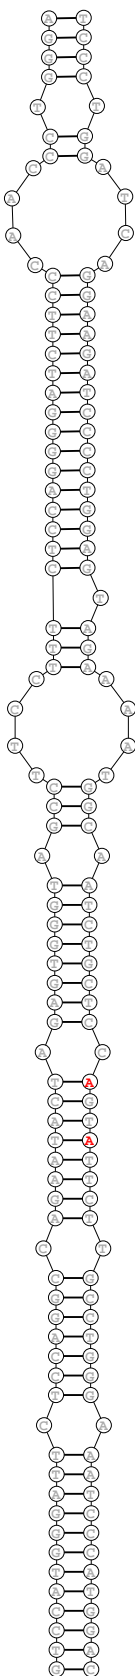

**SHAPE >= 0.85**

157

**0.85 > SHAPE >= 0.4**

**0.4 > SHAPE**

No Data

**ENERGY = -104.5 Chr3:117862976-1178...**

# LTBR part A

Strands Chr5:104350935-104351104  
and Chr5:104351945-104352109

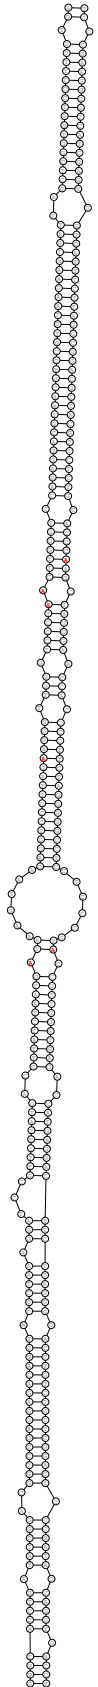

**SHAPE >= 0.85**

158

**0.85 > SHAPE >= 0.4**

**0.4 > SHAPE**

No Data

**ENERGY = -239.6 Chr5:104350935-1043...**

LTBR part B

Strands Chr5:104351159-104351328  
and Chr5:104351945-104352109

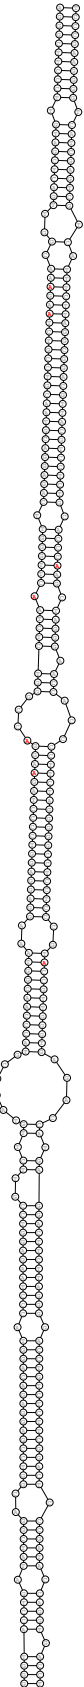

**SHAPE >= 0.85**

159

**0.85 > SHAPE >= 0.4**

**0.4 > SHAPE**

No Data

**ENERGY = -256.2 Chr5:104351159-1043...**

# LTF part A

Strands Chr22:53539208-53539329  
and Chr22:53539803-53539935

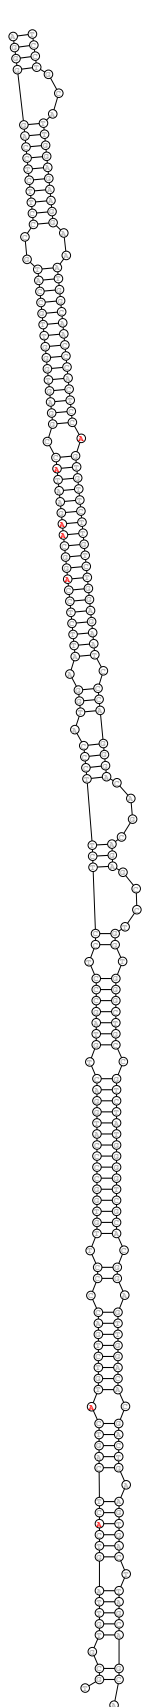

**SHAPE  $\geq 0.85$**

160

**0.85 > SHAPE  $\geq 0.4$**

**0.4 > SHAPE**

No Data

**ENERGY = -180.7 Chr22:53539208-5353...**



# LTF part B

Strands Chr22:53539208-53539369  
and Chr22:53540467-53540637

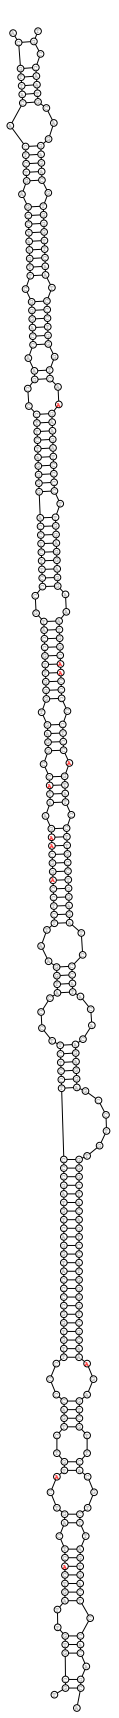

**SHAPE >= 0.85**

161

**0.85 > SHAPE >= 0.4**

**0.4 > SHAPE**

No Data

**ENERGY = -214.6 Chr22:53539208-5353...**

LTF part C

Strands Chr22:53546815-53547081  
and Chr22:53547839-53548104

**SHAPE >= 0.85**

162

**0.85 > SHAPE >= 0.4**

**0.4 > SHAPE**

No Data

**ENERGY = -547.7 Chr22:53546815-5354...**

# MACROD1 part A

Strands Chr29:42893472-42893545  
and Chr29:42893873-42893944

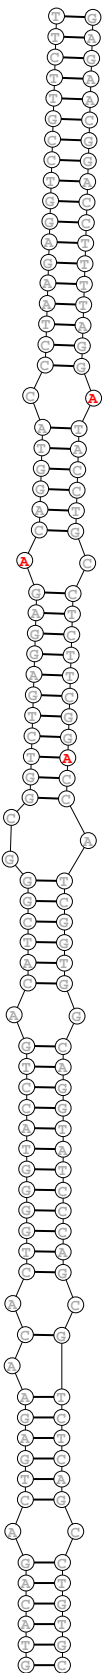

**SHAPE >= 0.85**

163

**0.85 > SHAPE >= 0.4**

**0.4 > SHAPE**

No Data

**ENERGY = -110.7 Chr29:42893472-4289...**

# MACROD1 part B

Strands Chr29:42893624-42893710  
and Chr29:42893780-42893867

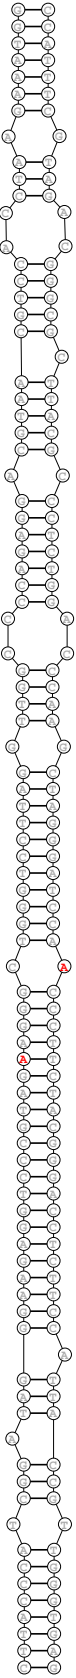

**SHAPE >= 0.85**

164

**0.85 > SHAPE >= 0.4**

**0.4 > SHAPE**

No Data

**ENERGY = -130.2 Chr29:42893624-4289...**

# MAP2K2

Strands Chr7:21141716-21141795  
and Chr7:21142591-21142677

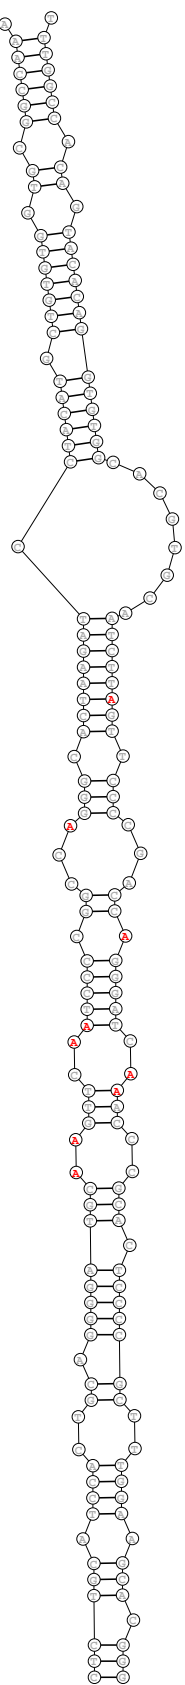

**SHAPE  $\geq 0.85$**

165

**0.85 > SHAPE  $\geq 0.4$**

**0.4 > SHAPE**

No Data

**ENERGY = -82.9 Chr7:21141716-211417...**

# MARC1 part A

Strands Chr16:24990488-24990697  
and Chr16:24991201-24991420

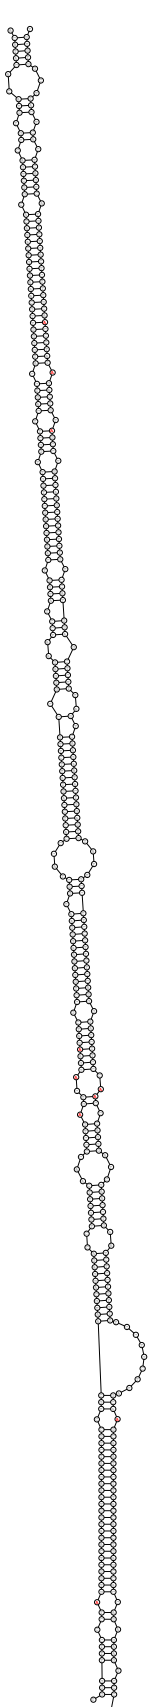

**SHAPE >= 0.85**

166

**0.85 > SHAPE >= 0.4**

**0.4 > SHAPE**

No Data

**ENERGY = -297.8 Chr16:24990488-2499...**

MARC1 part B

Strands Chr16:24990382-24990682  
and Chr16:24991975-24992275

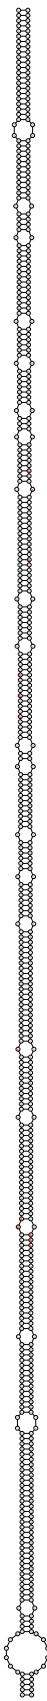

**SHAPE >= 0.85**

167

**0.85 > SHAPE >= 0.4**

**0.4 > SHAPE**

No Data

**ENERGY = -514.3 Chr16:24990382-2499...**

# MARC1 part C

Strands Chr16:24991974-24992157  
and Chr16:24993688-24993880

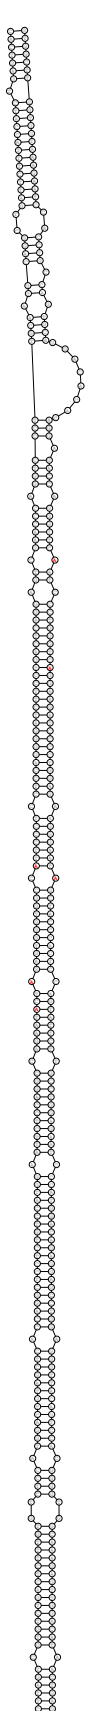

**SHAPE >= 0.85**

168

**0.85 > SHAPE >= 0.4**

**0.4 > SHAPE**

No Data

**ENERGY = -291.3 Chr16:24991974-2499...**



# MARC1 part D

Strands Chr16:24994709-24994777  
and Chr16:24994825-24994893

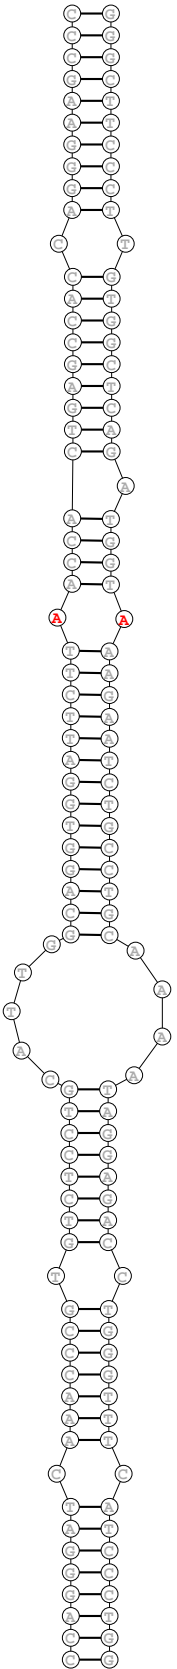

**SHAPE >= 0.85**

169

**0.85 > SHAPE >= 0.4**

**0.4 > SHAPE**

No Data

**ENERGY = -106.7 Chr16:24994709-2499...**

MARCH2 part A

Strands Chr7:18269934-18270111  
and Chr7:18271996-18272171

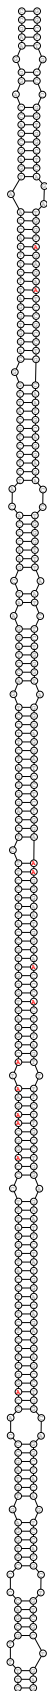

**SHAPE >= 0.85**

170

**0.85 > SHAPE >= 0.4**

**0.4 > SHAPE**

No Data

**ENERGY = -284.7 Chr7:18269934-18270...**

# MARCH2 part B

Strands Chr7:18271397-18271493  
and Chr7:18272208-18272303

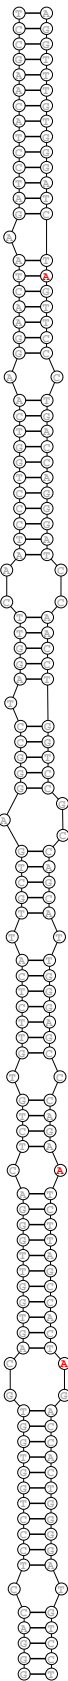

**SHAPE >= 0.85**

171

**0.85 > SHAPE >= 0.4**

**0.4 > SHAPE**

No Data

**ENERGY = -141.8 Chr7:18271397-18271...**

# MCC

Strands Chr10:930119-930297  
and Chr10:930682-930863

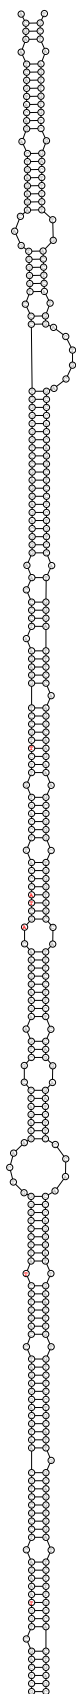

**SHAPE >= 0.85**

172

**0.85 > SHAPE >= 0.4**

**0.4 > SHAPE**

No Data

**ENERGY = -253.2 Chr10:930119-930297...**

# ME3

Strands Chr29:9165156-9165335  
and Chr29:9166169-9166357

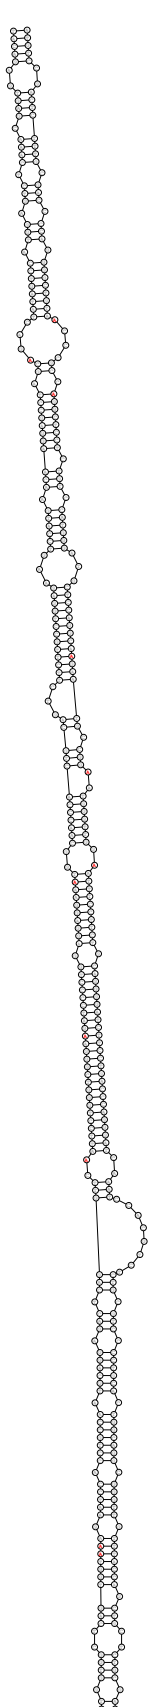

**SHAPE >= 0.85**

173

**0.85 > SHAPE >= 0.4**

**0.4 > SHAPE**

No Data

**ENERGY = -230.8 Chr29:9165156-91653...**

# METTL23 part A

Strands Chr19:55672337-55672448  
and Chr19:55673113-55673236

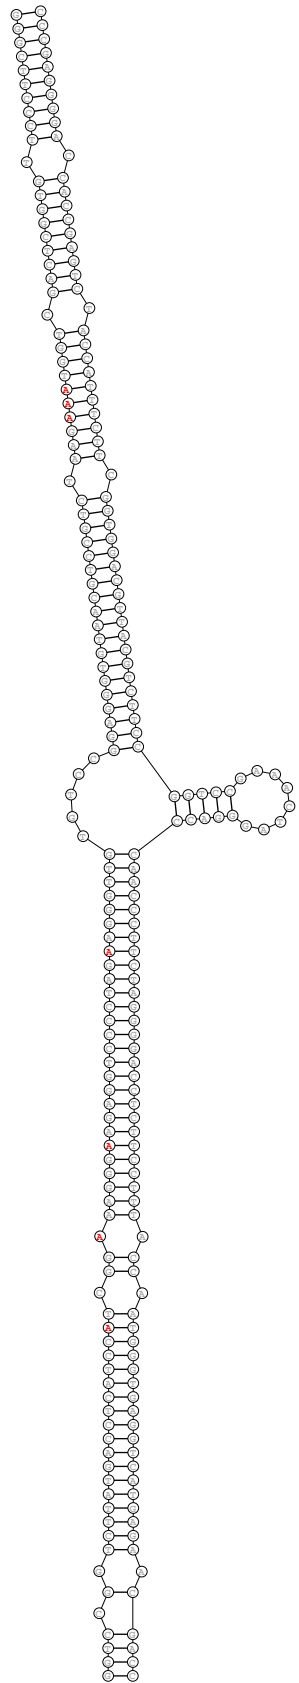

**SHAPE >= 0.85**

174

**0.85 > SHAPE >= 0.4**

**0.4 > SHAPE**

No Data

**ENERGY = -181.8 Chr19:55672337-5567...**

# METTL23 part B

Strands Chr19:55672450-55672568  
and Chr19:55673113-55673230

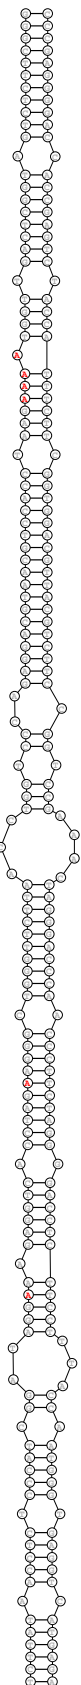

**SHAPE >= 0.85**

175

**0.85 > SHAPE >= 0.4**

**0.4 > SHAPE**

No Data

**ENERGY = -164.6 Chr19:55672450-5567...**

# MOCS1

Strands Chr23:13823944-13824136  
and Chr23:13824740-13824944

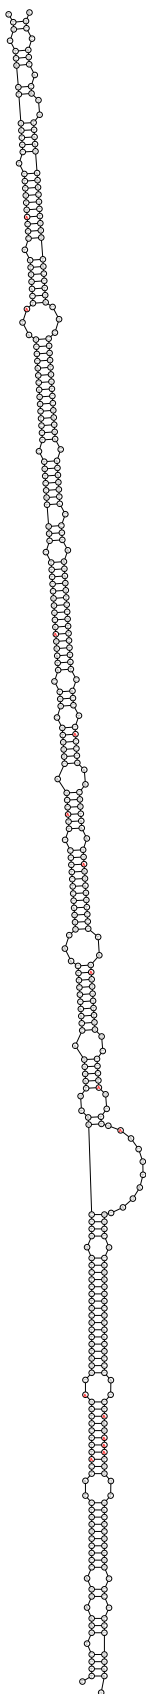

**SHAPE >= 0.85**

176

**0.85 > SHAPE >= 0.4**

**0.4 > SHAPE**

No Data

**ENERGY = -275.0 Chr23:13823944-1382...**



# MPND

Strands Chr7:20954514-20954571  
and Chr7:20955082-20955151

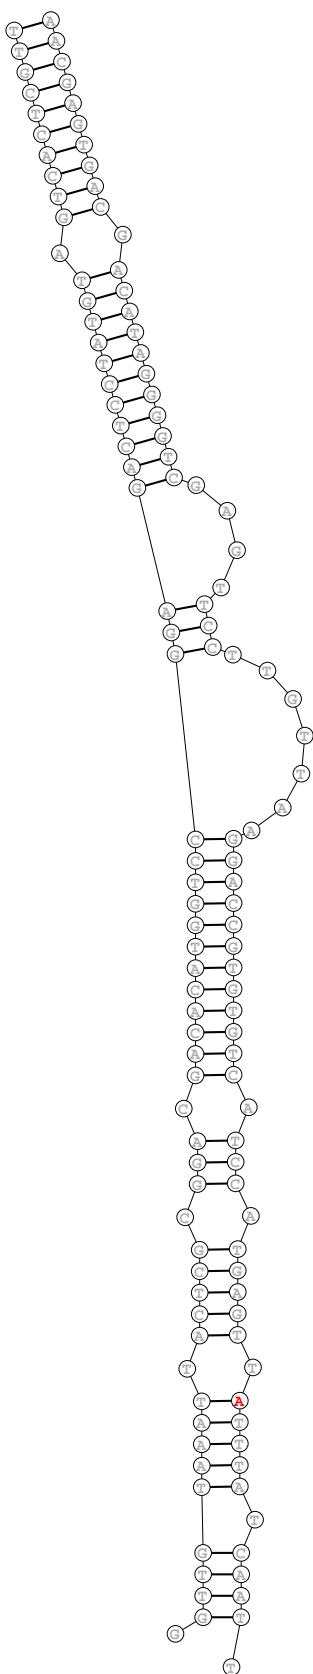

**SHAPE  $\geq$  0.85**

177

**0.85 > SHAPE  $\geq$  0.4**

**0.4 > SHAPE**

No Data

**ENERGY = -73.0 Chr7:20954514-209545...**

# MPST

Strands Chr5:75824386-75824446  
and Chr5:75824917-75824977

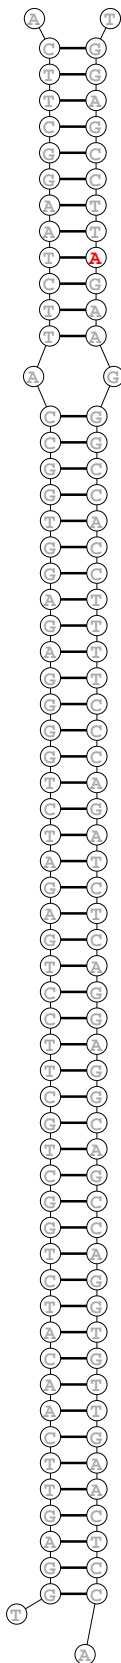

**SHAPE >= 0.85**

178

**0.85 > SHAPE >= 0.4**

**0.4 > SHAPE**

No Data

**ENERGY = -119.6 Chr5:75824386-75824...**

# MRPL51

Strands Chr5:104275489-104275689  
and Chr5:104276194-104276385

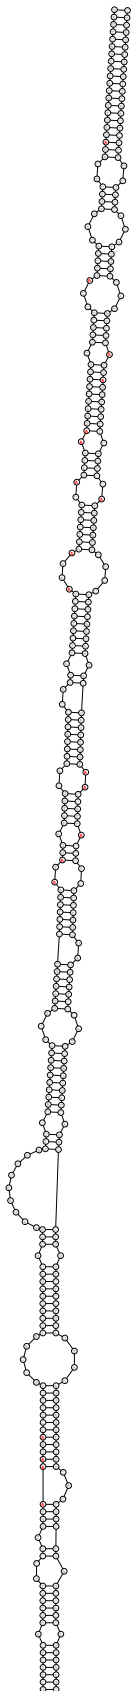

**SHAPE  $\geq 0.85$**

179

**0.85 > SHAPE  $\geq 0.4$**

**0.4 > SHAPE**

No Data

**ENERGY = -235.7 Chr5:104275489-1042...**

# MRPS18A

Strands Chr23:17160598-17160735  
and Chr23:17160832-17160966

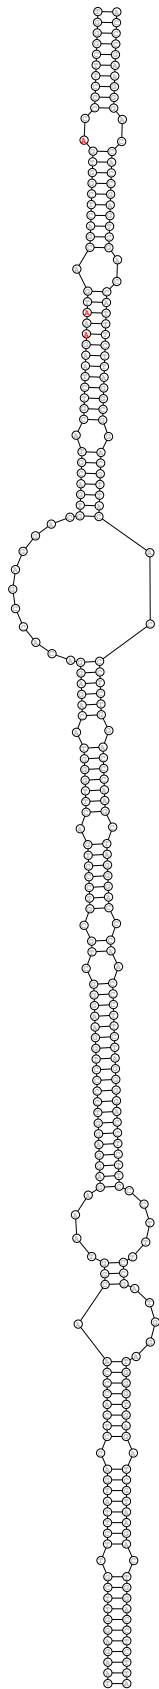

**SHAPE >= 0.85**

180

**0.85 > SHAPE >= 0.4**

**0.4 > SHAPE**

No Data

**ENERGY = -186.7 Chr23:17160598-1716...**

# MTG1

Strands Chr26:25824130-25824239  
and Chr26:25825039-25825148

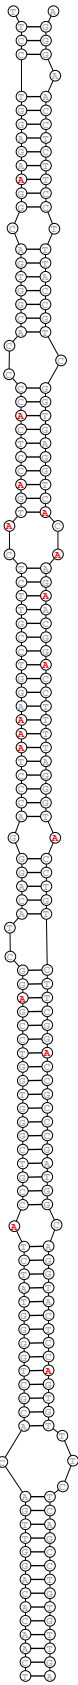

**SHAPE  $\geq$  0.85**

181

**0.85 > SHAPE  $\geq$  0.4**

**0.4 > SHAPE**

No Data

**ENERGY = -178.2 Chr26:25824130-2582...**

# MTSS1 part A

Strands Chr14:17121347-17121482  
and Chr14:17122640-17122779

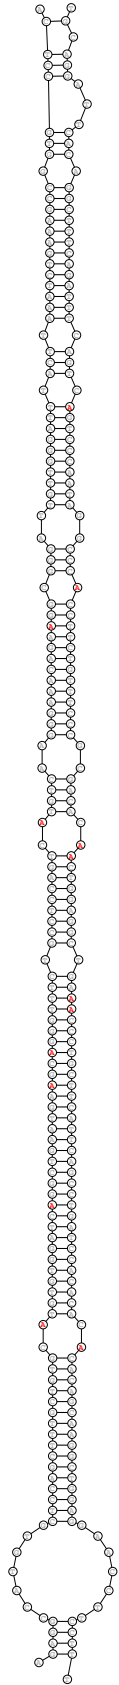

**SHAPE  $\geq$  0.85**

182

**0.85 > SHAPE  $\geq$  0.4**

**0.4 > SHAPE**

No Data

**ENERGY = -202.3 Chr14:17121347-1712...**

# MTSS1 part B

Strands Chr14:17127440-17127568  
and Chr14:17127745-17127893

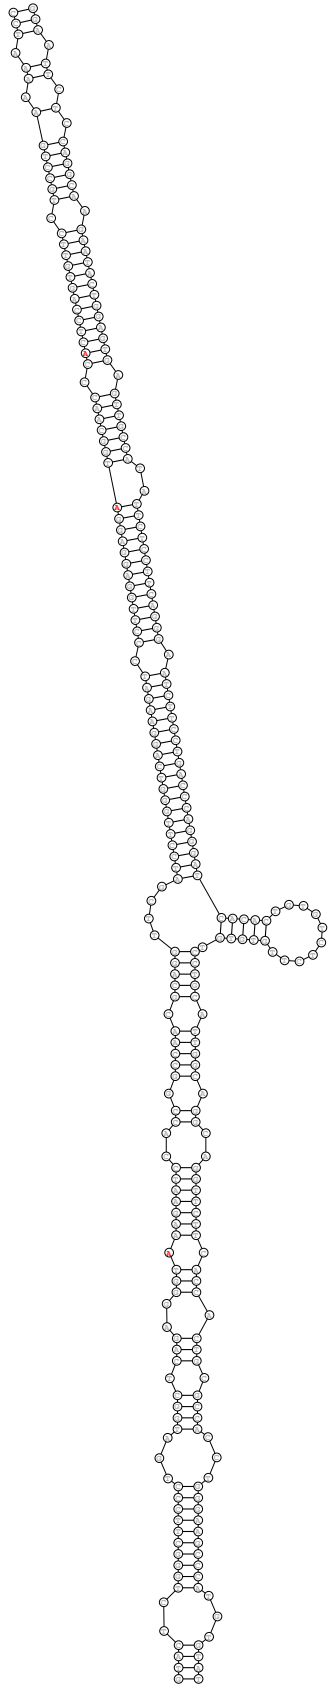

**SHAPE  $\geq$  0.85**

183

**0.85 > SHAPE  $\geq$  0.4**

**0.4 > SHAPE**

No Data

**ENERGY = -174.9 Chr14:17127440-1712...**

# NDUFA6

Strands Chr5:113571696-113571810  
and Chr5:113572733-113572849

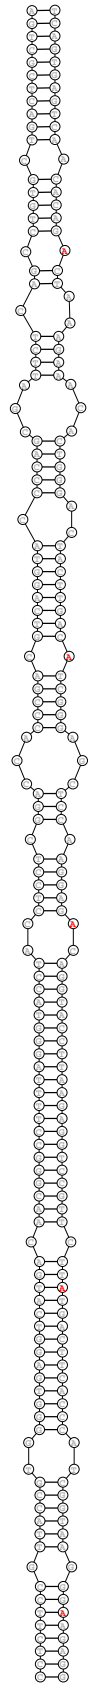

**SHAPE  $\geq$  0.85**

184

**0.85 > SHAPE  $\geq$  0.4**

**0.4 > SHAPE**

No Data

**ENERGY = -156.5 Chr5:113571696-1135...**



# NHLRC3

Strands Chr12:23232517-23232605  
and Chr12:23233943-23234030

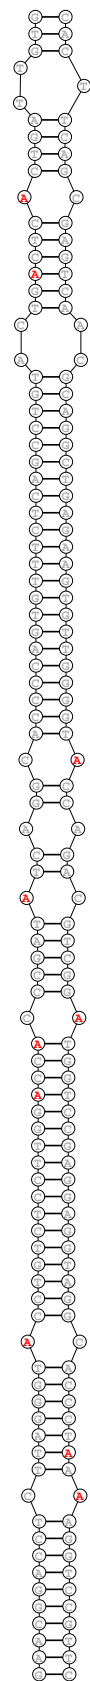

**SHAPE  $\geq$  0.85**

185

**0.85 > SHAPE  $\geq$  0.4**

**0.4 > SHAPE**

No Data

**ENERGY = -125.2 Chr12:23232517-2323...**

# NMI

Strands Chr2:44940775-44940837  
and Chr2:44948925-44948987

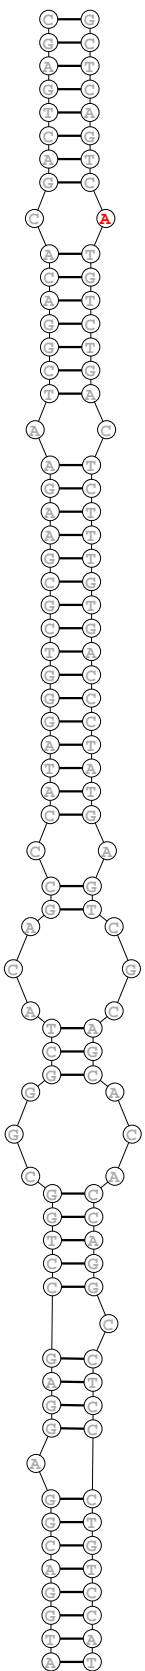

**SHAPE >= 0.85**

186

**0.85 > SHAPE >= 0.4**

**0.4 > SHAPE**

No Data

**ENERGY = -88.1 Chr2:44940775-449408...**

ORC4

Strands Chr2:48343657-48343700  
and Chr2:48343702-48343729

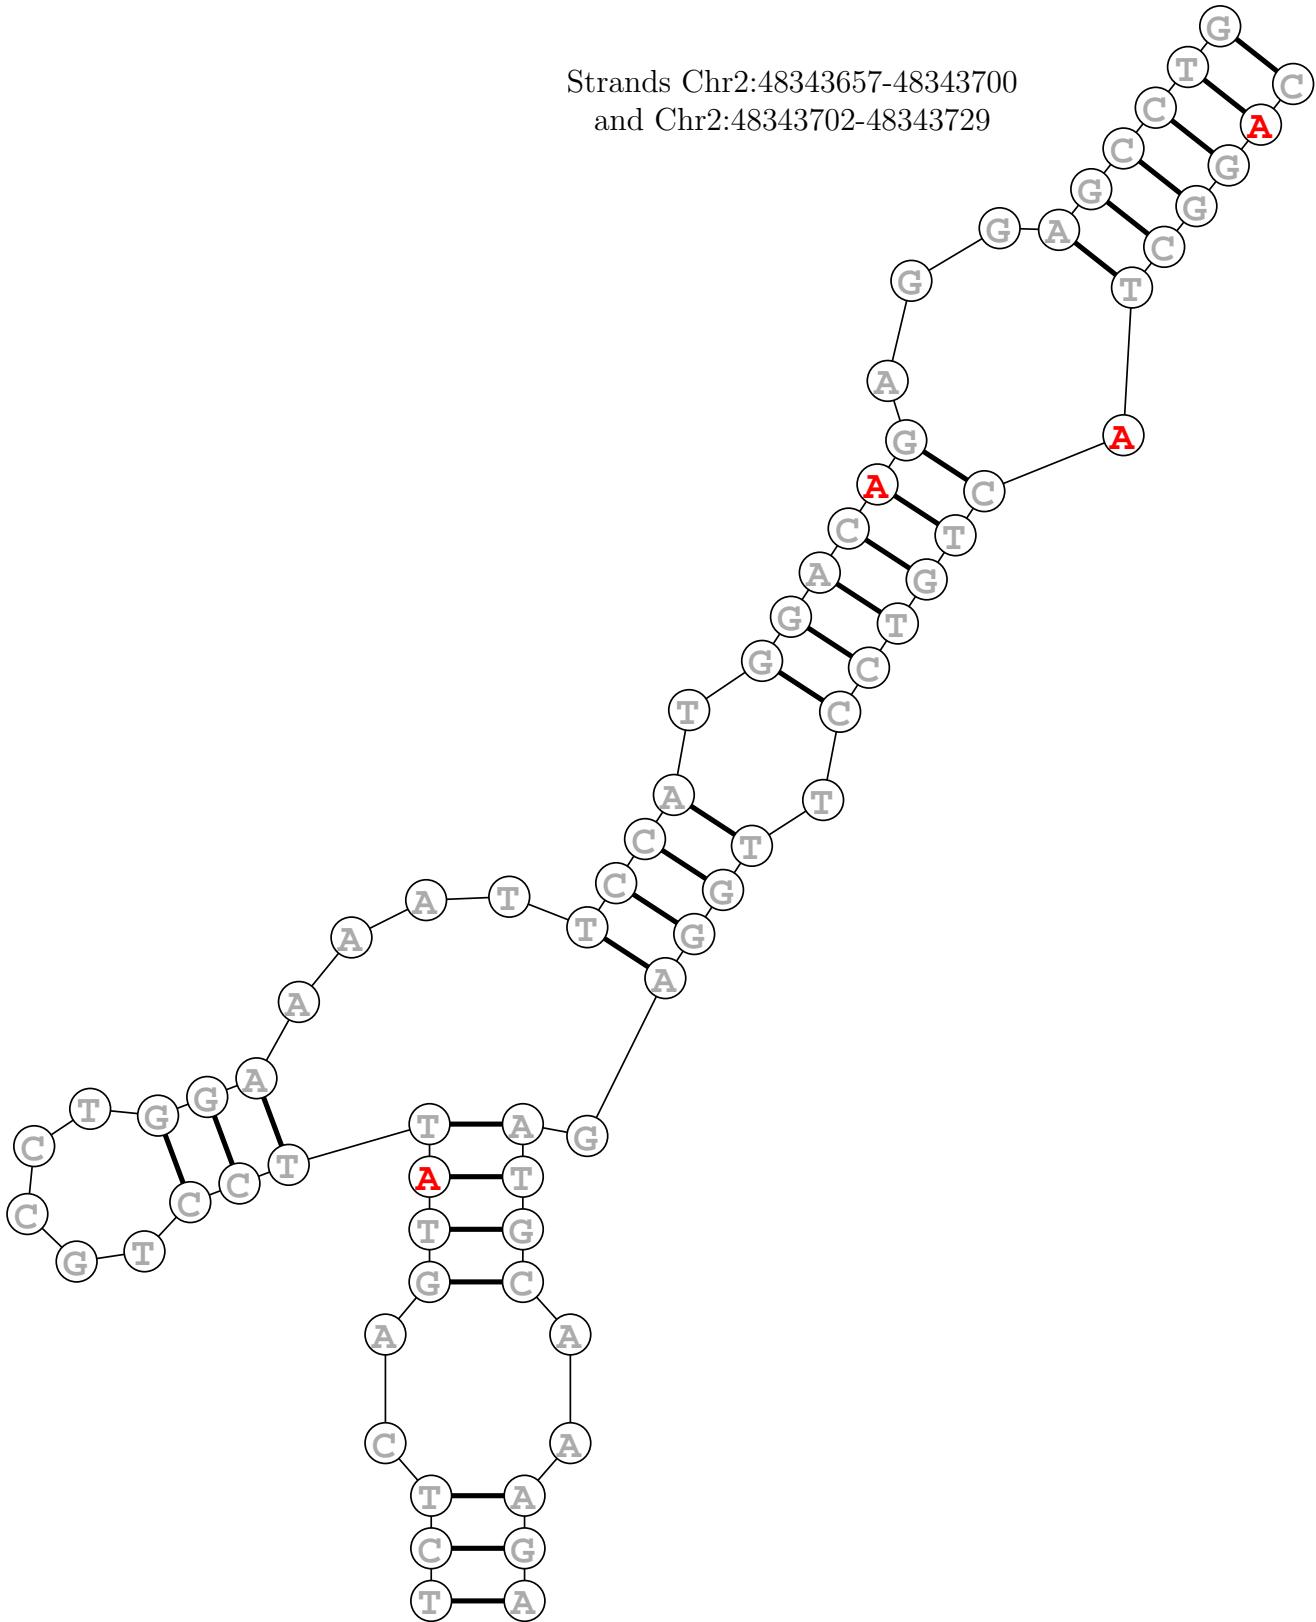

**SHAPE >= 0.85**

187

**0.85 > SHAPE >= 0.4**

**0.4 > SHAPE**

No Data

**ENERGY = -29.5 Chr2:48343657-483437...**

# OSTC

Strands Chr6:17796764-17796867  
and Chr6:17797008-17797113

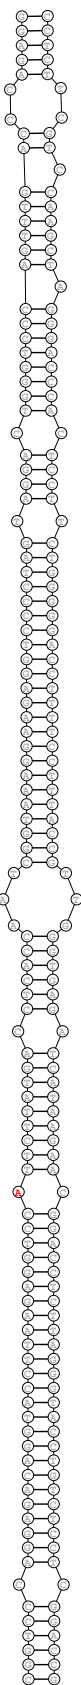

**SHAPE >= 0.85**

188

**0.85 > SHAPE >= 0.4**

**0.4 > SHAPE**

No Data

**ENERGY = -171.9 Chr6:17796764-17796...**

# PAIP2

Strands Chr7:52263913-52264023  
and Chr7:52265039-52265149

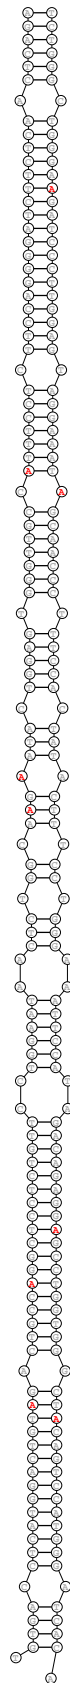

**SHAPE  $\geq$  0.85**

189

**0.85 > SHAPE  $\geq$  0.4**

**0.4 > SHAPE**

No Data

**ENERGY = -153.7 Chr7:52263913-52264...**

# PANK2 part A

Strands Chr13:51741616-51741768  
and Chr13:51741838-51741990

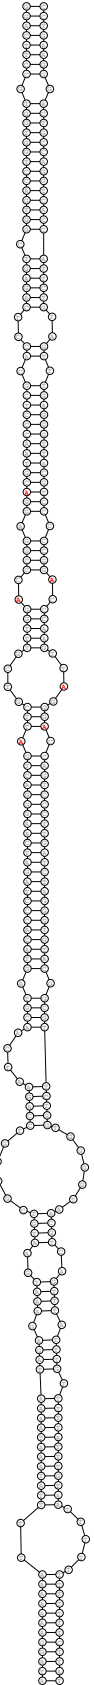

**SHAPE  $\geq$  0.85**

190

**0.85 > SHAPE  $\geq$  0.4**

**0.4 > SHAPE**

No Data

**ENERGY = -176.8 Chr13:51741616-5174...**

# PANK2 part B

Strands Chr13:51750005-51750195  
and Chr13:51751019-51751209

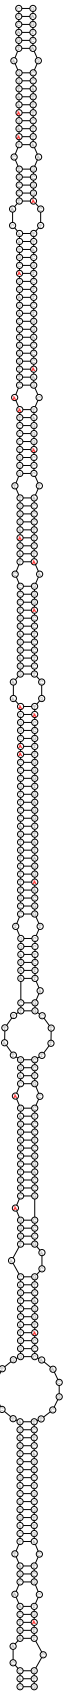

**SHAPE >= 0.85**

191

**0.85 > SHAPE >= 0.4**

**0.4 > SHAPE**

No Data

**ENERGY = -286.6 Chr13:51750005-5175...**

# PANK2 part C

Strands Chr13:51750291-51750375  
and Chr13:51751124-51751212

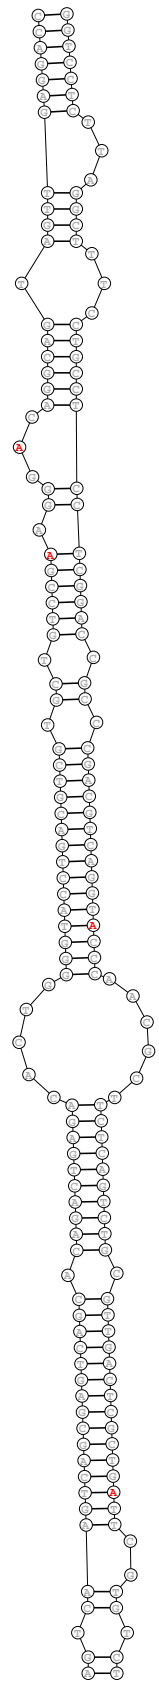

**SHAPE  $\geq$  0.85**

192

**0.85 > SHAPE  $\geq$  0.4**

**0.4 > SHAPE**

No Data

**ENERGY = -116.5 Chr13:51750291-5175...**



# PAOX

Strands Chr26:25830243-25830306  
and Chr26:25830970-25831033

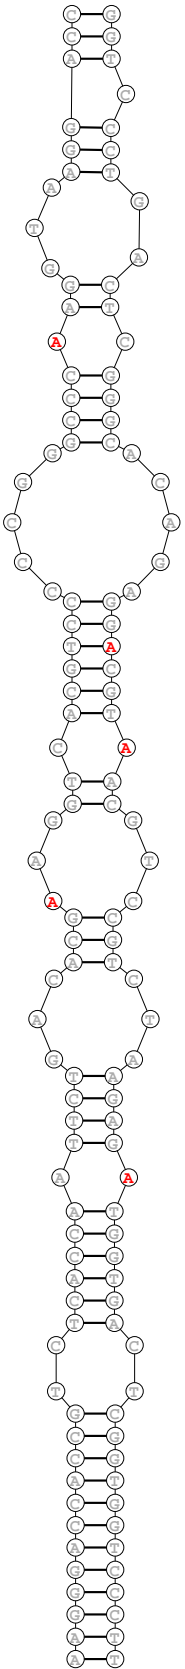

**SHAPE >= 0.85**

193

**0.85 > SHAPE >= 0.4**

**0.4 > SHAPE**

No Data

**ENERGY = -70.5 Chr26:25830243-25830...**

# PCSK7

Strands Chr15:28329722-28329791  
and Chr15:28330294-28330359

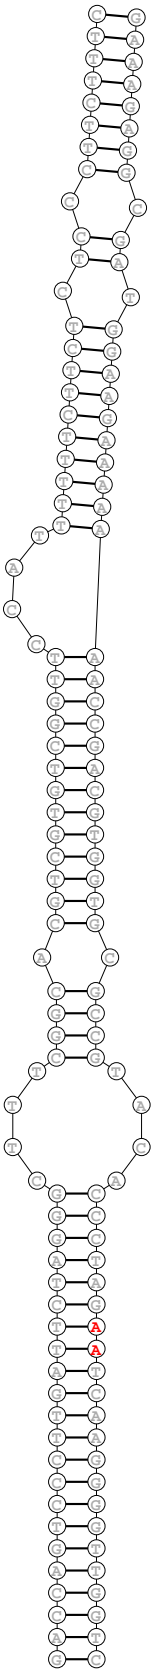

**SHAPE  $\geq$  0.85**

194

**0.85 > SHAPE  $\geq$  0.4**

**0.4 > SHAPE**

No Data

**ENERGY = -81.9 Chr15:28329722-28329...**

# PDCD4

Strands Chr26:31726876-31726960  
and Chr26:31728252-31728338

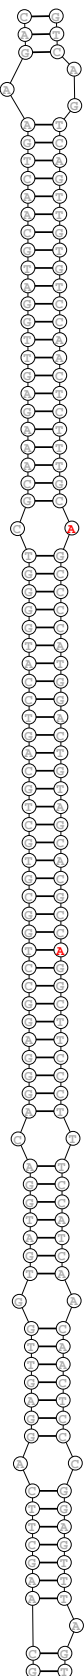

**SHAPE >= 0.85**

195

**0.85 > SHAPE >= 0.4**

**0.4 > SHAPE**

No Data

**ENERGY = -145.3 Chr26:31726876-3172...**



PEX11G part A

Strands Chr7:17574059-17574287  
and Chr7:17575082-17575302

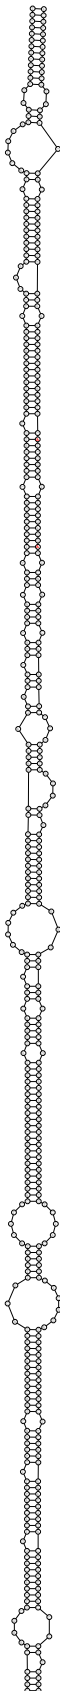

**SHAPE >= 0.85**

197

**0.85 > SHAPE >= 0.4**

**0.4 > SHAPE**

No Data

**ENERGY = -284.9 Chr7:17574059-17574...**

PEX11G part B

Strands Chr7:17576651-17576835  
and Chr7:17577728-17577902

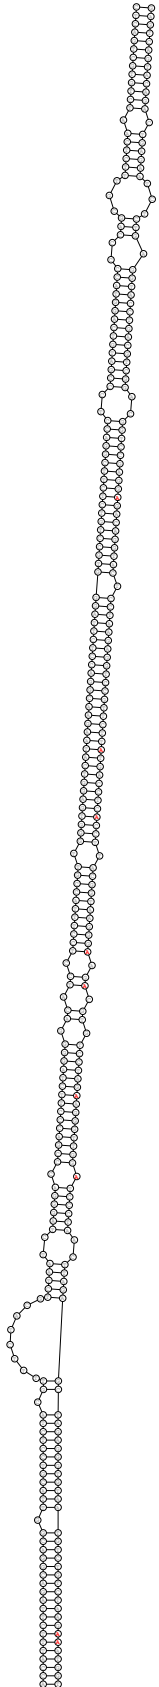

**SHAPE >= 0.85**

198

**0.85 > SHAPE >= 0.4**

**0.4 > SHAPE**

No Data

**ENERGY = -274.5 Chr7:17576651-17576...**

# PEX6

Strands Chr23:16581574-16581714  
and Chr23:16583161-16583301

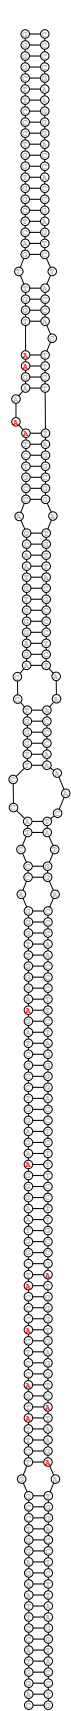

**SHAPE >= 0.85**

199

**0.85 > SHAPE >= 0.4**

**0.4 > SHAPE**

No Data

**ENERGY = -247.6 Chr23:16581574-1658...**

# PFKFB2

Strands Chr16:4746998-4747203  
and Chr16:4747307-4747497

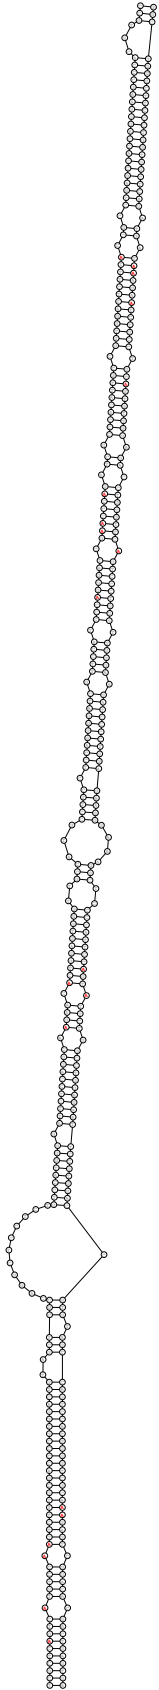

**SHAPE >= 0.85**

200

**0.85 > SHAPE >= 0.4**

**0.4 > SHAPE**

No Data

**ENERGY = -310.1 Chr16:4746998-47472...**



# PGPEP1

Strands Chr7:4764446-4764577  
and Chr7:4765247-4765375

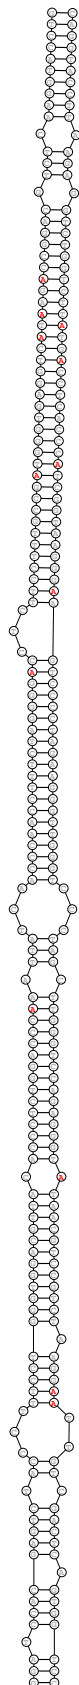

**SHAPE  $\geq$  0.85**

201

**0.85 > SHAPE  $\geq$  0.4**

**0.4 > SHAPE**

No Data

**ENERGY = -202.6 Chr7:4764446-476457...**



PHF11 part B

Strands Chr12:19179849-19179961  
and Chr12:19180252-19180363

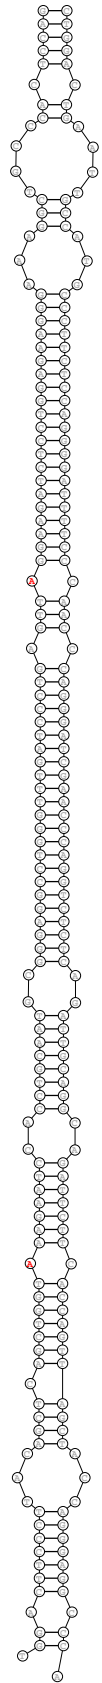

**SHAPE >= 0.85**

203

**0.85 > SHAPE >= 0.4**

**0.4 > SHAPE**

No Data

**ENERGY = -156.9 Chr12:19179849-1917...**

# PIGS

Strands Chr19:20575187-20575272  
and Chr19:20576148-20576233

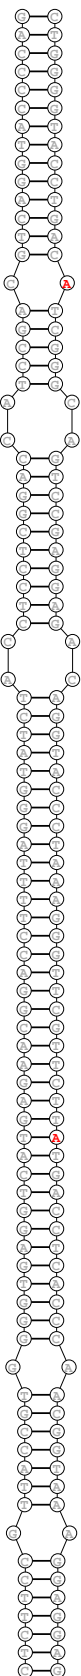

**SHAPE  $\geq$  0.85**

204

**0.85 > SHAPE  $\geq$  0.4**

**0.4 > SHAPE**

No Data

**ENERGY = -147.7 Chr19:20575187-2057...**

# PIGZ

Strands Chr1:72028465-72028535  
and Chr1:72029241-72029312

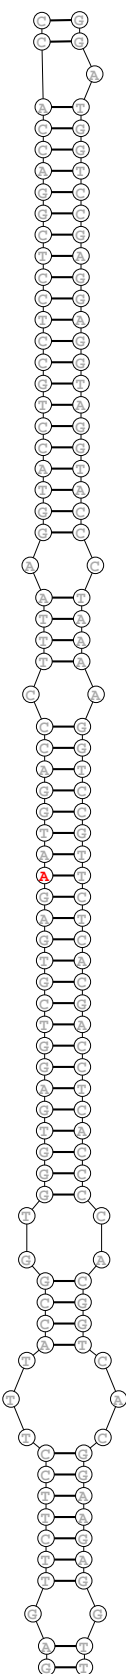

**SHAPE >= 0.85**

205

**0.85 > SHAPE >= 0.4**

**0.4 > SHAPE**

No Data

**ENERGY = -117.7 Chr1:72028465-72028...**

# PLIN1

Strands Chr21:21503244-21503408  
and Chr21:21503677-21503860

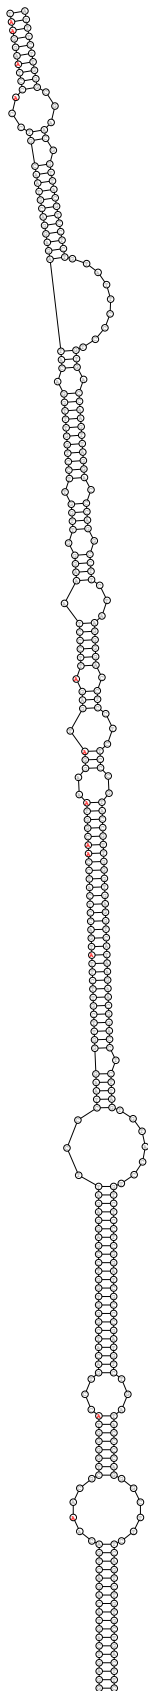

**SHAPE >= 0.85**

206

**0.85 > SHAPE >= 0.4**

**0.4 > SHAPE**

No Data

**ENERGY = -226.1 Chr21:21503244-2150...**

# PLIN3 part A

Strands Chr7:20520829-20520930  
and Chr7:20522101-20522189

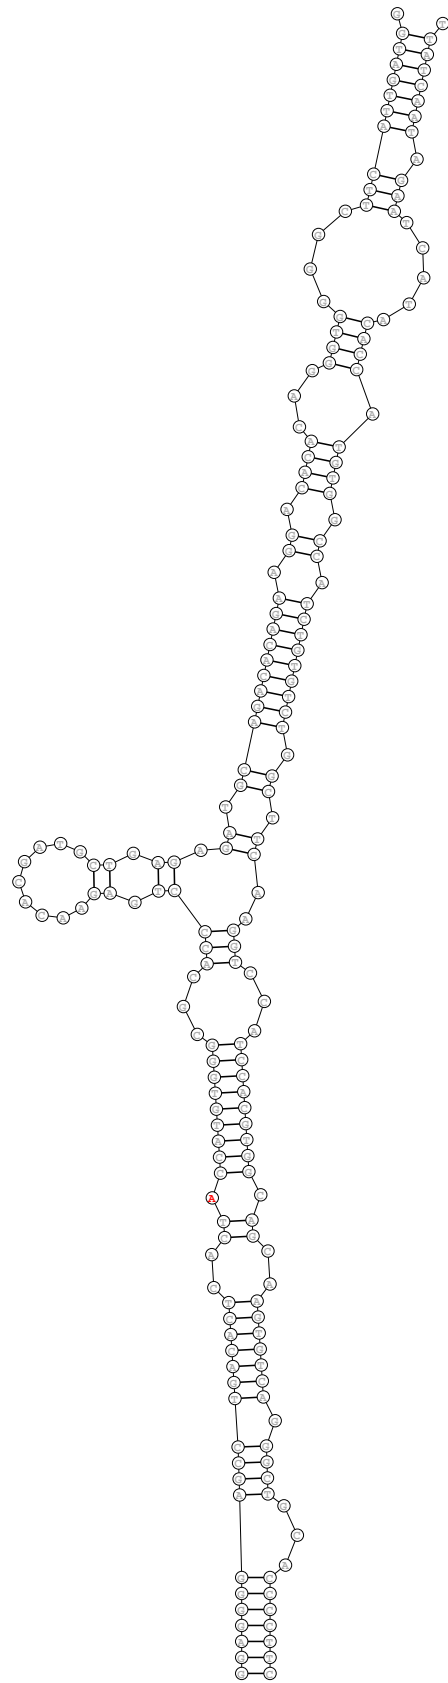

**SHAPE  $\geq$  0.85**

207

**0.85 > SHAPE  $\geq$  0.4**

**0.4 > SHAPE**

No Data

**ENERGY = -85.9 Chr7:20520829-205209...**

# PLIN3 part B

Strands Chr7:20520071-20520193  
and Chr7:20523275-20523398

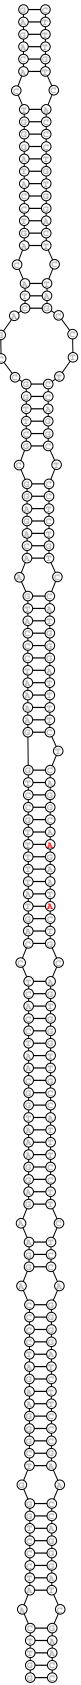

**SHAPE >= 0.85**

208

**0.85 > SHAPE >= 0.4**

**0.4 > SHAPE**

No Data

**ENERGY = -191.6 Chr7:20520071-20520...**



# PMPCB part A

Strands Chr4:44780819-44780921  
and Chr4:44782250-44782352

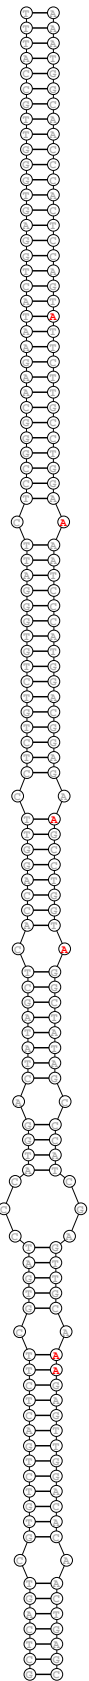

**SHAPE >= 0.85**

209

**0.85 > SHAPE >= 0.4**

**0.4 > SHAPE**

No Data

**ENERGY = -158.6 Chr4:44780819-44780...**

# PMPCB part B

Strands Chr4:44781847-44781904  
and Chr4:44782251-44782303

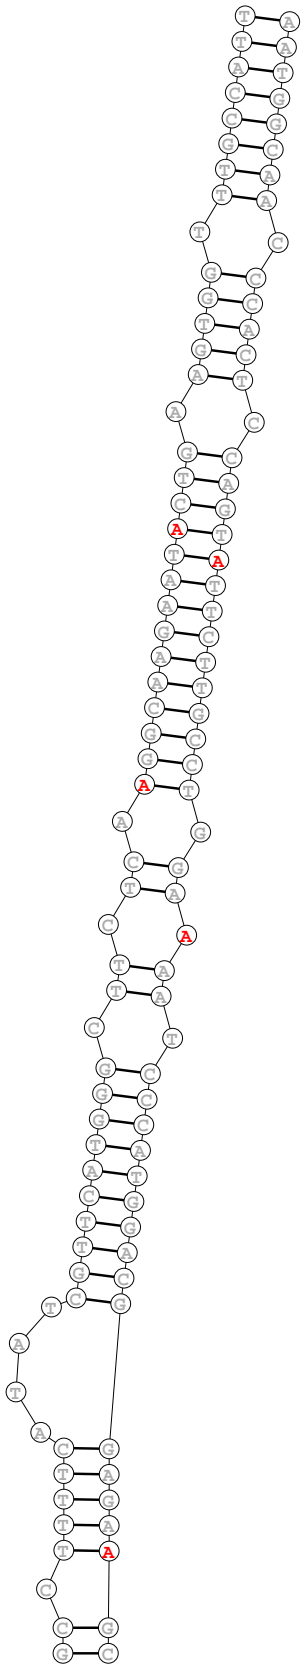

**SHAPE  $\geq$  0.85**

210

**0.85 > SHAPE  $\geq$  0.4**

**0.4 > SHAPE**

**No Data**

**ENERGY = -65.4 Chr4:44781847-447819...**

# PNPLA3 part A

Strands Chr5:114968741-114968867  
and Chr5:114969615-114969738

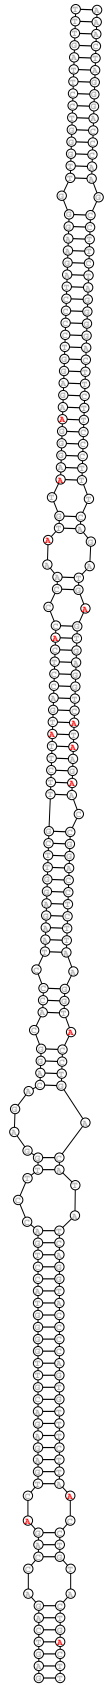

**SHAPE  $\geq$  0.85**

211

**0.85 > SHAPE  $\geq$  0.4**

**0.4 > SHAPE**

No Data

**ENERGY = -178.5 Chr5:114968741-1149...**

# PNPLA3 part B

Strands Chr5:114969593-114969738  
and Chr5:114970442-114970600

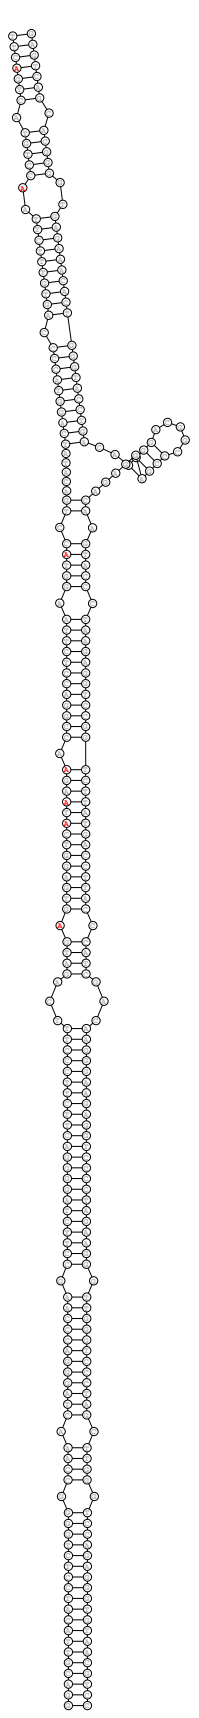

**SHAPE >= 0.85**

212

**0.85 > SHAPE >= 0.4**

**0.4 > SHAPE**

No Data

**ENERGY = -234.5 Chr5:114969593-1149...**

# PODNL1

Strands Chr7:12870320-12870354  
and Chr7:12870359-12870394

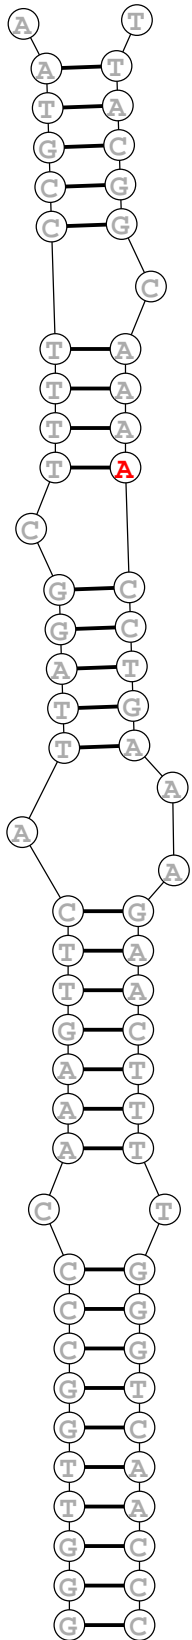

**SHAPE >= 0.85**

213

**0.85 > SHAPE >= 0.4**

**0.4 > SHAPE**

No Data

**ENERGY = -40.6 Chr7:12870320-128703...**



# PPAT

Strands Chr6:73456717-73456796  
and Chr6:73457087-73457166

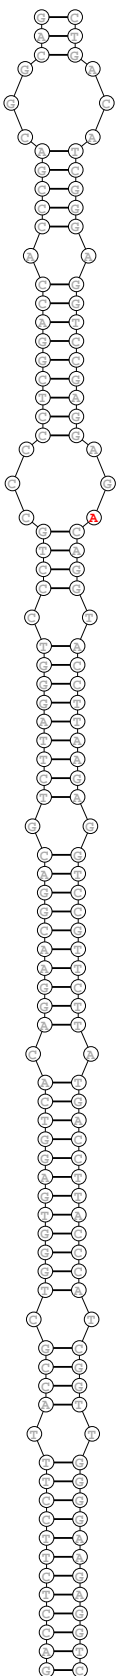

**SHAPE  $\geq 0.85$**

215

**0.85 > SHAPE  $\geq 0.4$**

**0.4 > SHAPE**

No Data

**ENERGY = -121.1 Chr6:73456717-73456...**

# PPT2

Strands Chr23:27029439-27029549  
and Chr23:27029762-27029870

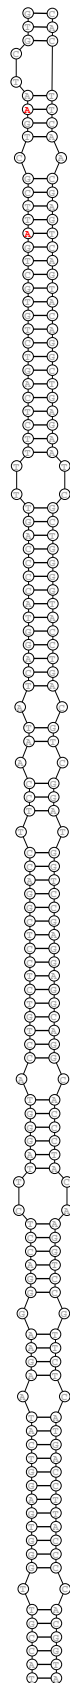

**SHAPE >= 0.85**

216

**0.85 > SHAPE >= 0.4**

**0.4 > SHAPE**

No Data

**ENERGY = -172.6 Chr23:27029439-2702...**



# PSAT1

Strands Chr8:54529216-54529243  
and Chr8:54529246-54529273

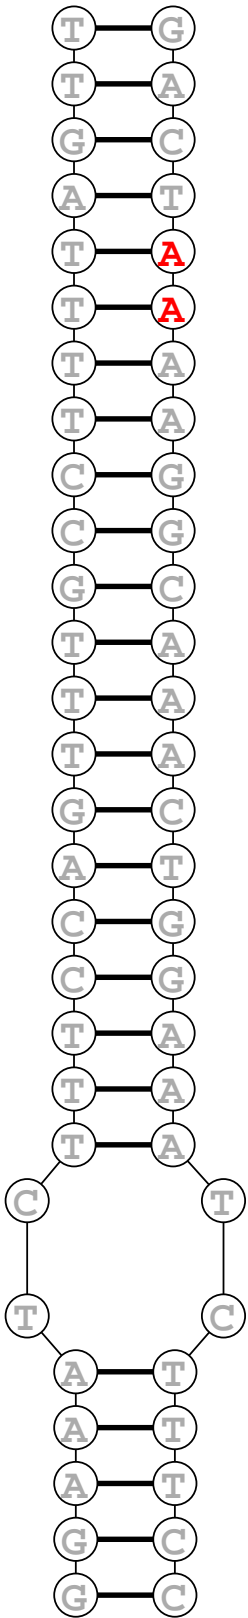

**SHAPE >= 0.85**

217

**0.85 > SHAPE >= 0.4**

**0.4 > SHAPE**

No Data

**ENERGY = -36.7 Chr8:54529216-545292...**

# PSPC1 part A

Strands Chr12:36575192-36575285  
and Chr12:36576164-36576257

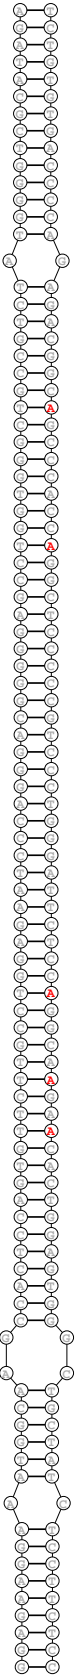

**SHAPE >= 0.85**

218

**0.85 > SHAPE >= 0.4**

**0.4 > SHAPE**

No Data

**ENERGY = -200.0 Chr12:36575192-3657...**

# PSPC1 part B

Strands Chr12:36575202-36575280  
and Chr12:36576313-36576391

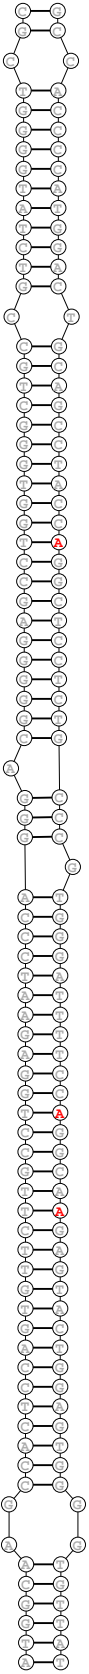

**SHAPE  $\geq$  0.85**

219

**0.85 > SHAPE  $\geq$  0.4**

**0.4 > SHAPE**

No Data

**ENERGY = -140.5 Chr12:36575202-3657...**

PSPC1 part C

Strands Chr12:36576380-36576416  
and Chr12:36576445-36576477

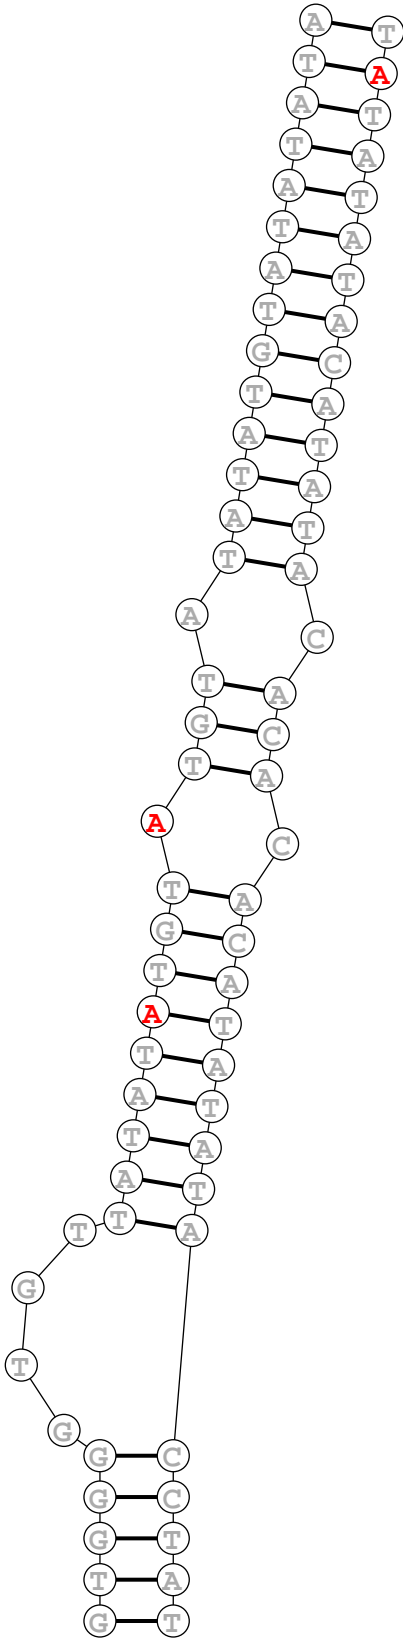

**SHAPE >= 0.85**

220

**0.85 > SHAPE >= 0.4**

**0.4 > SHAPE**

No Data

**ENERGY = -28.2 Chr12:36576380-36576...**



# PTK2B

Strands Chr8:75838533-75838769  
and Chr8:75838780-75839009

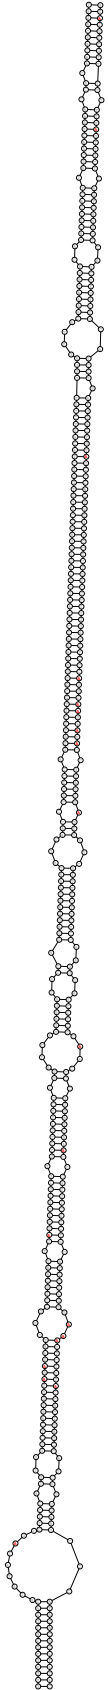

**SHAPE >= 0.85**

222

**0.85 > SHAPE >= 0.4**

**0.4 > SHAPE**

No Data

**ENERGY = -316.0 Chr8:75838533-75838...**

# RAB12

Strands Chr24:41533758-41533876  
and Chr24:41534945-41535062

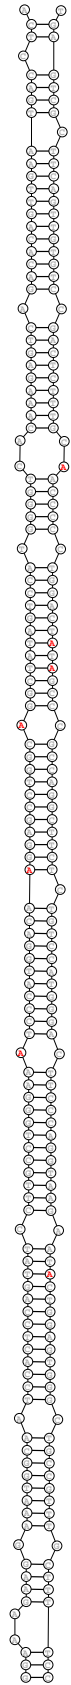

**SHAPE  $\geq$  0.85**

223

**0.85 > SHAPE  $\geq$  0.4**

**0.4 > SHAPE**

No Data

**ENERGY = -179.3 Chr24:41533758-4153...**

# RAB18 part A

Strands Chr13:37329529-37329692  
and Chr13:37330279-37330435

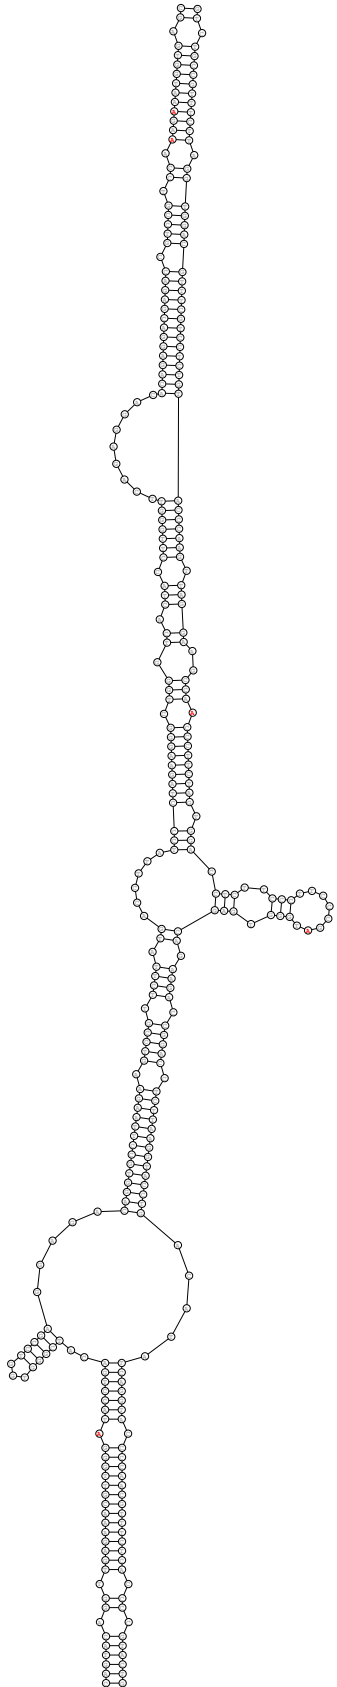

**SHAPE  $\geq 0.85$**

224

**0.85 > SHAPE  $\geq 0.4$**

**0.4 > SHAPE**

No Data

**ENERGY = -179.6 Chr13:37329529-3732...**



RAB18 part B

Strands Chr13:37329804-37329918  
and Chr13:37330285-37330397

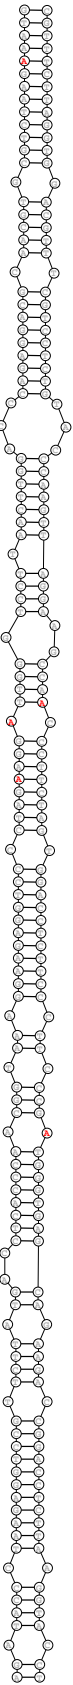

**SHAPE  $\geq$  0.85**

225

**0.85 > SHAPE  $\geq$  0.4**

**0.4 > SHAPE**

No Data

**ENERGY = -144.7 Chr13:37329804-3732...**

# RAB3IP

Strands Chr5:43897009-43897090  
and Chr5:43897424-43897503

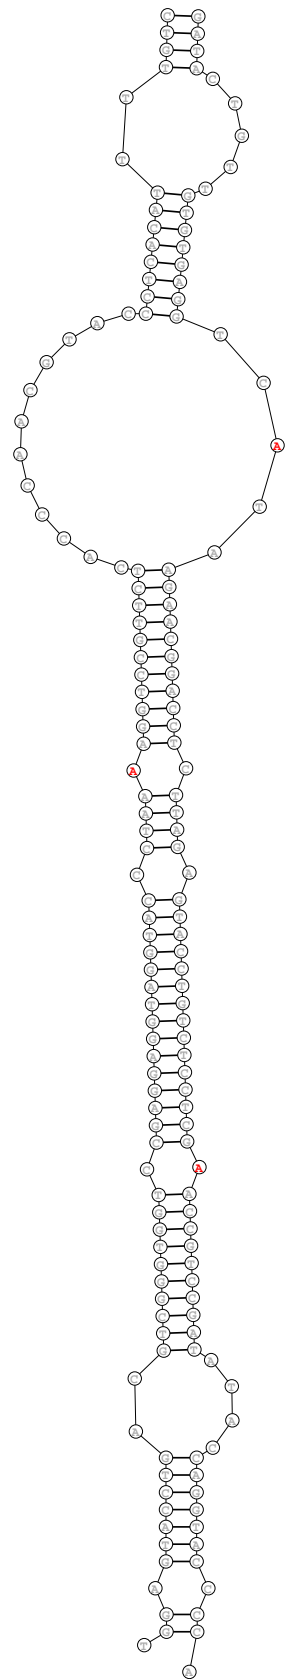

**SHAPE  $\geq$  0.85**

226

**0.85 > SHAPE  $\geq$  0.4**

**0.4 > SHAPE**

No Data

**ENERGY = -86.6 Chr5:43897009-438970...**

# RAD51D

Strands Chr19:15300628-15300725  
and Chr19:15301239-15301346

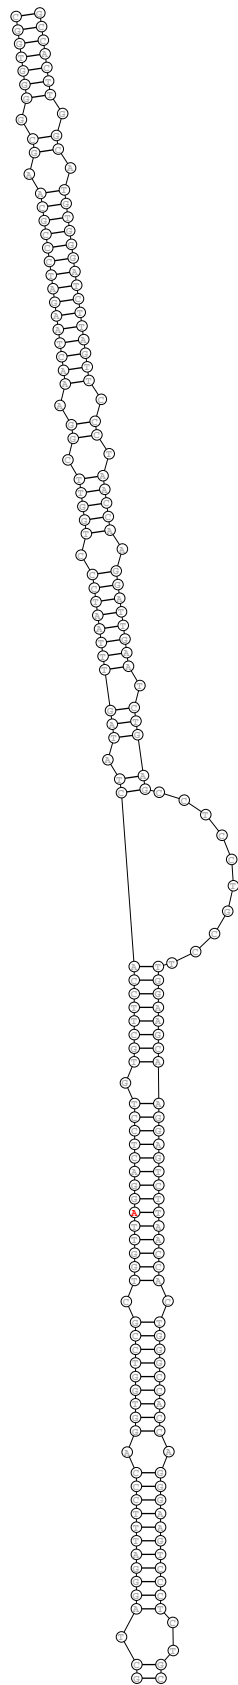

**SHAPE  $\geq$  0.85**

227

**0.85 > SHAPE  $\geq$  0.4**

**0.4 > SHAPE**

No Data

**ENERGY = -137.3 Chr19:15300628-1530...**

# RAMP3

Strands Chr4:77171367-77171462  
and Chr4:77172835-77172930

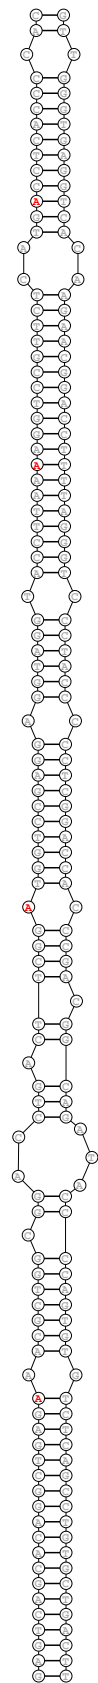

**SHAPE >= 0.85**

228

**0.85 > SHAPE >= 0.4**

**0.4 > SHAPE**

No Data

**ENERGY = -152.8 Chr4:77171367-77171...**

# RASSF4

Strands Chr28:44945642-44945747  
and Chr28:44946668-44946775

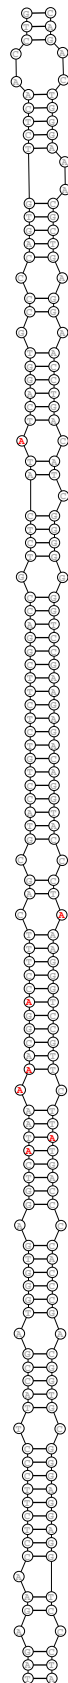

**SHAPE  $\geq$  0.85**

229

**0.85 > SHAPE  $\geq$  0.4**

**0.4 > SHAPE**

No Data

**ENERGY = -143.2 Chr28:44945642-4494...**

# RBL1

Strands Chr13:66624266-66624330  
and Chr13:66624716-66624780

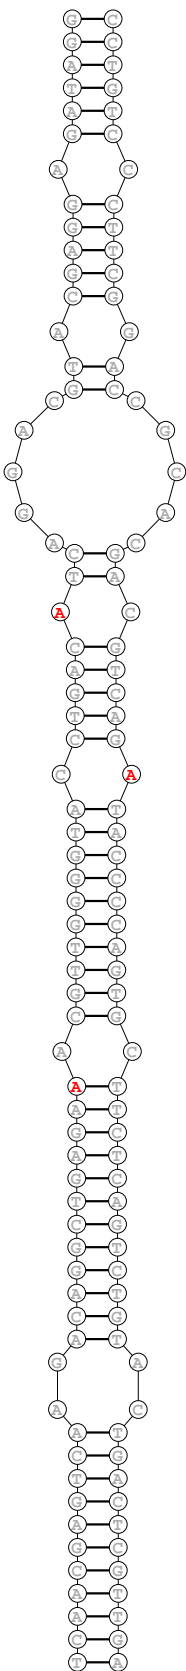

**SHAPE >= 0.85**

230

**0.85 > SHAPE >= 0.4**

**0.4 > SHAPE**

**No Data**

**ENERGY = -77.0 Chr13:66624266-66624...**



# RBM14 part B

Strands Chr29:45303477-45303528  
and Chr29:45303798-45303849

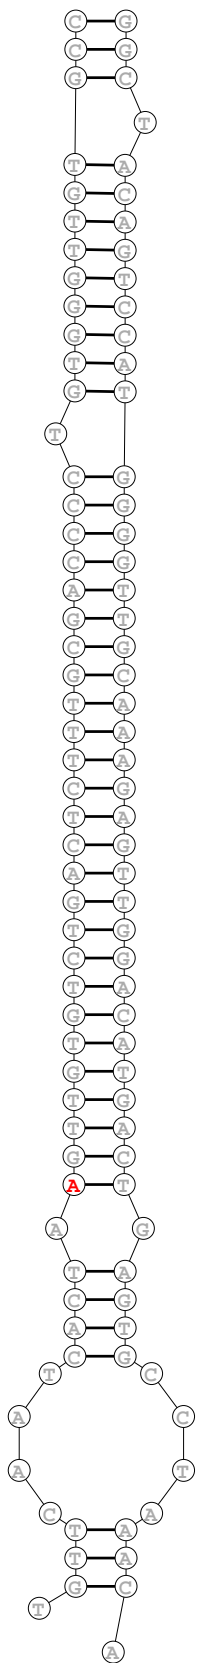

**SHAPE >= 0.85**

232

**0.85 > SHAPE >= 0.4**

**0.4 > SHAPE**

No Data

**ENERGY = -64.1 Chr29:45303477-45303...**



# RBP7

Strands Chr16:44427373-44427443  
and Chr16:44427930-44428027

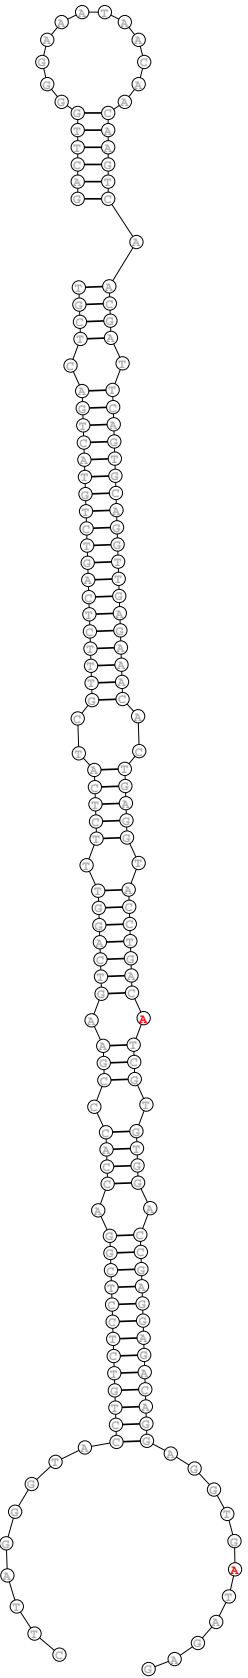

**SHAPE  $\geq$  0.85**

233

**0.85 > SHAPE  $\geq$  0.4**

**0.4 > SHAPE**

No Data

**ENERGY = -97.6 Chr16:44427373-44427...**

# RCHY1

Strands Chr6:92062308-92062389  
and Chr6:92063145-92063223

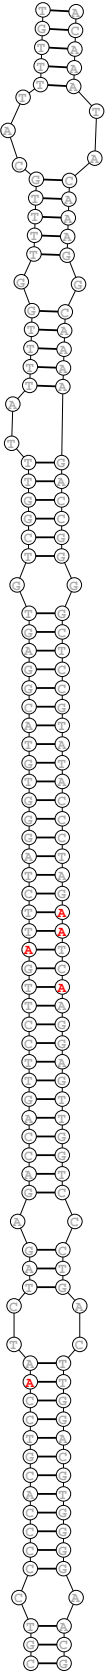

**SHAPE  $\geq 0.85$**

234

**0.85 > SHAPE  $\geq 0.4$**

**0.4 > SHAPE**

No Data

**ENERGY = -108.0 Chr6:92062308-92062...**

# RETSAT part A

Strands Chr11:49483509-49483697  
and Chr11:49484802-49484990

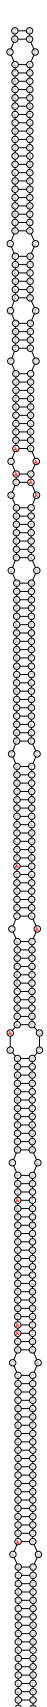

**SHAPE >= 0.85**

235

**0.85 > SHAPE >= 0.4**

**0.4 > SHAPE**

No Data

**ENERGY = -315.8 Chr11:49483509-4948...**

# RETSAT part B

Strands Chr11:49483532-49483662  
and Chr11:49485209-49485339

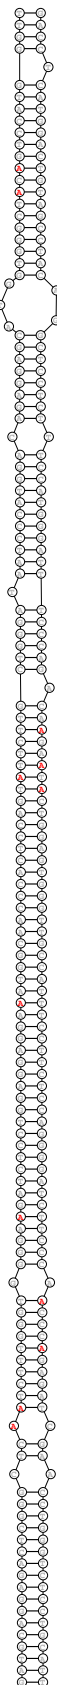

**SHAPE >= 0.85**

236

**0.85 > SHAPE >= 0.4**

**0.4 > SHAPE**

No Data

**ENERGY = -234.7 Chr11:49483532-4948...**

# RGCC

Strands Chr12:11631066-11631183  
and Chr12:11631406-11631524

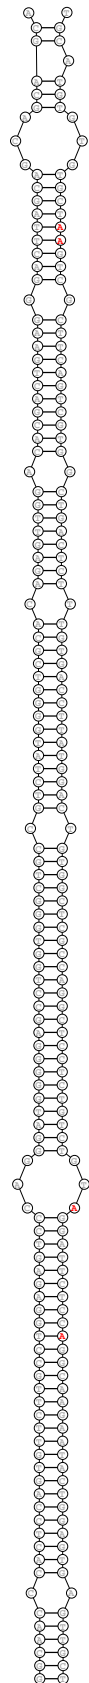

**SHAPE >= 0.85**

237

**0.85 > SHAPE >= 0.4**

**0.4 > SHAPE**

No Data

**ENERGY = -192.2 Chr12:11631066-1163...**

# RHBDF1 part A

Strands Chr25:123457-123572  
and Chr25:123791-123917

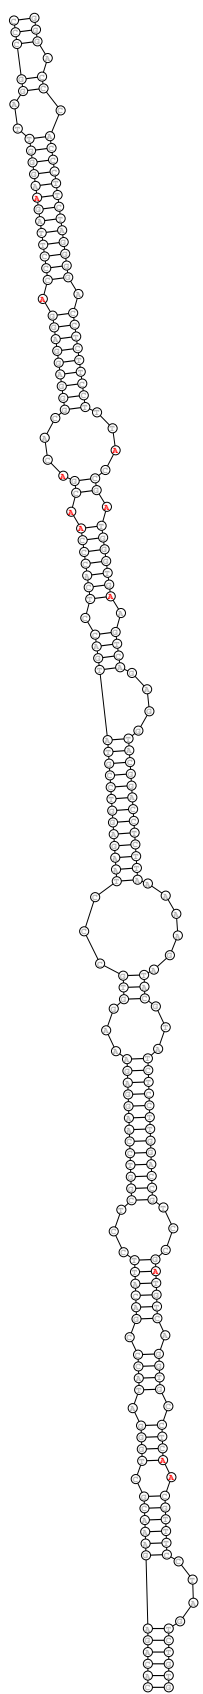

**SHAPE  $\geq$  0.85**

238

**0.85 > SHAPE  $\geq$  0.4**

**0.4 > SHAPE**

No Data

**ENERGY = -143.9 Chr25:123457-123572...**

# RHBDF1 part B

Strands Chr25:123791-123936  
and Chr25:124152-124280

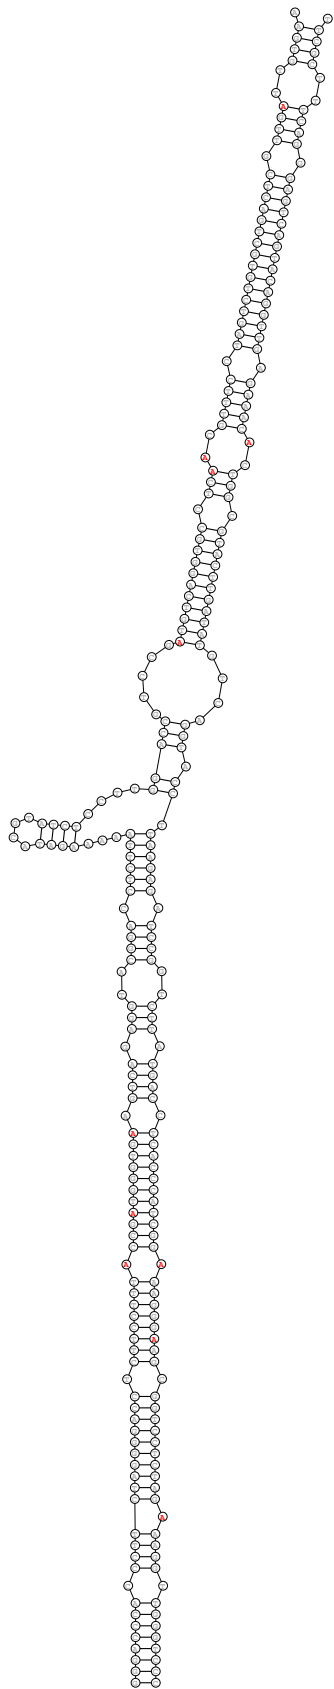

**SHAPE >= 0.85**

239

**0.85 > SHAPE >= 0.4**

**0.4 > SHAPE**

No Data

**ENERGY = -161.3 Chr25:123791-123936...**

# RHBDF1 part C

Strands Chr25:124159-124200  
and Chr25:125356-125397

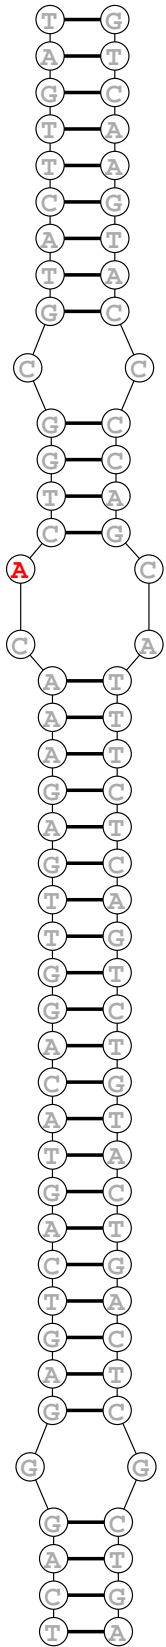

**SHAPE >= 0.85**

240

**0.85 > SHAPE >= 0.4**

**0.4 > SHAPE**

No Data

**ENERGY = -58.5 Chr25:124159-124200\_...**



# RNASE4

Strands Chr10:26428235-26428296  
and Chr10:26428769-26428831

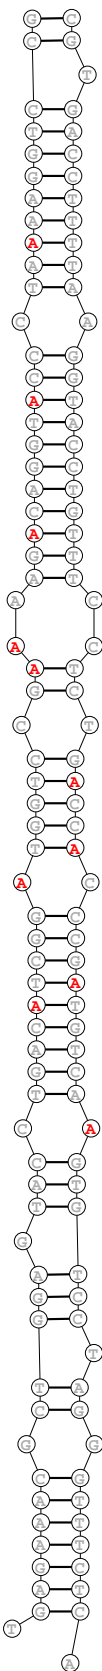

**SHAPE  $\geq$  0.85**

241

**0.85 > SHAPE  $\geq$  0.4**

**0.4 > SHAPE**

No Data

**ENERGY = -78.2 Chr10:26428235-26428...**

# RNF130

Strands Chr7:1202572-1202646  
and Chr7:1203804-1203884

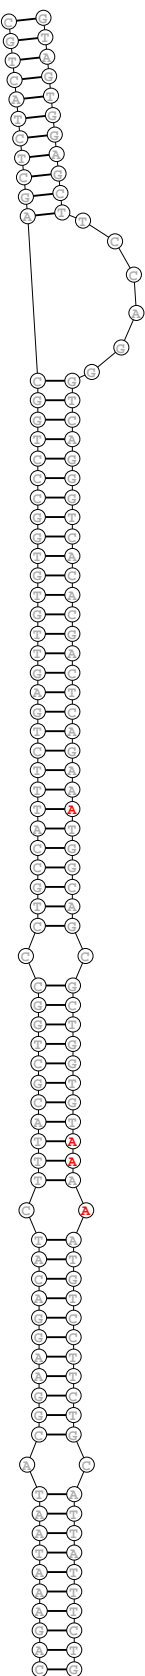

**SHAPE  $\geq 0.85$**

242

**0.85 > SHAPE  $\geq 0.4$**

**0.4 > SHAPE**

No Data

**ENERGY = -116.9 Chr7:1202572-120264...**

# RNF149

Strands Chr11:6205734-6205821  
and Chr11:6206196-6206284

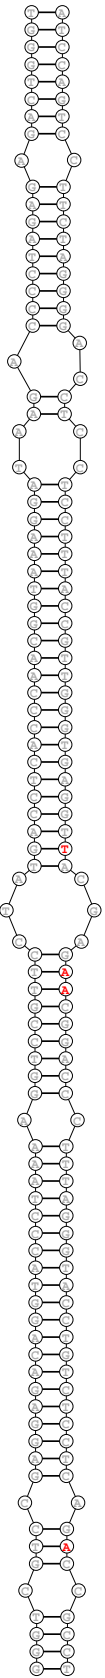

**SHAPE >= 0.85**

243

**0.85 > SHAPE >= 0.4**

**0.4 > SHAPE**

No Data

**ENERGY = -139.4 Chr11:6205734-62058...**

# RNF31

Strands Chr10:20829492-20829512  
and Chr10:20829863-20829883

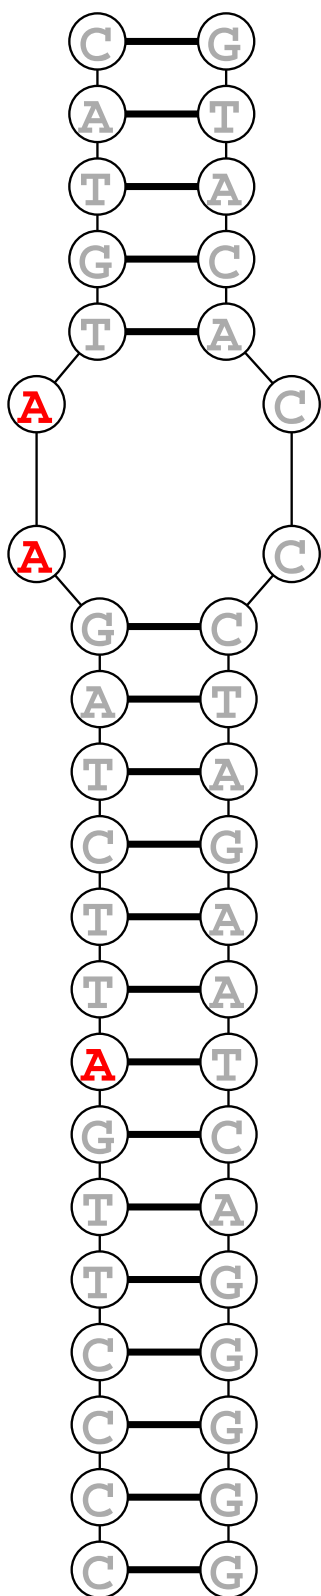

**SHAPE >= 0.85**

244

**0.85 > SHAPE >= 0.4**

**0.4 > SHAPE**

No Data

**ENERGY = -29.1 Chr10:20829492-20829...**

# RNF4 part A

Strands Chr6:108313731-108313853  
and Chr6:108316780-108316905

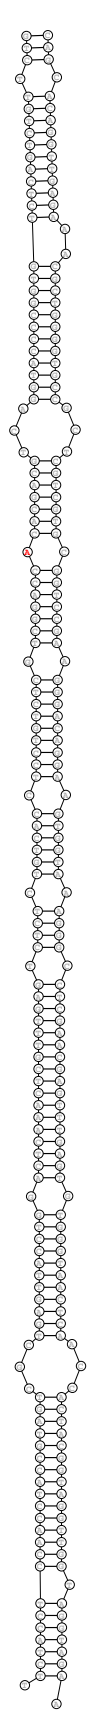

**SHAPE  $\geq$  0.85**

245

**0.85 > SHAPE  $\geq$  0.4**

**0.4 > SHAPE**

No Data

**ENERGY = -181.3 Chr6:108313731-1083...**

# RNF4 part B

Strands Chr6:108315802-108315941  
and Chr6:108316769-108316908

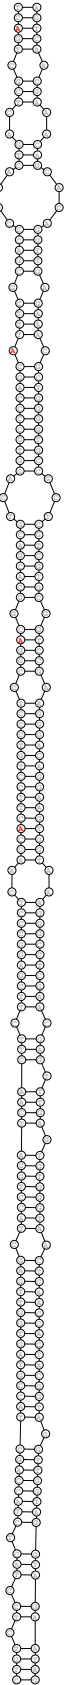

**SHAPE  $\geq$  0.85**

246

**0.85 > SHAPE  $\geq$  0.4**

**0.4 > SHAPE**

No Data

**ENERGY = -197.7 Chr6:108315802-1083...**

RNF44

Strands Chr7:39353595-39353611  
and Chr7:39353618-39353634

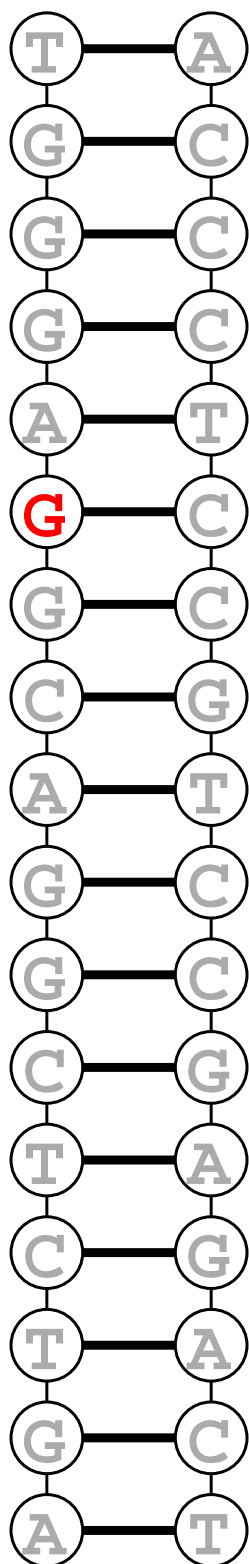

**SHAPE >= 0.85**

247

**0.85 > SHAPE >= 0.4**

**0.4 > SHAPE**

No Data

**ENERGY = -35.4 Chr7:39353595-393536...**

# RPAP2

Strands Chr3:51195752-51195856  
and Chr3:51196947-51197046

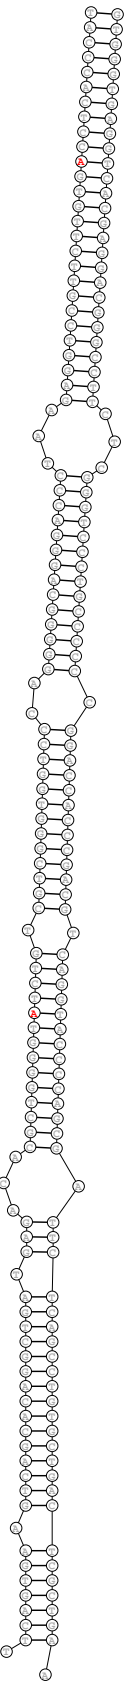

**SHAPE >= 0.85**

248

**0.85 > SHAPE >= 0.4**

**0.4 > SHAPE**

No Data

**ENERGY = -193.3 Chr3:51195752-51195...**



# RPS6KA4 part A

Strands Chr29:43277121-43277195  
and Chr29:43278511-43278595

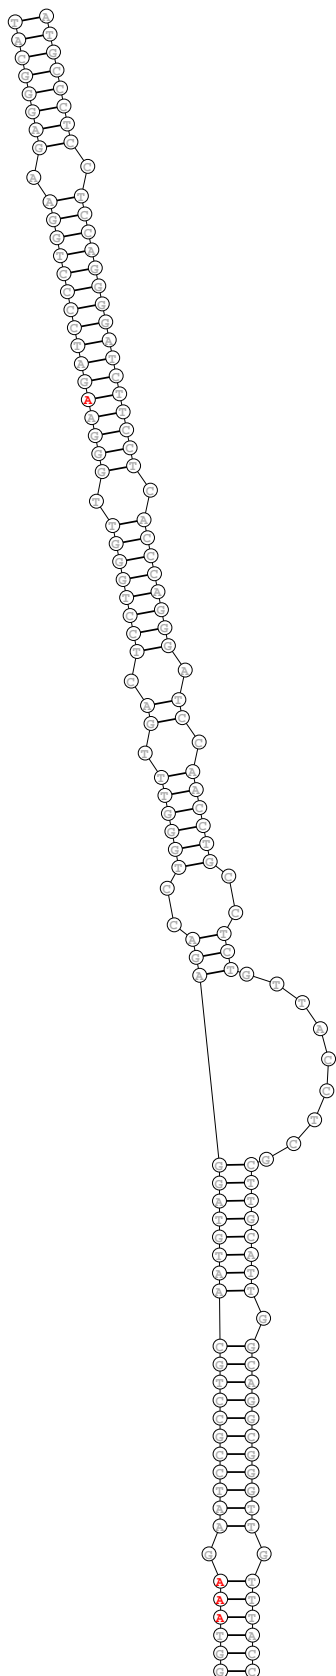

**SHAPE  $\geq$  0.85**

249

**0.85 > SHAPE  $\geq$  0.4**

**0.4 > SHAPE**

No Data

**ENERGY = -110.2 Chr29:43277121-4327...**

# RPS6KA4 part B

Strands Chr29:43278317-43278362  
and Chr29:43278406-43278452

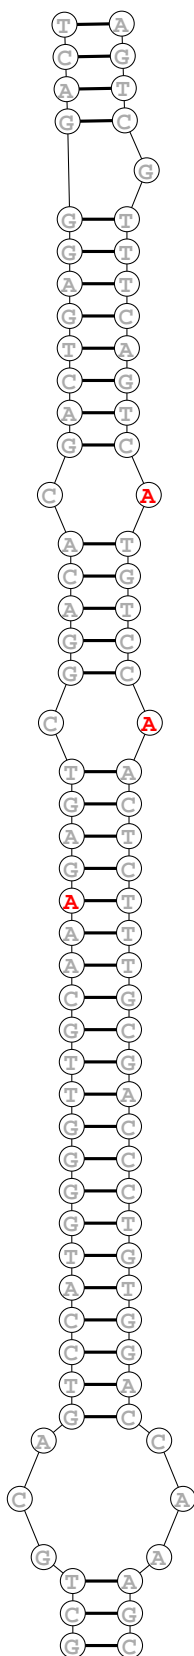

**SHAPE >= 0.85**

250

**0.85 > SHAPE >= 0.4**

**0.4 > SHAPE**

No Data

**ENERGY = -64.9 Chr29:43278317-43278...**

# RPS9 part A

Strands Chr18:63384137-63384224  
and Chr18:63385638-63385728

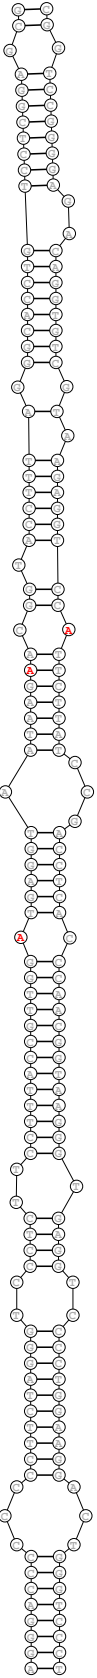

**SHAPE  $\geq 0.85$**

251

**0.85 > SHAPE  $\geq 0.4$**

**0.4 > SHAPE**

No Data

**ENERGY = -122.8 Chr18:63384137-6338...**

# RPS9 part B

Strands Chr18:63385755-63385837  
and Chr18:63385870-63385951

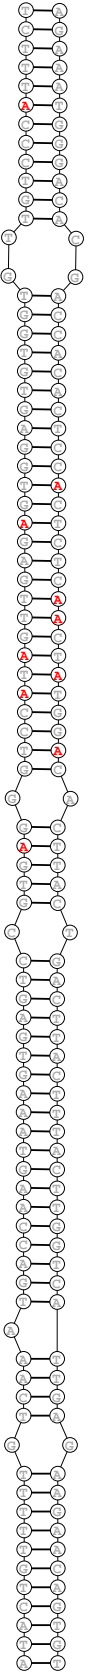

**SHAPE >= 0.85**

252

**0.85 > SHAPE >= 0.4**

**0.4 > SHAPE**

No Data

**ENERGY = -129.6 Chr18:63385755-6338...**

# RRN3

Strands Chr25:13794131-13794258  
and Chr25:13794674-13794801

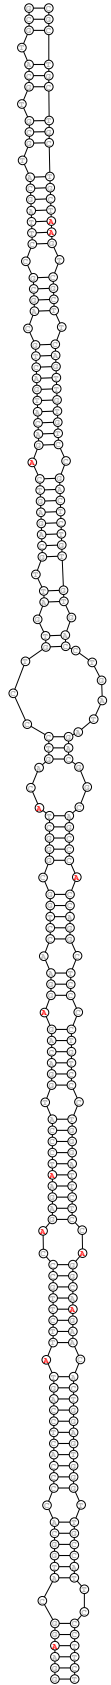

**SHAPE  $\geq$  0.85**

253

**0.85 > SHAPE  $\geq$  0.4**

**0.4 > SHAPE**

No Data

**ENERGY = -168.8 Chr25:13794131-1379...**

# RUFY3

Strands Chr6:87902586-87902785  
and Chr6:87903261-87903459

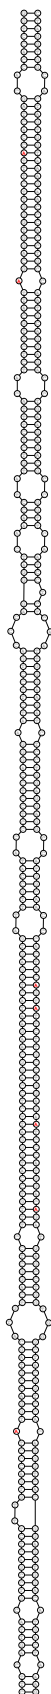

**SHAPE >= 0.85**

254

**0.85 > SHAPE >= 0.4**

**0.4 > SHAPE**

No Data

**ENERGY = -306.2 Chr6:87902586-87902...**

# SCN1B part A

Strands Chr18:45966962-45967093  
and Chr18:45967857-45967982

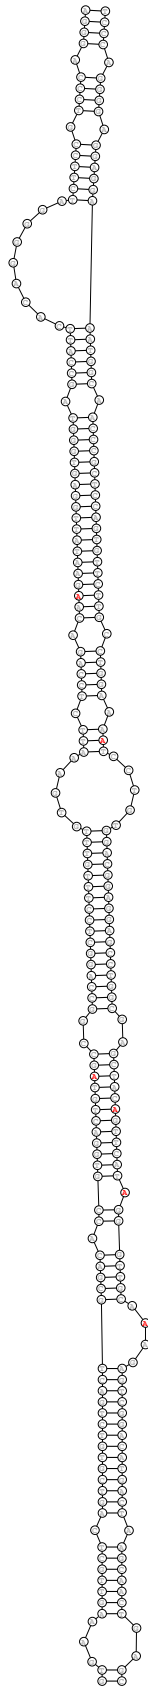

**SHAPE >= 0.85**

255

**0.85 > SHAPE >= 0.4**

**0.4 > SHAPE**

No Data

**ENERGY = -166.8 Chr18:45966962-4596...**

# SCN1B part B

Strands Chr18:45967316-45967436  
and Chr18:45967864-45967988

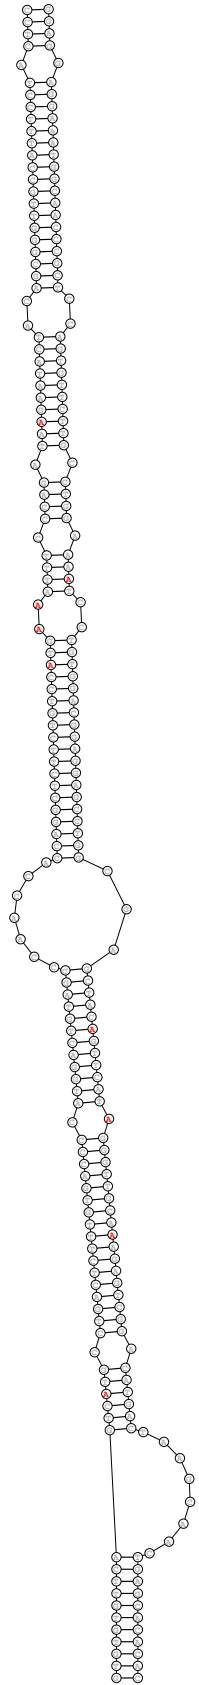

**SHAPE >= 0.85**

256

**0.85 > SHAPE >= 0.4**

**0.4 > SHAPE**

No Data

**ENERGY = -167.6 Chr18:45967316-4596...**



# SCN1B part C

Strands Chr18:45965592-45965794  
and Chr18:45966973-45967155

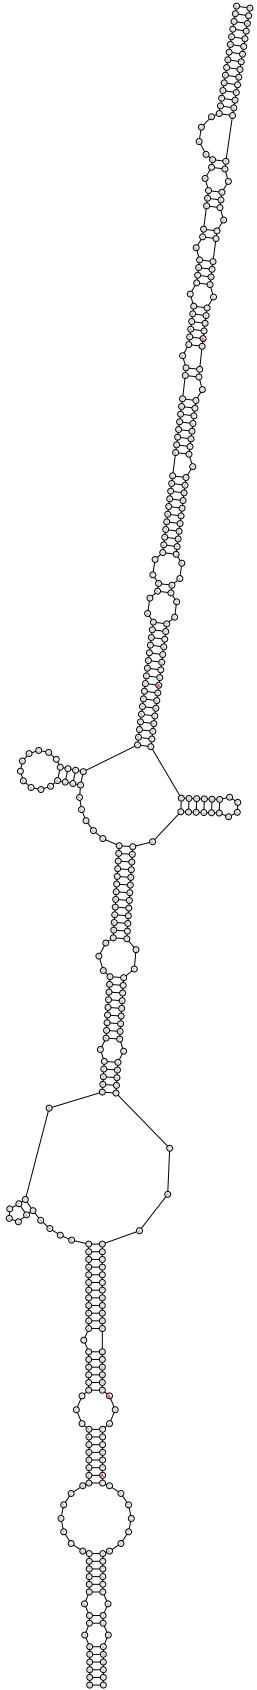

**SHAPE >= 0.85**

257

**0.85 > SHAPE >= 0.4**

**0.4 > SHAPE**

No Data

**ENERGY = -228.9 Chr18:45965592-4596...**

# SCN1B part D

Strands Chr18:45965615-45965795  
and Chr18:45967323-45967507

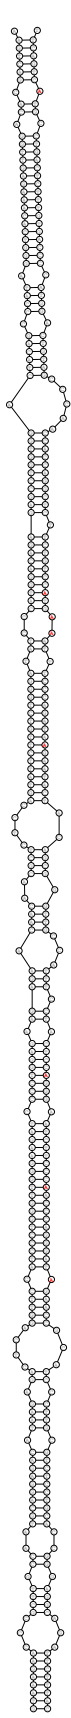

**SHAPE >= 0.85**

258

**0.85 > SHAPE >= 0.4**

**0.4 > SHAPE**

No Data

**ENERGY = -239.2 Chr18:45965615-4596...**

# SEC11C

Strands Chr24:58668315-58668406  
and Chr24:58668686-58668776

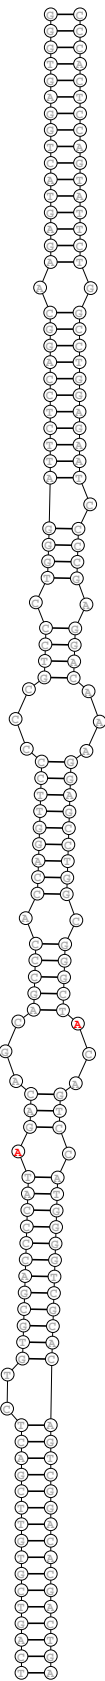

**SHAPE >= 0.85**

259

**0.85 > SHAPE >= 0.4**

**0.4 > SHAPE**

No Data

**ENERGY = -152.5 Chr24:58668315-5866...**

# SEC61A1

Strands Chr22:60226036-60226146  
and Chr22:60226830-60226942

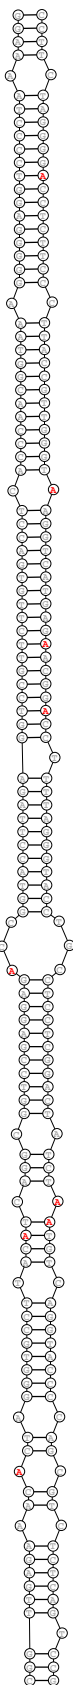

**SHAPE >= 0.85**

260

**0.85 > SHAPE >= 0.4**

**0.4 > SHAPE**

No Data

**ENERGY = -166.7 Chr22:60226036-6022...**

# SEPN1

Strands Chr2:127851153-127851386  
and Chr2:127851839-127852064

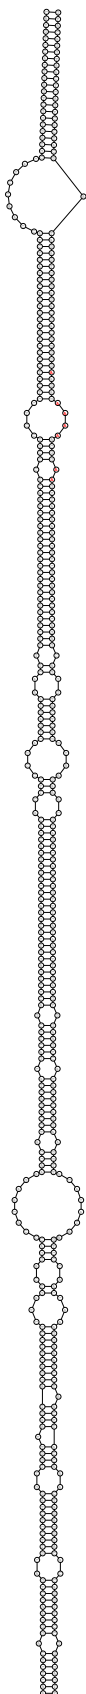

**SHAPE >= 0.85**

261

**0.85 > SHAPE >= 0.4**

**0.4 > SHAPE**

No Data

**ENERGY = -324.6 Chr2:127851153-1278...**



# SLC18B1 part A

Strands Chr9:71962040-71962157  
and Chr9:71962333-71962448

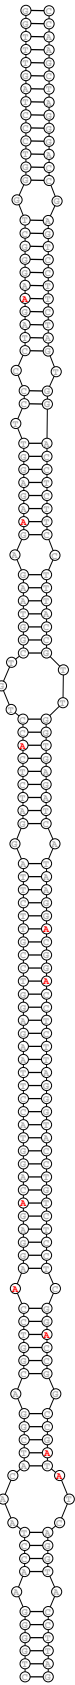

**SHAPE  $\geq 0.85$**

263

**0.85 > SHAPE  $\geq 0.4$**

**0.4 > SHAPE**

No Data

**ENERGY = -186.9 Chr9:71962040-71962...**

SLC18B1 part B

Strands Chr9:71962013-71962213  
and Chr9:71963687-71963880

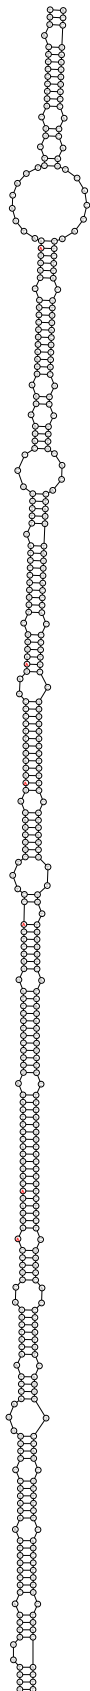

**SHAPE >= 0.85**

264

**0.85 > SHAPE >= 0.4**

**0.4 > SHAPE**

No Data

**ENERGY = -245.0 Chr9:71962013-71962...**



# SLC1A1 part A

Strands Chr8:40193586-40193701  
and Chr8:40194966-40195079

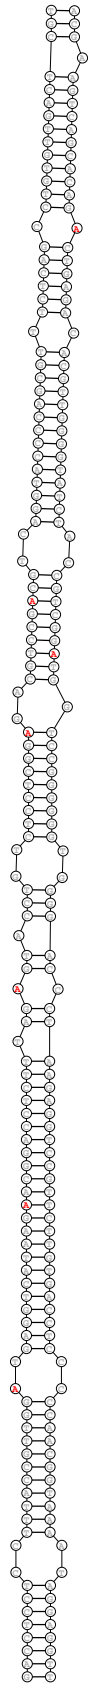

**SHAPE  $\geq$  0.85**

265

**0.85 > SHAPE  $\geq$  0.4**

**0.4 > SHAPE**

No Data

**ENERGY = -172.8 Chr8:40193586-40193...**

# SLC1A1 part B

Strands Chr8:40194718-40194802  
and Chr8:40195118-40195203

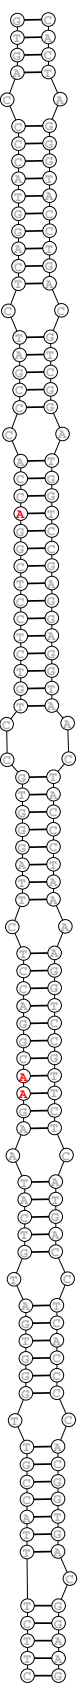

**SHAPE >= 0.85**

266

**0.85 > SHAPE >= 0.4**

**0.4 > SHAPE**

No Data

**ENERGY = -125.0 Chr8:40194718-40194...**

# SLC20A1

Strands Chr11:46227687-46227795  
and Chr11:46227927-46228038

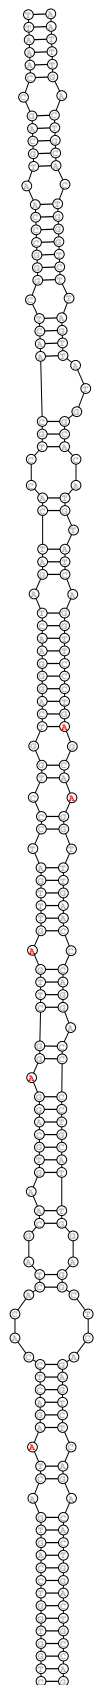

**SHAPE >= 0.85**

267

**0.85 > SHAPE >= 0.4**

**0.4 > SHAPE**

No Data

**ENERGY = -118.3 Chr11:46227687-4622...**

# SLC22A16 part A

Strands Chr9:40247293-40247450  
and Chr9:40248583-40248744

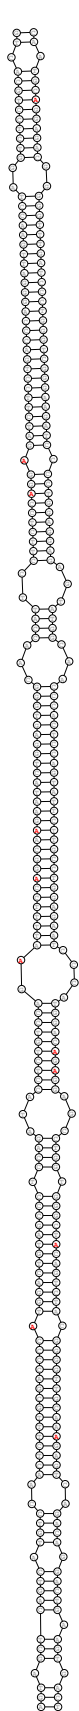

**SHAPE  $\geq 0.85$**

268

**0.85 > SHAPE  $\geq 0.4$**

**0.4 > SHAPE**

No Data

**ENERGY = -247.8 Chr9:40247293-40247...**

SLC22A16 part B

Strands Chr9:40248269-40248343  
and Chr9:40248541-40248615

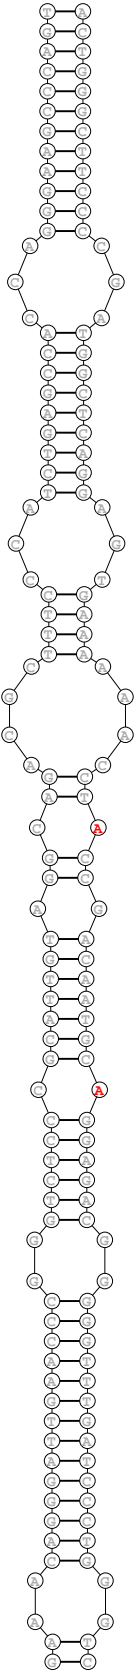

**SHAPE >= 0.85**

269

**0.85 > SHAPE >= 0.4**

**0.4 > SHAPE**

**No Data**

**ENERGY = -93.6 Chr9:40248269-402483...**

SLC22A16 part C

Strands Chr9:40248626-40248753  
and Chr9:40249203-40249327

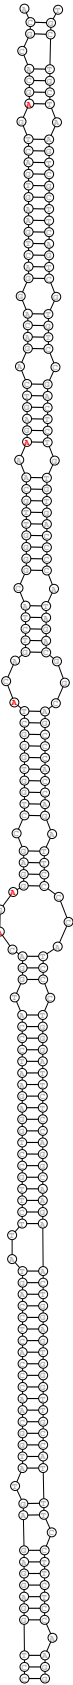

**SHAPE >= 0.85**

270

**0.85 > SHAPE >= 0.4**

**0.4 > SHAPE**

No Data

**ENERGY = -192.5 Chr9:40248626-40248...**

SLC22A16 part D

Strands Chr9:40255063-40255166  
and Chr9:40255801-40255903

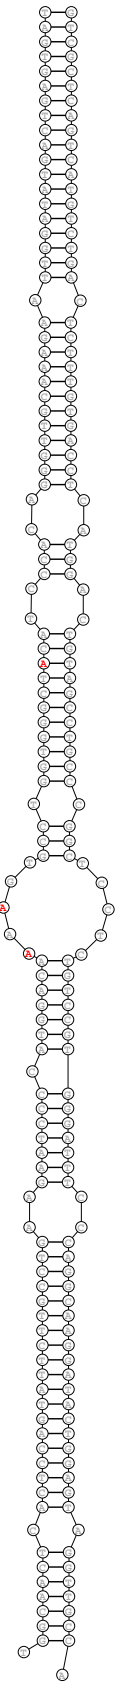

**SHAPE >= 0.85**

271

**0.85 > SHAPE >= 0.4**

**0.4 > SHAPE**

No Data

**ENERGY = -146.7 Chr9:40255063-40255...**

SLC22A16 part E

Strands Chr9:40254438-40254687  
and Chr9:40256349-40256599

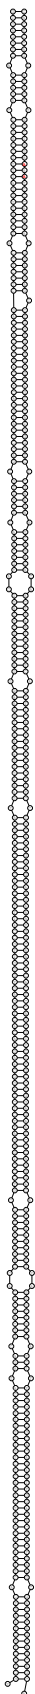

**SHAPE >= 0.85**

272

**0.85 > SHAPE >= 0.4**

**0.4 > SHAPE**

No Data

**ENERGY = -476.4 Chr9:40254438-40254...**



SLC22A16 part F

Strands Chr9:40259234-40259300  
and Chr9:40259493-40259559

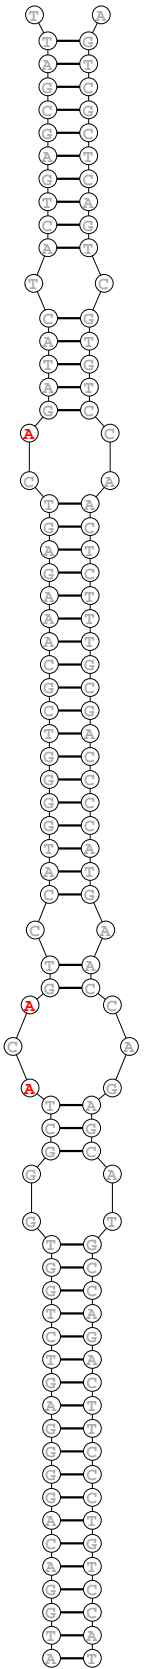

**SHAPE >= 0.85**

273

**0.85 > SHAPE >= 0.4**

**0.4 > SHAPE**

No Data

**ENERGY = -103.7 Chr9:40259234-40259...**

# SLC34A2

Strands Chr6:46726713-46726860  
and Chr6:46728179-46728332

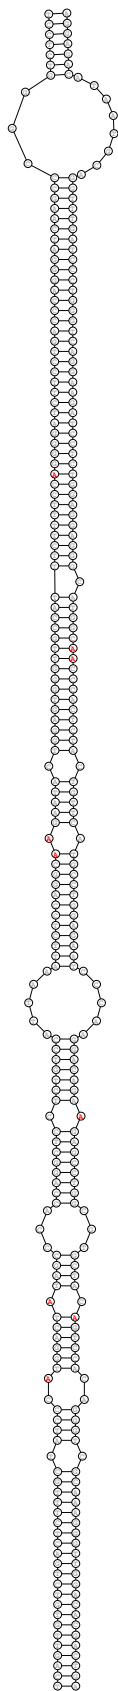

**SHAPE  $\geq 0.85$**

274

**0.85 > SHAPE  $\geq 0.4$**

**0.4 > SHAPE**

No Data

**ENERGY = -228.7 Chr6:46726713-46726...**

# SLC37A1

Strands Chr1:144432779-144432893  
and Chr1:144433320-144433437

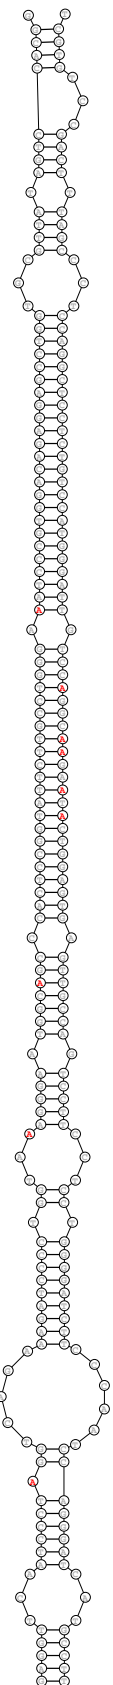

**SHAPE  $\geq$  0.85**

275

**0.85 > SHAPE  $\geq$  0.4**

**0.4 > SHAPE**

No Data

**ENERGY = -162.2 Chr1:144432779-1444...**

# SLC5A9

Strands Chr3:98572440-98572525  
and Chr3:98572798-98572883

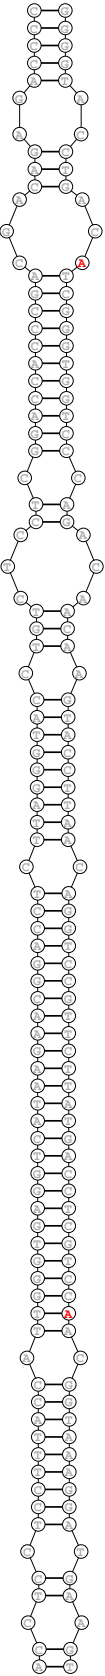

**SHAPE  $\geq$  0.85**

276

**0.85 > SHAPE  $\geq$  0.4**

**0.4 > SHAPE**

No Data

**ENERGY = -114.7 Chr3:98572440-98572...**

# SLC8B1

Strands Chr17:63567333-63567425  
and Chr17:63568763-63568856

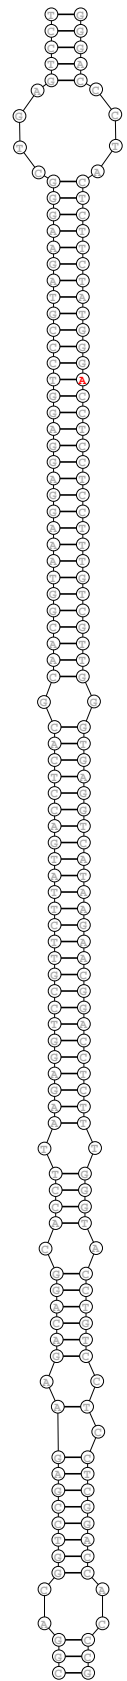

**SHAPE >= 0.85**

277

**0.85 > SHAPE >= 0.4**

**0.4 > SHAPE**

No Data

**ENERGY = -152.7 Chr17:63567333-6356...**

# SMIM19

Strands Chr27:37069361-37069397  
and Chr27:37069804-37069840

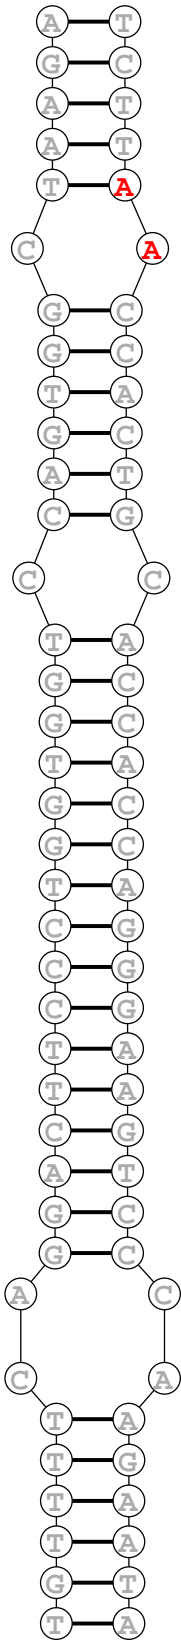

**SHAPE >= 0.85**

278

**0.85 > SHAPE >= 0.4**

**0.4 > SHAPE**

No Data

**ENERGY = -51.9 Chr27:37069361-37069...**

# SNRNP40 part A

Strands Chr2:122900846-122901019  
and Chr2:122901559-122901723

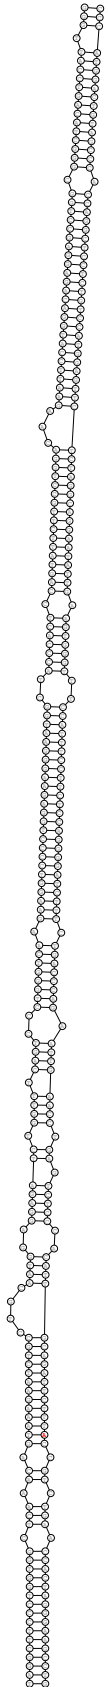

**SHAPE >= 0.85**

279

**0.85 > SHAPE >= 0.4**

**0.4 > SHAPE**

No Data

**ENERGY = -267.4 Chr2:122900846-1229...**

# SNRNP40 part B

Strands Chr2:122900848-122900953  
and Chr2:122901723-122901828

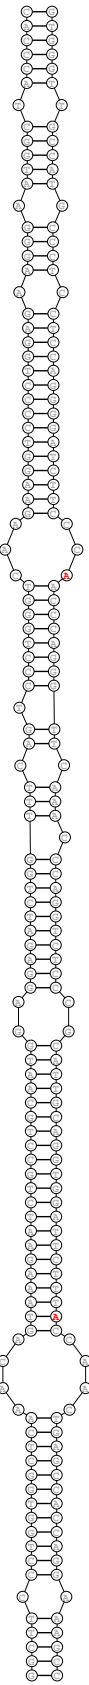

**SHAPE >= 0.85**

280

**0.85 > SHAPE >= 0.4**

**0.4 > SHAPE**

No Data

**ENERGY = -163.1 Chr2:122900848-1229...**



# SPINT2

Strands Chr18:48319628-48319720  
and Chr18:48321070-48321164

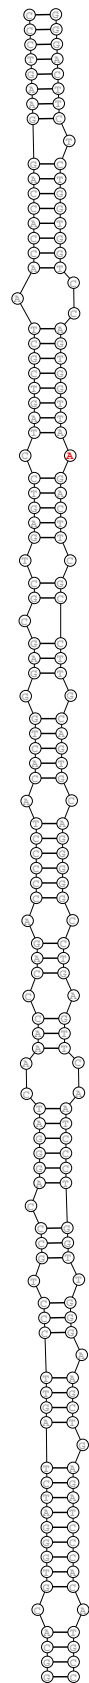

**SHAPE >= 0.85**

281

**0.85 > SHAPE >= 0.4**

**0.4 > SHAPE**

No Data

**ENERGY = -125.7 Chr18:48319628-4831...**

# SPTLC1

Strands Chr8:87277263-87277370  
and Chr8:87277871-87277978

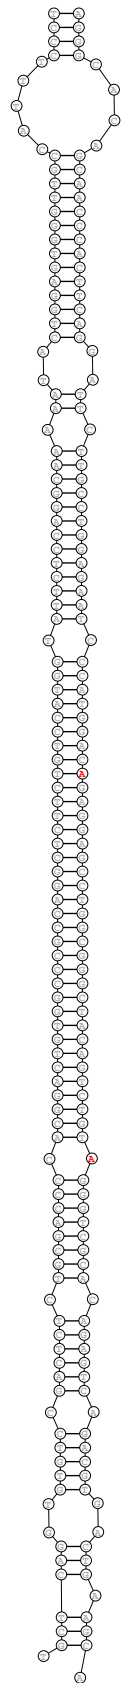

**SHAPE  $\geq$  0.85**

282

**0.85 > SHAPE  $\geq$  0.4**

**0.4 > SHAPE**

No Data

**ENERGY = -175.5 Chr8:87277263-87277...**

# SPTSSA

Strands Chr21:45304183-45304284  
and Chr21:45305295-45305397

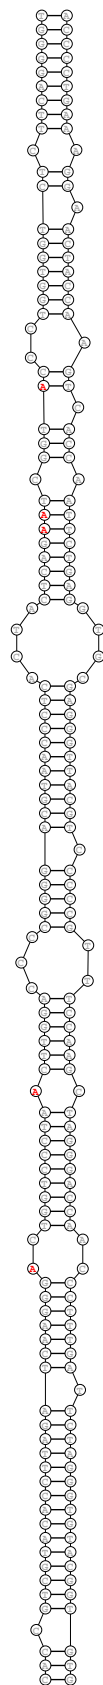

**SHAPE >= 0.85**

283

**0.85 > SHAPE >= 0.4**

**0.4 > SHAPE**

No Data

**ENERGY = -136.2 Chr21:45304183-4530...**

STK19 part A

Strands Chr23:27198820-27198975  
and Chr23:27199165-27199330

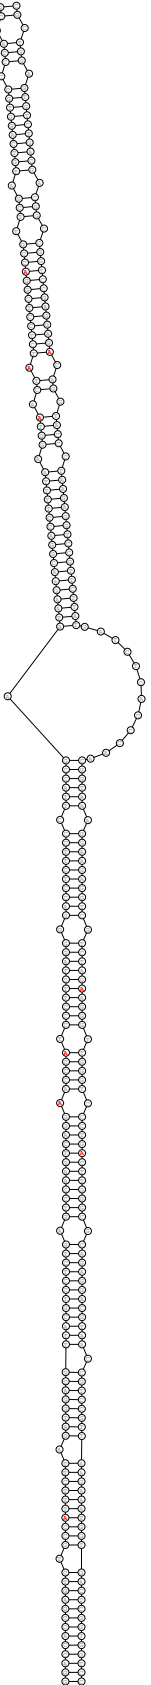

**SHAPE >= 0.85**

284

**0.85 > SHAPE >= 0.4**

**0.4 > SHAPE**

No Data

**ENERGY = -237.8 Chr23:27198820-2719...**

STK19 part B

Strands Chr23:27202223-27202362  
and Chr23:27203049-27203182

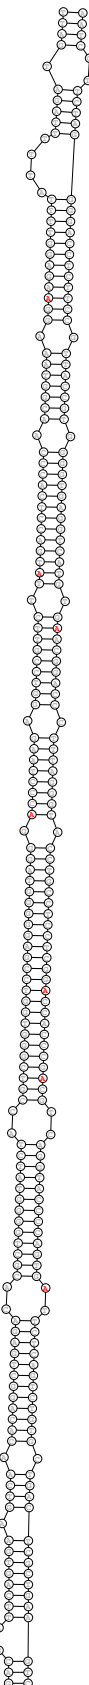

**SHAPE >= 0.85**

285

**0.85 > SHAPE >= 0.4**

**0.4 > SHAPE**

No Data

**ENERGY = -210.2 Chr23:27202223-2720...**

STK19 part C

Strands Chr23:27203040-27203178  
and Chr23:27203696-27203835

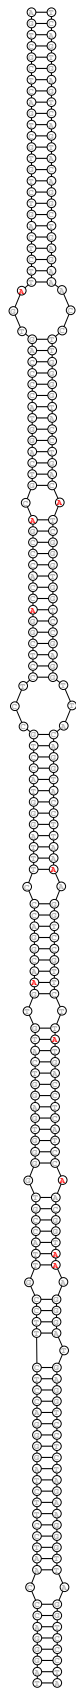

**SHAPE >= 0.85**

286

**0.85 > SHAPE >= 0.4**

**0.4 > SHAPE**

No Data

**ENERGY = -238.4 Chr23:27203040-2720...**

# SUCO

Strands Chr16:40969985-40970056  
and Chr16:40970870-40970941

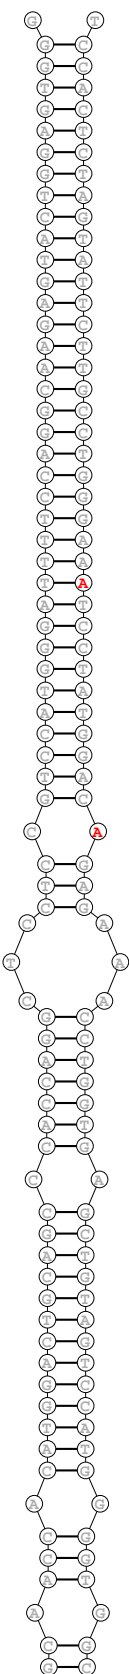

**SHAPE >= 0.85**

287

**0.85 > SHAPE >= 0.4**

**0.4 > SHAPE**

No Data

**ENERGY = -117.9 Chr16:40969985-4097...**

# TAGLN2

Strands Chr3:9883374-9883501  
and Chr3:9883727-9883857

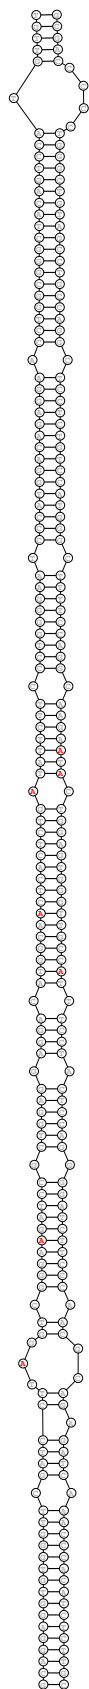

**SHAPE >= 0.85**

288

**0.85 > SHAPE >= 0.4**

**0.4 > SHAPE**

No Data

**ENERGY = -200.1 Chr3:9883374-988350...**



# TARBP1

Strands Chr28:7246953-7247025  
and Chr28:7247341-7247413

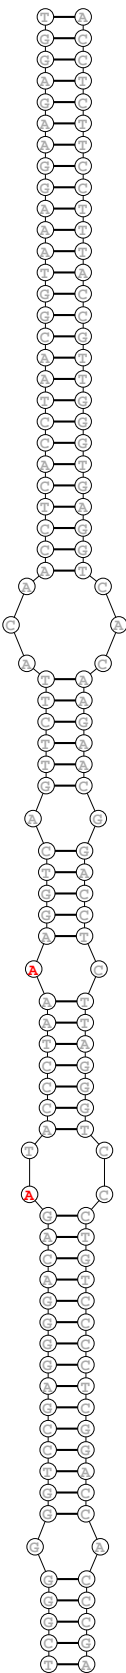

**SHAPE >= 0.85**

289

**0.85 > SHAPE >= 0.4**

**0.4 > SHAPE**

No Data

**ENERGY = -122.5 Chr28:7246953-72470...**

# TCN2

Strands Chr17:71723154-71723301  
and Chr17:71724169-71724317

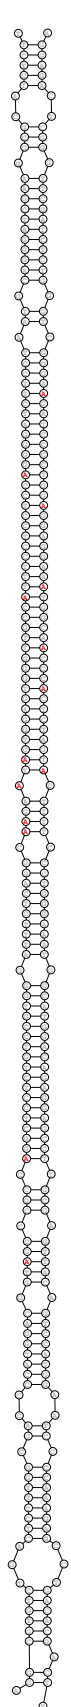

**SHAPE >= 0.85**

290

**0.85 > SHAPE >= 0.4**

**0.4 > SHAPE**

No Data

**ENERGY = -235.6 Chr17:71723154-7172...**

# TJP3

Strands Chr7:21453419-21453560  
and Chr7:21453863-21454003

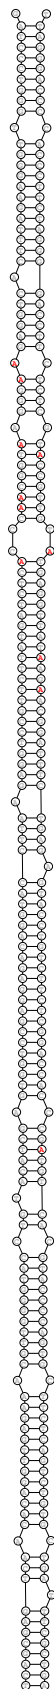

**SHAPE >= 0.85**

291

**0.85 > SHAPE >= 0.4**

**0.4 > SHAPE**

No Data

**ENERGY = -209.3 Chr7:21453419-21453...**

# TMED2

Strands Chr17:54331585-54331695  
and Chr17:54332066-54332177

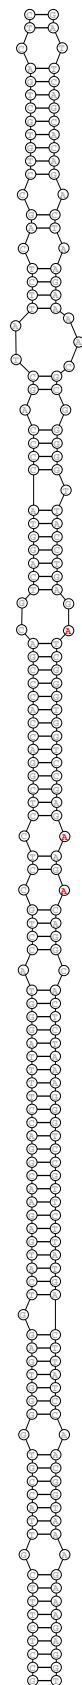

**SHAPE >= 0.85**

292

**0.85 > SHAPE >= 0.4**

**0.4 > SHAPE**

No Data

**ENERGY = -159.6 Chr17:54331585-5433...**

TMEM120B part A

Strands Chr17:55780955-55781155  
and Chr17:55784974-55785164

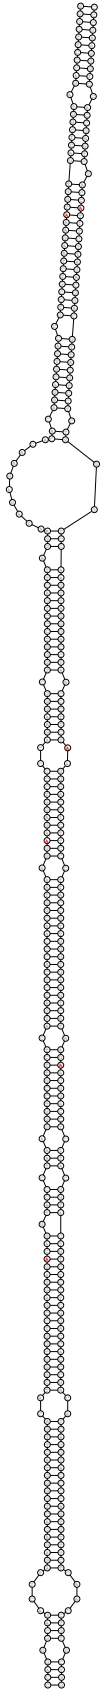

**SHAPE >= 0.85**

293

**0.85 > SHAPE >= 0.4**

**0.4 > SHAPE**

No Data

**ENERGY = -321.6 Chr17:55780955-5578...**

TMEM120B part B

Strands Chr17:55790658-55790877  
and Chr17:55791789-55792008

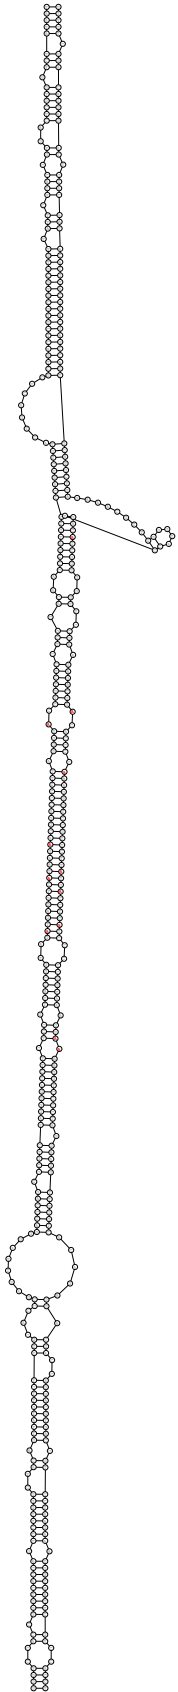

**SHAPE >= 0.85**

294

**0.85 > SHAPE >= 0.4**

**0.4 > SHAPE**

No Data

**ENERGY = -252.9 Chr17:55790658-5579...**

TMEM120B part C

Strands Chr17:55792680-55792789  
and Chr17:55791825-55791935

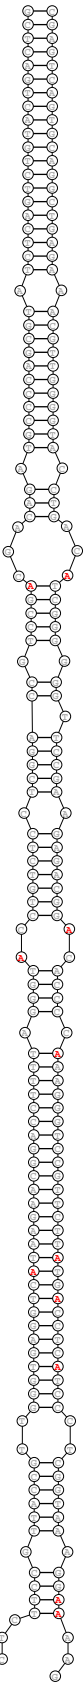

**SHAPE >= 0.85**

295

**0.85 > SHAPE >= 0.4**

**0.4 > SHAPE**

No Data

**ENERGY = -166.6 Chr17:55792680-5579...**

# TMEM120B part D

Strands Chr17:55791825-55791935  
and Chr17:55792824-55792934

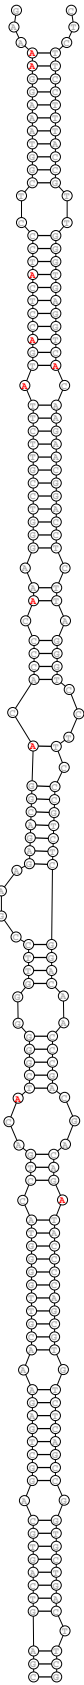

**SHAPE  $\geq$  0.85**

296

**0.85 > SHAPE  $\geq$  0.4**

**0.4 > SHAPE**

No Data

**ENERGY = -149.1 Chr17:55791825-5579...**



# TMEM132A

Strands Chr29:37851212-37851313  
and Chr29:37851628-37851732

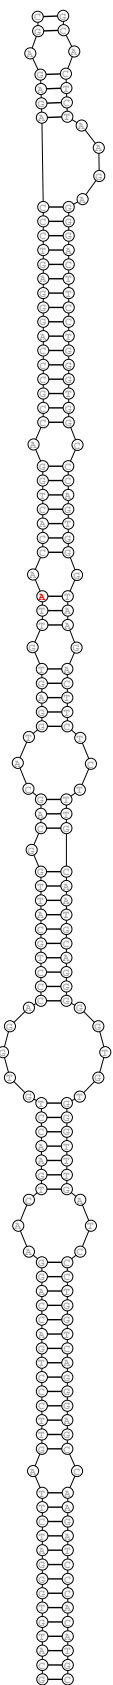

**SHAPE >= 0.85**

297

**0.85 > SHAPE >= 0.4**

**0.4 > SHAPE**

No Data

**ENERGY = -146.3 Chr29:37851212-3785...**

# TMEM63A

Strands Chr16:29640315-29640492  
and Chr16:29640856-29641062

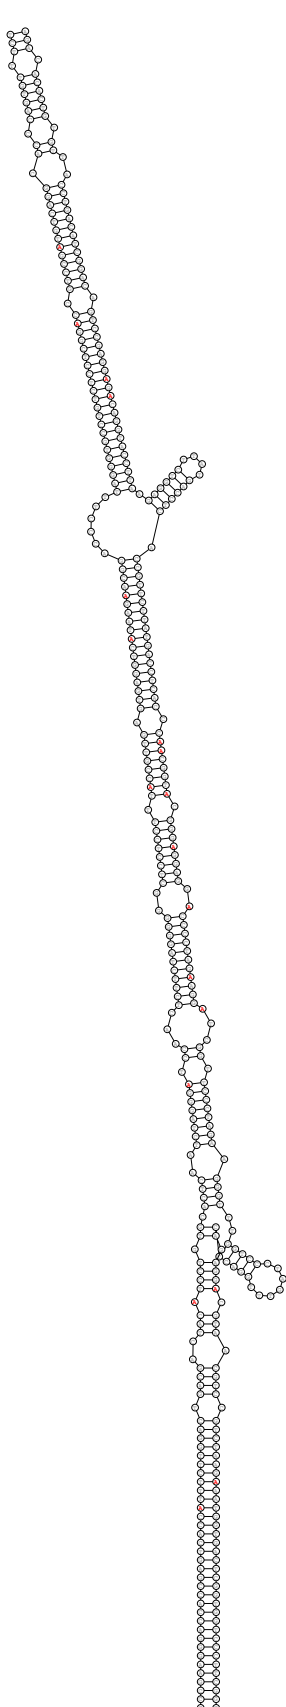

**SHAPE  $\geq$  0.85**

298

**0.85 > SHAPE  $\geq$  0.4**

**0.4 > SHAPE**

No Data

**ENERGY = -288.2 Chr16:29640315-2964...**

# TMEM68

Strands Chr14:24711093-24711110  
and Chr14:24711328-24711344

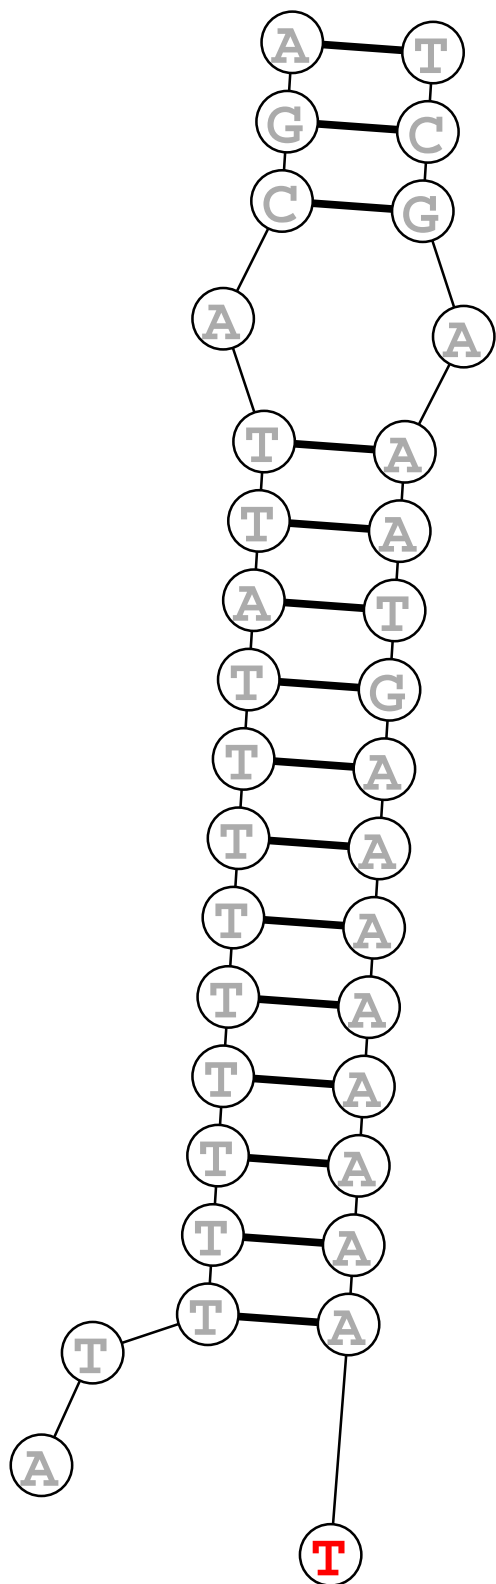

**SHAPE >= 0.85**

299

**0.85 > SHAPE >= 0.4**

**0.4 > SHAPE**

No Data

**ENERGY = -9.9 Chr14:24711093-247111...**

# TOM1L1

Strands Chr19:5268945-5269145  
and Chr19:5271527-5271729

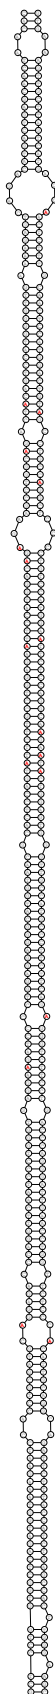

**SHAPE >= 0.85**

300

**0.85 > SHAPE >= 0.4**

**0.4 > SHAPE**

No Data

**ENERGY = -342.3 Chr19:5268945-52691...**

TRMT13 part A

Strands Chr3:43279185-43279282  
and Chr3:43281045-43281143

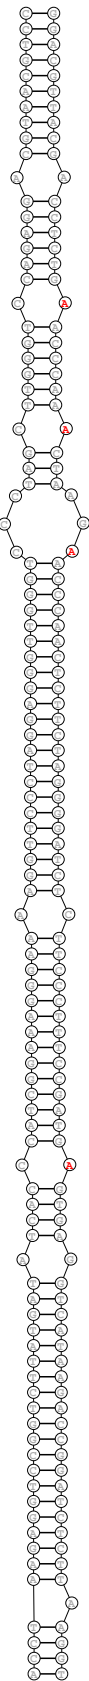

**SHAPE >= 0.85**

301

**0.85 > SHAPE >= 0.4**

**0.4 > SHAPE**

No Data

**ENERGY = -151.0 Chr3:43279185-43279...**

# TRMT13 part B

Strands Chr3:43280189-43280284  
and Chr3:43281107-43281187

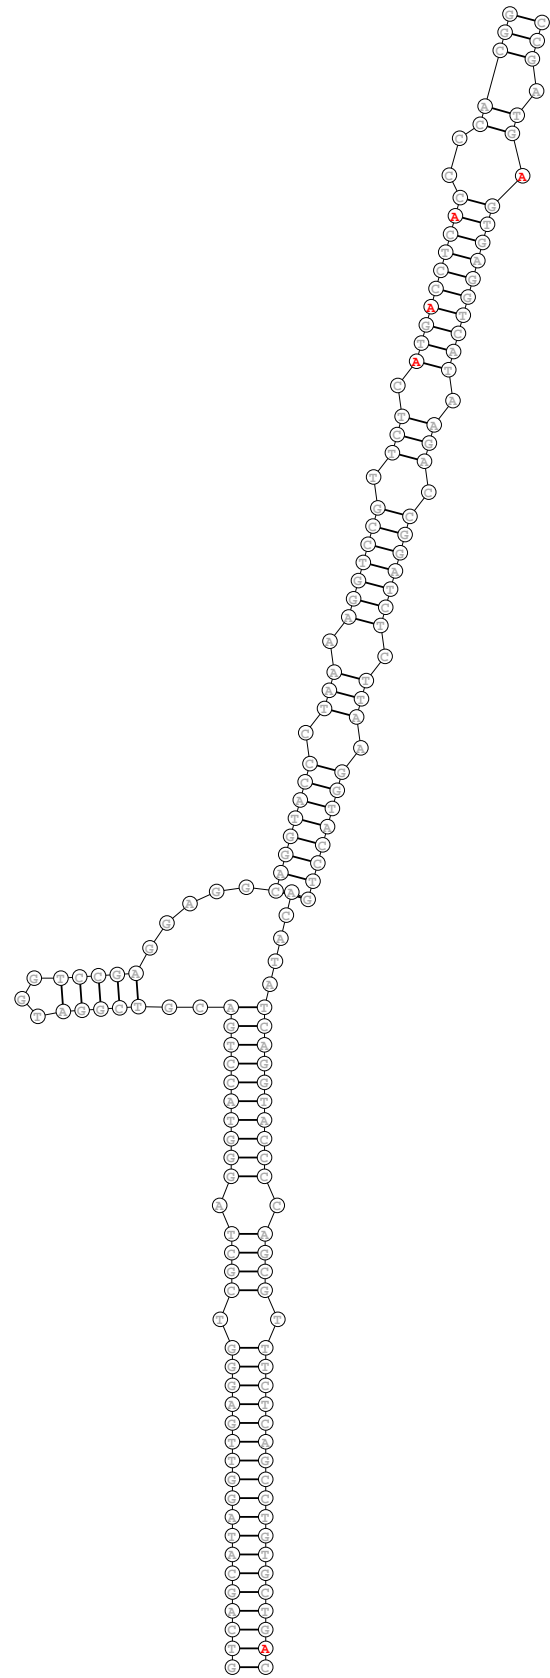

**SHAPE >= 0.85**

302

**0.85 > SHAPE >= 0.4**

**0.4 > SHAPE**

No Data

**ENERGY = -109.8 Chr3:43280189-43280...**

# TULP2

Strands Chr18:55932444-55932661  
and Chr18:55933435-55933619

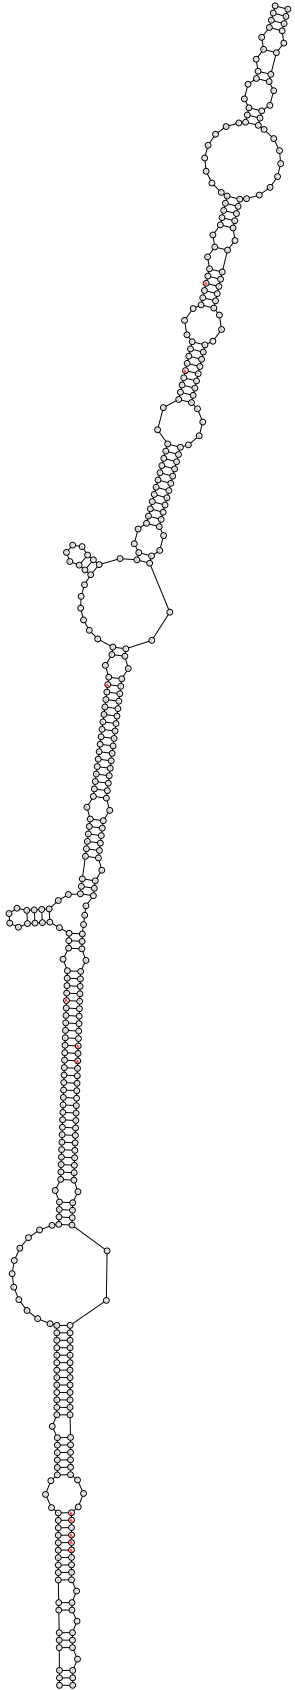

**SHAPE  $\geq 0.85$**

303

**0.85 > SHAPE  $\geq 0.4$**

**0.4 > SHAPE**

No Data

**ENERGY = -219.3 Chr18:55932444-5593...**

# UBALD2

Strands Chr19:56073299-56073395  
and Chr19:56073793-56073889

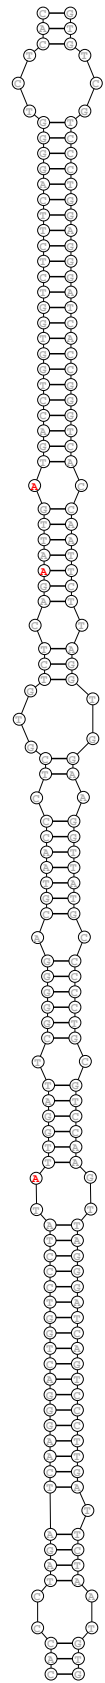

**SHAPE  $\geq$  0.85**

304

**0.85 > SHAPE  $\geq$  0.4**

**0.4 > SHAPE**

No Data

**ENERGY = -129.9 Chr19:56073299-5607...**



# UFSP2 part A

Strands Chr27:14709201-14709264  
and Chr27:14710538-14710601

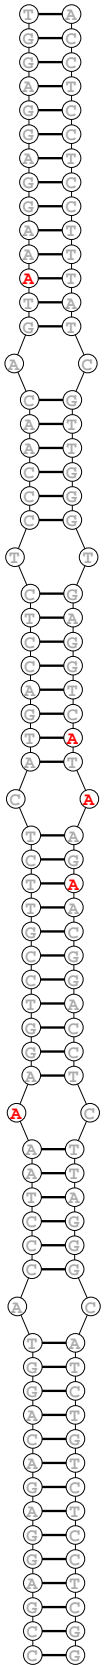

**SHAPE >= 0.85**

305

**0.85 > SHAPE >= 0.4**

**0.4 > SHAPE**

No Data

**ENERGY = -108.2 Chr27:14709201-1470...**

# UFSP2 part B

Strands Chr27:14709201-14709264  
and Chr27:14710673-14710736

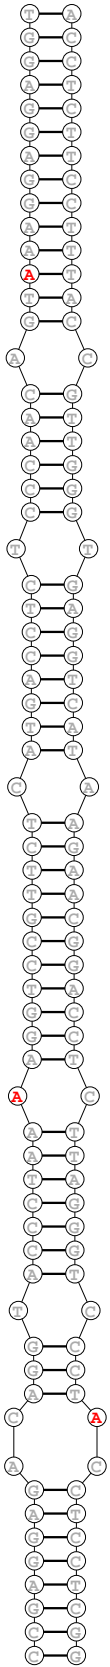

**SHAPE >= 0.85**

306

**0.85 > SHAPE >= 0.4**

**0.4 > SHAPE**

No Data

**ENERGY = -101.2 Chr27:14709201-1470...**

# UFSP2 part C

Strands Chr27:14710673-14710790  
and Chr27:14711531-14711646

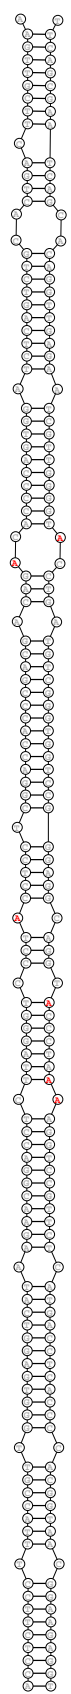

**SHAPE  $\geq$  0.85**

307

**0.85 > SHAPE  $\geq$  0.4**

**0.4 > SHAPE**

No Data

**ENERGY = -175.3 Chr27:14710673-1471...**

# UNC50

Strands Chr11:3797247-3797342  
and Chr11:3798491-3798601

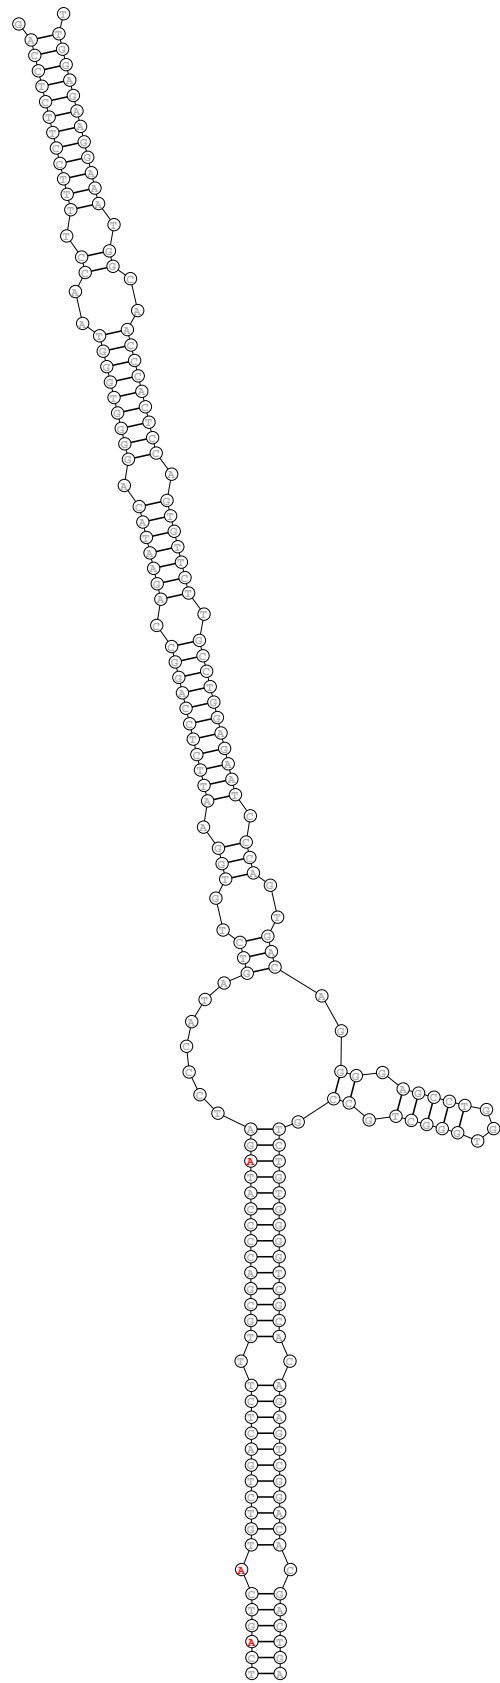

**SHAPE  $\geq$  0.85**

308

**0.85 > SHAPE  $\geq$  0.4**

**0.4 > SHAPE**

No Data

**ENERGY = -146.5 Chr11:3797247-37973...**

# URB2

Strands Chr28:622893-623009  
and Chr28:623872-623985

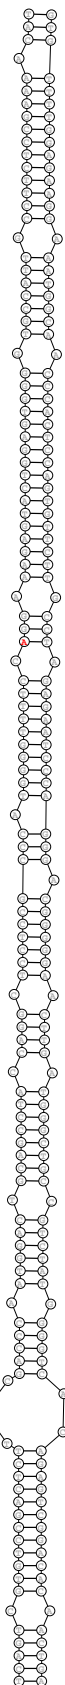

**SHAPE >= 0.85**

309

**0.85 > SHAPE >= 0.4**

**0.4 > SHAPE**

No Data

**ENERGY = -166.8 Chr28:622893-623009...**

# VAMP5 part A

Strands Chr11:49251198-49251405  
and Chr11:49252768-49252960

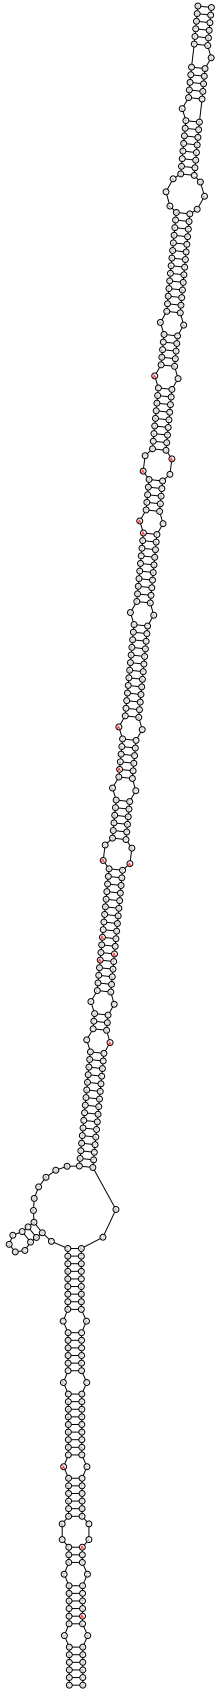

**SHAPE >= 0.85**

310

**0.85 > SHAPE >= 0.4**

**0.4 > SHAPE**

No Data

**ENERGY = -289.0 Chr11:49251198-4925...**

# VAMP5 part B

Strands Chr11:49255043-49255164  
and Chr11:49256082-49256203

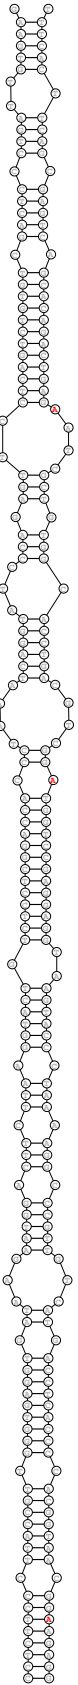

**SHAPE >= 0.85**

311

**0.85 > SHAPE >= 0.4**

**0.4 > SHAPE**

No Data

**ENERGY = -148.0 Chr11:49255043-4925...**

VPS11

Strands Chr15:30187172-30187250  
and Chr15:30187393-30187469

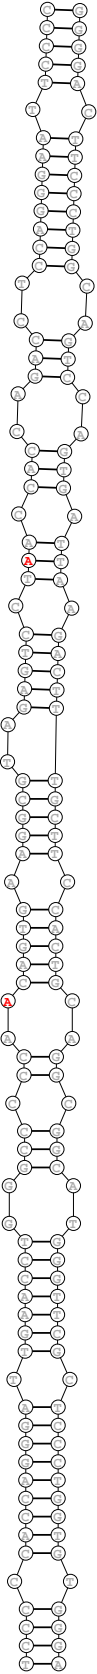

**SHAPE >= 0.85**

312

**0.85 > SHAPE >= 0.4**

**0.4 > SHAPE**

No Data

**ENERGY = -95.7 Chr15:30187172-30187...**



# VTI1B

Strands Chr10:80089649-80089815  
and Chr10:80090923-80091079

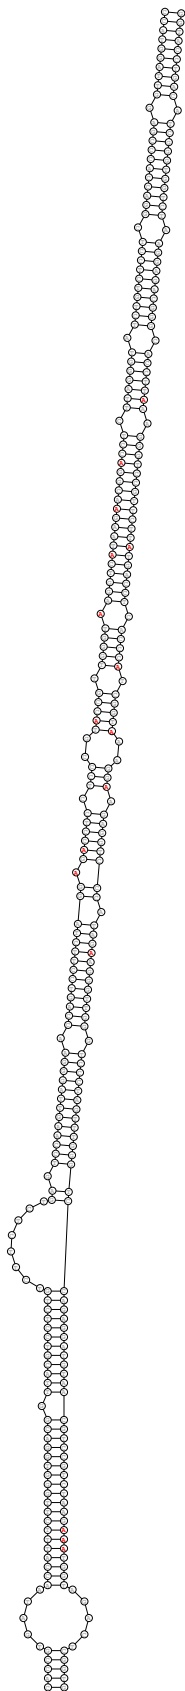

**SHAPE >= 0.85**

313

**0.85 > SHAPE >= 0.4**

**0.4 > SHAPE**

No Data

**ENERGY = -227.4 Chr10:80089649-8008...**

# XDH part A

Strands Chr11:14203681-14203832  
and Chr11:14205057-14205213

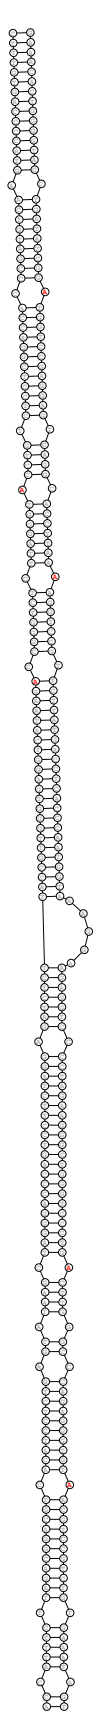

**SHAPE >= 0.85**

314

**0.85 > SHAPE >= 0.4**

**0.4 > SHAPE**

No Data

**ENERGY = -238.5 Chr11:14203681-1420...**

# XDH part B

Strands Chr11:14203932-14204116  
and Chr11:14205029-14205210

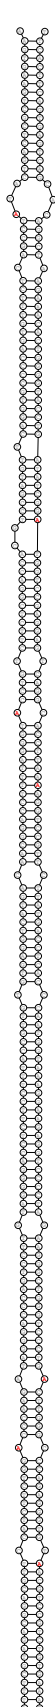

**SHAPE >= 0.85**

315

**0.85 > SHAPE >= 0.4**

**0.4 > SHAPE**

No Data

**ENERGY = -309.3 Chr11:14203932-1420...**

YY1

Strands Chr21:66824648-66824686  
and Chr21:66825302-66825340

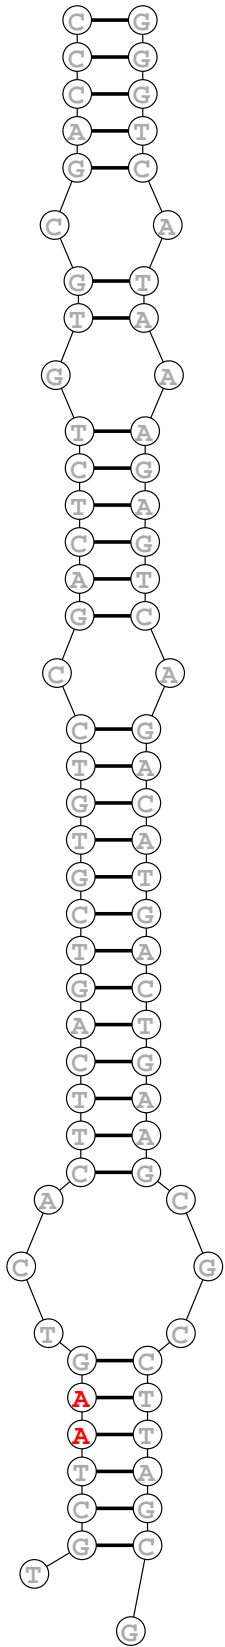

**SHAPE >= 0.85**

316

**0.85 > SHAPE >= 0.4**

**0.4 > SHAPE**

No Data

**ENERGY = -49.6 Chr21:66824648-66824...**

# ZMYM5

Strands Chr12:36511513-36511582  
and Chr12:36512952-36513031

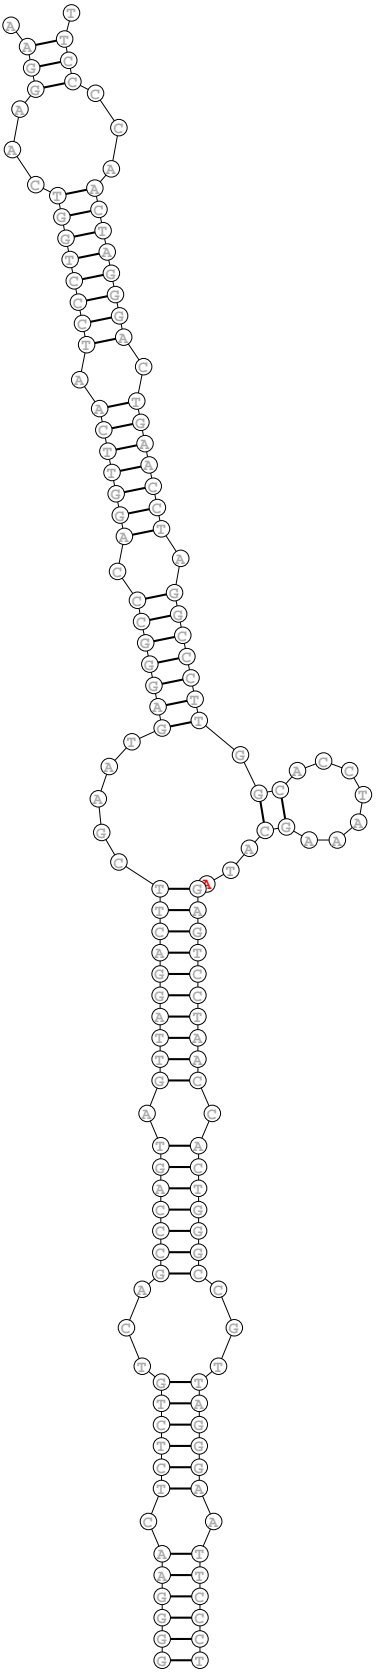

**SHAPE  $\geq$  0.85**

317

**0.85 > SHAPE  $\geq$  0.4**

**0.4 > SHAPE**

No Data

**ENERGY = -86.7 Chr12:36511513-36511...**



# ZNF394

Strands Chr25:37449224-37449429  
and Chr25:37450497-37450719

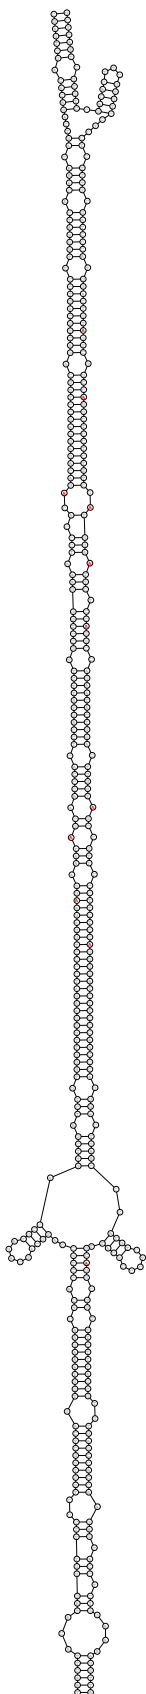

**SHAPE >= 0.85**

319

**0.85 > SHAPE >= 0.4**

**0.4 > SHAPE**

No Data

**ENERGY = -278.0 Chr25:37449224-3744...**

# ZNHIT3 part A

Strands Chr19:13151933-13152012  
and Chr19:13152352-13152431

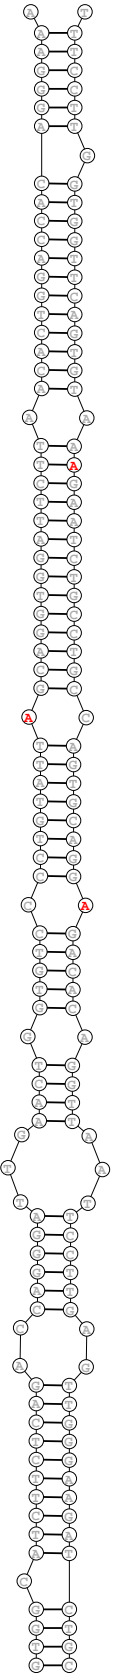

**SHAPE >= 0.85**

320

**0.85 > SHAPE >= 0.4**

**0.4 > SHAPE**

No Data

**ENERGY = -100.1 Chr19:13151933-1315...**



# ZNHIT3 part B

Strands Chr19:13151828-13151905  
and Chr19:13153321-13153397

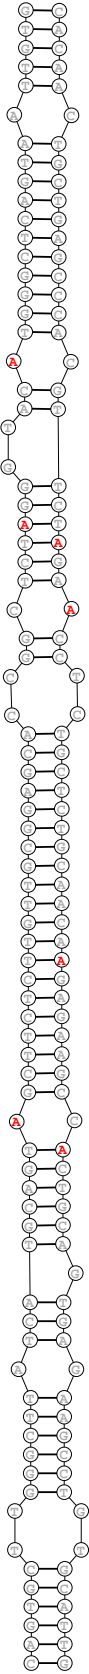

**SHAPE  $\geq 0.85$**

321

**0.85 > SHAPE  $\geq 0.4$**

**0.4 > SHAPE**

No Data

**ENERGY = -103.7 Chr19:13151828-1315...**

# ZNHIT3 part C

Strands Chr19:13151951-13152015  
and Chr19:13153233-13153298

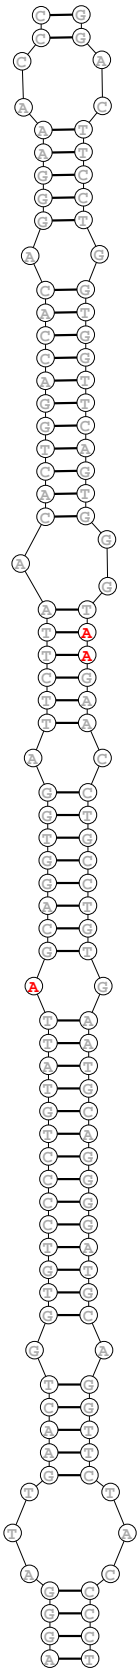

**SHAPE >= 0.85**

322

**0.85 > SHAPE >= 0.4**

**0.4 > SHAPE**

No Data

**ENERGY = -81.8 Chr19:13151951-13152...**
